# Supplementary material for: Differential accumulation of storage bodies with aging defines discrete subsets of microglia in the healthy brain
Source: eLife. 2020 Jun 24;9:e57495. doi: 10.7554/eLife.57495 (PMC7367682; doi:10.7554/eLife.57495)
Supplement: Figure 5—source data 1. — Sheet 1: Description of the column headers. Sheet 2: Proteins which were differentially regulated (adj. p value < 0.05) between subsets. [file elife-57495-fig5-data1.xlsx]

## Sheet: Description
Description of the column headers
Protein ID	Uniprot Accession Number
GeneID	Gene Symbol
Protein names	Primary protein name
-log p-val	-Log Student's T-test p-value
BH adj. p.value	Benjamini-Hochberg adjusted p-value
Log2FC	Log2 fold-change of AF+ versus AF- microglia
Intensity	Summed protein intensity across all samples

## Sheet: Significant Proteins
Figure 5 - Source Data 1
AF+ versus AF- Subset Associated Proteins
Protein ID	Gene ID	Protein names	-log p-val	BH adj. p.value	Log2FC	Intensity
Q9D2P8-4;Q9D2P8-5;Q9D2P8-3;Q9D2P8-2;Q9D2P8	Mobp	Myelin-associated oligodendrocyte basic protein	6.66837	7.21e-06	3.80006	449900000
Q6ZWQ0;Q6ZWQ0-3	Syne2	Nesprin-2	2.32114	0.0164655	3.55458	1001900000
P62806	Hist1h4a	Histone H4	0.659947	0.327151	-0.198812	849410000000
P60710	Actb	Actin, cytoplasmic 1;Actin, cytoplasmic 1, N-terminally processed	1.04686	0.161627	0.0800344	837510000000
Q99K70;Q99K70-2;Q7TT45	Rragc	Ras-related GTP-binding protein C	6.49481	1.01e-05	3.46572	317030000
P84244;P02301	H3f3a;H3f3c	Histone H3.3;Histone H3.3C	1.1149	0.14346	-0.227958	582490000000
P20065-2	Tmsb4x	Thymosin beta-4;Hematopoietic system regulatory peptide	0.0867617	0.87844	0.0159061	291160000000
Q9D7V9	Naaa	N-acylethanolamine-hydrolyzing acid amidase;N-acylethanolamine-hydrolyzing acid amidase subunit alpha;N-acylethanolamine-hydrolyzing acid amidase subunit beta	11.0005	1.6e-09	3.3637	485940000
O35114	Scarb2	Lysosome membrane protein 2	15.0762	5.92e-13	3.02926	2188900000
P16858;Q64467	Gapdh	Glyceraldehyde-3-phosphate dehydrogenase	0.184514	0.746093	-0.0296028	184070000000
Q9WV54	Asah1	Acid ceramidase;Acid ceramidase subunit alpha;Acid ceramidase subunit beta	18.2418	1.01e-15	2.99845	18687000000
P63158	Hmgb1	High mobility group protein B1	1.39884	0.0860562	-0.249818	147080000000
P23242	Gja1	Gap junction alpha-1 protein	9.66052	2.08e-08	2.92066	4950500000
P10922	H1f0	Histone H1.0;Histone H1.0, N-terminally processed	1.47912	0.0746814	-0.185739	130630000000
Q9R013	Ctsf	Cathepsin F	17.524	3.52e-15	2.77926	1965900000
P17742	Ppia	Peptidyl-prolyl cis-trans isomerase A;Peptidyl-prolyl cis-trans isomerase A, N-terminally processed	0.626737	0.348409	-0.0878421	100360000000
Q920A5	Scpep1	Retinoid-inducible serine carboxypeptidase	1.75882	0.0457282	2.71565	1812600000
P63017	Hspa8	Heat shock cognate 71 kDa protein	0.467527	0.460807	0.0436353	84383000000
Q5KU39	Vps41	Vacuolar protein sorting-associated protein 41 homolog	4.10864	0.000634269	2.62991	219040000
O35250-2;O35250	Exoc7	Exocyst complex component 7	2.70682	0.00817904	2.58466	547360000
P17182	Eno1	Alpha-enolase	0.206179	0.718854	0.0239571	67115000000
Q8BK30	Ndufv3	NADH dehydrogenase [ubiquinone] flavoprotein 3, mitochondrial	3.1249	0.00378464	2.57416	284690000
P01942	Hba	Hemoglobin subunit alpha	0.725629	0.291084	-0.408515	64358000000
O35604	Npc1	Niemann-Pick C1 protein	10.0581	9.95e-09	2.52409	455900000
O89023	Tpp1	Tripeptidyl-peptidase 1	11.6305	5.9e-10	2.50687	11711000000
Q99MB1	Tlr3	Toll-like receptor 3	7.63965	1.3e-06	2.47459	749850000
P68033;P68134;P63268;P62737	Actc1;Acta1;Actg2;Acta2	Actin, alpha cardiac muscle 1;Actin, alpha skeletal muscle;Actin, gamma-enteric smooth muscle;Actin, aortic smooth muscle	1.54474	0.0662955	0.420731	61137000000
O88531	Ppt1	Palmitoyl-protein thioesterase 1	18.8604	4.86e-16	2.47112	18625000000
Q3TCN2;Q3TCN2-2	Plbd2	Putative phospholipase B-like 2;Putative phospholipase B-like 2 28 kDa form;Putative phospholipase B-like 2 40 kDa form;Putative phospholipase B-like 2 15 kDa form	3.97546	0.000802593	2.36428	210580000
P84228	Hist1h3b	Histone H3.2	0.24088	0.680475	-0.168874	58858000000
O35639	Anxa3	Annexin A3	1.28216	0.106034	0.0715894	58708000000
P27773	Pdia3	Protein disulfide-isomerase A3	0.629067	0.347032	0.0615363	55540000000
P17439	Gba	Glucosylceramidase	10.5903	3.24e-09	2.35268	155830000
P24638	Acp2	Lysosomal acid phosphatase	11.4825	7.26e-10	2.32863	279710000
Q9CQ22	Lamtor1	Ragulator complex protein LAMTOR1	14.266	2.39e-12	2.2607	1653300000
Q04519	Smpd1	Sphingomyelin phosphodiesterase	6.06112	2.06e-05	2.25633	108610000
Q61207	Psap	Prosaposin	14.376	2.37e-12	2.23024	130970000000
Q07235	Serpine2	Glia-derived nexin	14.3277	2.37e-12	2.22929	625730000
Q9Z0M5	Lipa	Lysosomal acid lipase/cholesteryl ester hydrolase	2.46506	0.0126839	2.16832	114460000
O88273	Grem2	Gremlin-2	4.80887	0.000184408	2.09303	107350000
Q8BME9	Cbln4	Cerebellin-4	2.65373	0.0090189	1.99409	230600000
Q9CQE5	Rgs10	Regulator of G-protein signaling 10	0.115234	0.83721	0.024514	39463000000
Q9QWR8	Naga	Alpha-N-acetylgalactosaminidase	11.5739	6.27e-10	1.97619	1418800000
P11499	Hsp90ab1	Heat shock protein HSP 90-beta	0.243684	0.6777	0.0182109	38635000000
Q9D1L9	Lamtor5	Ragulator complex protein LAMTOR5	10.6446	2.96e-09	1.96894	1309200000
O88653	Lamtor3	Ragulator complex protein LAMTOR3	11.1587	1.29e-09	1.95133	982170000
P17751	Tpi1	Triosephosphate isomerase	0.361269	0.553189	-0.0422168	37624000000
P70699	Gaa	Lysosomal alpha-glucosidase	4.4869	0.000322891	1.95128	125370000
Q3THW5;P0C0S6	H2afv;H2afz	Histone H2A.V;Histone H2A.Z	0.464418	0.4624	-0.211223	37431000000
Q91W98	Slc15a4	Solute carrier family 15 member 4	7.06457	3.59e-06	1.93049	90026000
P43277	Hist1h1d	Histone H1.3	0.901872	0.212248	-0.383892	37072000000
P18242	Ctsd	Cathepsin D	16.2998	4.42e-14	1.92177	86075000000
O35381;Q64G17	Anp32a	Acidic leucine-rich nuclear phosphoprotein 32 family member A	0.323638	0.591118	-0.0529927	35231000000
Q80X95;Q6NTA4	Rraga;Rragb	Ras-related GTP-binding protein A;Ras-related GTP-binding protein B	5.8161	3.06e-05	1.89718	139440000
Q8BZL1;Q8BZL1-1	Neu4	Sialidase-4	3.76603	0.00116029	1.89564	188830000
Q9JLN9;Q9JLN9-2	Mtor	Serine/threonine-protein kinase mTOR	4.42104	0.00035864	1.86628	111190000
Q9QZ06	Tollip	Toll-interacting protein	12.0995	2.34e-10	1.82689	213410000
P23780;Q8VC60	Glb1	Beta-galactosidase	9.52317	2.71e-08	1.77032	139640000
P02088;P02089	Hbb-b1	Hemoglobin subunit beta-1	0.289596	0.627572	-0.178167	32166000000
Q9D0J8	Ptms	Parathymosin	1.45991	0.0773195	-0.394385	32077000000
P28798	Grn	Granulins;Acrogranin;Granulin-1;Granulin-2;Granulin-3;Granulin-4;Granulin-5;Granulin-6;Granulin-7	13.4633	1.35e-11	1.76751	55356000000
P14152	Mdh1	Malate dehydrogenase, cytoplasmic	0.250605	0.669807	0.0288358	30289000000
Q9ET22	Dpp7	Dipeptidyl peptidase 2	3.31802	0.002605	1.75575	58763000
C0HKG6;C0HKG5			13.3141	1.71e-11	1.73541	801020000
Q99P65	Slc29a3	Equilibrative nucleoside transporter 3	3.803	0.00109195	1.72021	165080000
Q9JHS3	Lamtor2	Ragulator complex protein LAMTOR2	7.30118	2.45e-06	1.68035	547100000
O70496	Clcn7	H(+)/Cl(-) exchange transporter 7	5.09392	0.000114559	1.64424	83566000
P0DP28;P0DP27;P0DP26;Q9D6P8;P20801			0.745377	0.281363	0.0991311	26408000000
O88668	Creg1	Protein CREG1	7.68085	1.21e-06	1.62683	193070000
P21956-2;P21956	Mfge8	Lactadherin	2.68825	0.00842695	1.61918	171060000
P29416	Hexa	Beta-hexosaminidase subunit alpha	10.9225	1.83e-09	1.60903	1435800000
Q9CQI6	Cotl1	Coactosin-like protein	0.866809	0.226344	0.0626411	24707000000
P17095	Hmga1	High mobility group protein HMG-I/HMG-Y	1.58474	0.0616677	-0.178799	24659000000
Q9R171;Q8BGU2	Cbln1	Cerebellin-1;Cerebellin;[des-Ser1]-cerebellin	2.73522	0.00776205	1.58566	166040000
Q571E4	Galns	N-acetylgalactosamine-6-sulfatase	4.78014	0.000193757	1.58212	44929000
P17047-3;P17047;P17047-2	Lamp2	Lysosome-associated membrane glycoprotein 2	6.88879	4.83e-06	1.57582	222510000
Q8R5F7-2;Q8R5F7	Ifih1	Interferon-induced helicase C domain-containing protein 1	1.7225	0.0488446	1.55748	149870000
Q01853	Vcp	Transitional endoplasmic reticulum ATPase	0.149903	0.7926	0.011608	23839000000
P51863	Atp6v0d1	V-type proton ATPase subunit d 1	10.5496	3.43e-09	1.538	948560000
P26041;P26040	Msn	Moesin	1.61023	0.0591875	0.139125	22937000000
P97821	Ctsc	Dipeptidyl peptidase 1;Dipeptidyl peptidase 1 exclusion domain chain;Dipeptidyl peptidase 1 heavy chain;Dipeptidyl peptidase 1 light chain	7.14186	3.22e-06	1.53776	456930000
Q99M71;Q99M71-2	Epdr1	Mammalian ependymin-related protein 1	7.44951	1.84e-06	1.52344	1116100000
Q8CF66	Lamtor4	Ragulator complex protein LAMTOR4;Ragulator complex protein LAMTOR4, N-terminally processed	1.81846	0.0410209	1.50898	107820000
Q60634-3;Q60634-2;Q60634	Flot2	Flotillin-2	6.21009	1.65e-05	1.48518	77017000
Q9CQW2	Arl8b	ADP-ribosylation factor-like protein 8B	11.0496	1.57e-09	1.48432	1097800000
Q9WUU7	Ctsz	Cathepsin Z	11.716	5.22e-10	1.46345	10913000000
P10605	Ctsb	Cathepsin B;Cathepsin B light chain;Cathepsin B heavy chain	12.2205	1.93e-10	1.45989	12327000000
O88746;O88746-2	Tom1	Target of Myb protein 1	11.0111	1.6e-09	1.41755	438840000
Q3TWL2;Q9CZX7	Tmem55b	Type 1 phosphatidylinositol 4,5-bisphosphate 4-phosphatase	9.73218	1.87e-08	1.41646	309960000
P06797;Q9JI81	Ctsl	Cathepsin L1;Cathepsin L1 heavy chain;Cathepsin L1 light chain	9.15425	5.94e-08	1.41231	2557700000
O89017	Lgmn	Legumain	8.78778	1.25e-07	1.40619	5329200000
O35405	Pld3	Phospholipase D3	6.71402	6.68e-06	1.39765	127520000
Q9D6W8		Uncharacterized protein C17orf59 homolog	2.50218	0.0118564	1.39517	62941000
P11438	Lamp1	Lysosome-associated membrane glycoprotein 1	9.84623	1.52e-08	1.37016	835140000
Q9CRC6		UPF0693 protein C10orf32 homolog	1.86819	0.0375603	1.35215	67299000
Q8VEB4	Pla2g15	Group XV phospholipase A2	2.6456	0.00914708	1.3247	214290000
P45376	Akr1b1	Aldose reductase	0.409859	0.507059	0.0505188	18983000000
Q8BFR4	Gns	N-acetylglucosamine-6-sulfatase	10.6857	2.91e-09	1.30309	962830000
P56542	Dnase2	Deoxyribonuclease-2-alpha	6.78854	5.87e-06	1.29169	71578000
P49935	Ctsh	Pro-cathepsin H;Cathepsin H mini chain;Cathepsin H;Cathepsin H heavy chain;Cathepsin H light chain	7.51769	1.6e-06	1.27312	796850000
Q8BG07-2;Q8BG07	Pld4	Phospholipase D4	9.71307	1.9e-08	1.27036	3164000000
P50429;P50429-2;Q32KI9	Arsb	Arylsulfatase B	11.3397	8.96e-10	1.26471	3788800000
Q8BP40	Acp6	Lysophosphatidic acid phosphatase type 6	2.3803	0.0147965	1.26143	139340000
P22437	Ptgs1	Prostaglandin G/H synthase 1	0.664225	0.324895	-0.0460479	18039000000
O88384	Vti1b	Vesicle transport through interaction with t-SNAREs homolog 1B	7.409	1.99e-06	1.25567	301270000
Q91ZF0	Dnajc24	DnaJ homolog subfamily C member 24	2.20699	0.0203141	1.24648	72463000
Q61599	Arhgdib	Rho GDP-dissociation inhibitor 2	0.446349	0.476403	0.0487809	17377000000
Q91VW3	Sh3bgrl3	SH3 domain-binding glutamic acid-rich-like protein 3	0.466865	0.46119	-0.105711	17328000000
Q91XV3	Basp1	Brain acid soluble protein 1	0.0406078	0.936764	-0.00630985	17152000000
Q64092-3;Q64092-2;Q64092-4;Q64092;Q08874-5;Q08874-9;Q08874-8;Q08874-7;Q08874-2;Q08874-4;Q08874;Q9WTW4;Q08874-6;Q08874-3	Tfe3;Mitf	Transcription factor E3;Microphthalmia-associated transcription factor	1.86752	0.0375888	1.23411	303920000
Q91X51	Gorasp1	Golgi reassembly-stacking protein 1	2.46753	0.0126252	1.22367	67251000
P60879;P60879-2	Snap25	Synaptosomal-associated protein 25	5.83283	3.01e-05	1.22358	739390000
Q9D1F4	Akt1s1	Proline-rich AKT1 substrate 1	3.06827	0.00421527	1.19585	47666000
Q99LR1	Abhd12	Monoacylglycerol lipase ABHD12	0.747171	0.280577	0.0808099	16555000000
O70362	Gpld1	Phosphatidylinositol-glycan-specific phospholipase D	8.88139	1.05e-07	1.19211	299420000
Q9Z2X1;Q9Z2X1-2	Hnrnpf	Heterogeneous nuclear ribonucleoprotein F;Heterogeneous nuclear ribonucleoprotein F, N-terminally processed	1.66496	0.0538916	-0.169096	16464000000
Q9D8Y0;Q9D4J1	Efhd2	EF-hand domain-containing protein D2	1.30237	0.102391	0.135099	16406000000
Q8R0H9;Q6P5E6	Gga1	ADP-ribosylation factor-binding protein GGA1	2.08646	0.0253885	1.19132	153910000
Q9JHJ3	Glmp	Glycosylated lysosomal membrane protein	3.30741	0.00266529	1.18167	45600000
Q02053	Uba1	Ubiquitin-like modifier-activating enzyme 1	0.201357	0.724508	0.0151069	16011000000
P23492	Pnp	Purine nucleoside phosphorylase	1.39542	0.0864723	0.145503	15993000000
Q60648	Gm2a	Ganglioside GM2 activator	7.53837	1.55e-06	1.16419	109100000
Q3V1L4	Nt5c2	Cytosolic purine 5-nucleotidase	2.43986	0.0132607	1.15529	73684000
P68433	Hist1h3a	Histone H3.1	0.555528	0.394323	-0.37098	15588000000
Q8K4M5	Commd1	COMM domain-containing protein 1	3.57183	0.00164118	1.14339	93350000
Q8K4Q0;Q8K4Q0-4;Q8K4Q0-5	Rptor	Regulatory-associated protein of mTOR	4.0378	0.000726509	1.1413	69156000
P99029-2;P99029	Prdx5	Peroxiredoxin-5, mitochondrial	0.911711	0.208294	0.0880664	14861000000
P12265	Gusb	Beta-glucuronidase	2.84877	0.00630384	1.12804	47345000
P02802	Mt1	Metallothionein-1	3.41698	0.00218845	1.12377	761150000
Q99KP3	Cryl1	Lambda-crystallin homolog	0.00199575	0.997444	-0.000310315	14279000000
Q9EQU5;Q9EQU5-3	Set	Protein SET	1.17743	0.129293	-0.164813	14244000000
P09411	Pgk1	Phosphoglycerate kinase 1	0.289241	0.627868	0.0504349	14114000000
Q9QYB5-2;Q9QYB5	Add3	Gamma-adducin	2.28371	0.0176805	1.11817	63888000
B9EKI3	Tmf1	TATA element modulatory factor	2.70334	0.00822539	1.11139	255540000
Q70FJ1-3;Q70FJ1-2;Q70FJ1	Akap9	A-kinase anchor protein 9	3.13984	0.00368833	1.09001	364470000
Q9DB43	Zfpl1	Zinc finger protein-like 1	3.84866	0.00101366	1.08298	228130000
Q9EQU3	Tlr9	Toll-like receptor 9	1.94522	0.0325295	1.07875	108830000
P97371	Psme1	Proteasome activator complex subunit 1	0.25254	0.667732	0.029133	13086000000
Q91VW5	Golga4	Golgin subfamily A member 4	6.15453	1.84e-05	1.07731	312630000
P63001	Rac1	Ras-related C3 botulinum toxin substrate 1	0.288679	0.628463	0.0782804	13038000000
P48725;P48725-3;P48725-2	Pcnt	Pericentrin	6.01899	2.18e-05	1.06486	599290000
Q3V4B5	Commd6	COMM domain-containing protein 6	10.0772	9.84e-09	1.05949	99362000
Q8CCH2	Nhlrc3	NHL repeat-containing protein 3	3.91379	0.00089614	1.04481	20520000
O09159	Man2b1	Lysosomal alpha-mannosidase	9.85373	1.52e-08	1.03787	1555300000
P08228	Sod1	Superoxide dismutase [Cu-Zn]	0.165021	0.772365	-0.0236544	12692000000
P70296;Q8VIN1-2;Q8VIN1	Pebp1	Phosphatidylethanolamine-binding protein 1;Hippocampal cholinergic neurostimulating peptide	1.19841	0.124085	0.149338	12684000000
Q91W86	Vps11	Vacuolar protein sorting-associated protein 11 homolog	5.99561	2.25e-05	1.022	236280000
Q3UMB9	Kiaa1033	WASH complex subunit 7	6.90706	4.75e-06	1.02195	127480000
O88983	Stx8	Syntaxin-8	2.86961	0.0060974	1.0187	107170000
Q9R0A0	Pex14	Peroxisomal membrane protein PEX14	3.35845	0.00240672	1.01405	164600000
P40336;P40336-2	Vps26a	Vacuolar protein sorting-associated protein 26A	4.2963	0.000449073	0.997312	409900000
Q60952	Cep250	Centrosome-associated protein CEP250	6.52849	9.67e-06	0.995103	374200000
O70318;P48193-2;P48193	Epb41l2	Band 4.1-like protein 2	1.05987	0.15823	0.0702297	12178000000
O08583;Q9JJW6-2	Alyref;Alyref2	THO complex subunit 4;Aly/REF export factor 2	1.51557	0.0701021	-0.263767	11757000000
Q8C0D9-2;Q8C0D9	Cep68	Centrosomal protein of 68 kDa	4.85879	0.000169697	0.994531	63482000
Q99LX0	Park7	Protein deglycase DJ-1	0.354417	0.559767	0.0602011	11683000000
A2AL36	Cntrl	Centriolin	2.0955	0.024985	0.990039	57868000
P35564	Canx	Calnexin	1.13055	0.139717	0.128603	11358000000
P63044	Vamp2	Vesicle-associated membrane protein 2	4.47604	0.000329217	0.989964	112180000
Q920Q4;Q920Q4-2	Vps16	Vacuolar protein sorting-associated protein 16 homolog	6.31636	1.4e-05	0.986388	278910000
Q9CRA5	Golph3	Golgi phosphoprotein 3	5.16127	0.000101373	0.979157	98262000
P20060	Hexb	Beta-hexosaminidase subunit beta	8.79317	1.25e-07	0.97875	20215000000
Q61792	Lasp1	LIM and SH3 domain protein 1	1.35644	0.0929128	0.221887	10946000000
Q5SVR0-2;Q5SVR0	Tbc1d9b	TBC1 domain family member 9B	6.26264	1.53e-05	0.975434	184690000
P70168	Kpnb1	Importin subunit beta-1	0.147817	0.795911	0.0216104	10899000000
Q60972	Rbbp4	Histone-binding protein RBBP4	1.44189	0.0794905	-0.113952	10777000000
Q3UQN2;Q3UQN2-2;Q3UQN2-3	Fcho2	F-BAR domain only protein 2	2.95992	0.00515728	0.962512	90158000
Q9EPJ9;Q9EPJ9-2	Arfgap1	ADP-ribosylation factor GTPase-activating protein 1	4.72854	0.000211885	0.943646	242980000
Q9CZG3	Commd8	COMM domain-containing protein 8	4.91646	0.00015323	0.939812	231290000
Q8CJ40;Q8CJ40-3	Crocc	Rootletin	7.03142	3.77e-06	0.931918	968970000
Q3UJU9	Rmdn3	Regulator of microtubule dynamics protein 3	2.04462	0.027288	0.929231	36337000
P62983;P0CG49;P0CG50	Rps27a;Ubb;Ubc	Ubiquitin-40S ribosomal protein S27a;Ubiquitin;40S ribosomal protein S27a;Polyubiquitin-B;Ubiquitin;Polyubiquitin-C;Ubiquitin;Ubiquitin-related 1;Ubiquitin-related 2	1.00922	0.17308	-0.235882	10134000000
Q8C2E7	Kiaa0196	WASH complex subunit strumpellin	2.51769	0.0114969	0.929035	51772000
P97351	Rps3a	40S ribosomal protein S3a	1.19761	0.124245	0.146618	10041000000
P07901	Hsp90aa1	Heat shock protein HSP 90-alpha	0.12119	0.829068	-0.00744544	9997200000
Q9Z1Q5	Clic1	Chloride intracellular channel protein 1	0.141804	0.802378	0.0138129	9850600000
P16675	Ctsa	Lysosomal protective protein;Lysosomal protective protein 32 kDa chain;Lysosomal protective protein 20 kDa chain	11.3582	8.96e-10	0.92753	1139600000
P40338	Vhl	Von Hippel-Lindau disease tumor suppressor	2.0739	0.025912	0.927396	52889000
O88630	Gosr1	Golgi SNAP receptor complex member 1	2.39208	0.0144879	0.926382	218000000
Q9R0Q3	Tmed2	Transmembrane emp24 domain-containing protein 2	1.74283	0.0469889	0.921805	73907000
Q9D7B6	Acad8	Isobutyryl-CoA dehydrogenase, mitochondrial	1.88024	0.0367054	0.91062	98727000
Q8VEJ9	Vps4a	Vacuolar protein sorting-associated protein 4A	0.82151	0.245605	1.74471	9627400000
P39098-2;P39098	Man1a2	Mannosyl-oligosaccharide 1,2-alpha-mannosidase IB	3.13353	0.00372448	0.906781	66470000
O70439	Stx7	Syntaxin-7	10.8236	2.21e-09	0.903438	2267000000
Q8K1X1	Wdr11	WD repeat-containing protein 11	1.89205	0.0360915	0.882537	50634000
A3KGF7;A3KGF7-2;A3KGF7-3;A3KGF7-4	Plcb2	1-phosphatidylinositol 4,5-bisphosphate phosphodiesterase beta-2	1.75361	0.0461775	0.878145	119400000
Q9D920	Loh12cr1	Loss of heterozygosity 12 chromosomal region 1 protein homolog	3.78641	0.0011221	0.87624	26710000
Q9JKC8	Ap3m1	AP-3 complex subunit mu-1	2.00006	0.0295705	0.868276	203420000
Q99KG7	Hps4	Hermansky-Pudlak syndrome 4 protein homolog	2.63486	0.00925934	0.855912	34401000
Q6P5D4	Cep135	Centrosomal protein of 135 kDa	4.78478	0.000192336	0.850649	231480000
P58681	Tlr7	Toll-like receptor 7	1.8299	0.0401692	0.842869	126600000
Q9Z1T1	Ap3b1	AP-3 complex subunit beta-1	5.3394	7.14e-05	0.831504	324220000
E9QAT4-2;E9QAT4	Sec16a		5.29236	7.79e-05	0.831426	165450000
Q7TMK9	Syncrip	Heterogeneous nuclear ribonucleoprotein Q	0.0878974	0.876412	-0.0104481	8468100000
Q5FWK3	Arhgap1	Rho GTPase-activating protein 1	2.00801	0.0291463	0.830559	197660000
Q8BWQ6;Q8BWQ6-2;Q8BWQ6-3		UPF0505 protein C16orf62 homolog	6.24855	1.53e-05	0.829263	241790000
Q99JX3;Q99JX3-2	Gorasp2	Golgi reassembly-stacking protein 2	2.73916	0.00773835	0.828615	34713000
Q9R0Q6	Arpc1a	Actin-related protein 2/3 complex subunit 1A	1.91457	0.0345434	0.828313	83593000
O35075	Dscr3	Down syndrome critical region protein 3 homolog	4.00118	0.000774761	0.826747	145200000
Q8BL48-2;Q8BL48	Unk	RING finger protein unkempt homolog	1.88858	0.0362945	0.824714	138000000
Q9JII6	Akr1a1	Alcohol dehydrogenase [NADP(+)]	1.24732	0.113262	0.0569648	8234300000
Q3TYD4;Q3TYD4-2	Arsg	Arylsulfatase G	1.82496	0.0405979	0.810533	67914000
P06745	Gpi	Glucose-6-phosphate isomerase	1.68576	0.0521892	0.1382	8123000000
Q9Z0J0	Npc2	Epididymal secretory protein E1	5.03267	0.000126799	0.7935	855640000
Q91YQ5	Rpn1	Dolichyl-diphosphooligosaccharide--protein glycosyltransferase subunit 1	1.39594	0.0864224	0.0888501	8063500000
O55100-2;O55100	Syngr1	Synaptogyrin-1	2.08624	0.0253885	0.790768	69430000
P62242	Rps8	40S ribosomal protein S8	0.293991	0.622744	0.0539443	8046400000
Q8R5L3-2;Q8R5L3	Vps39	Vam6/Vps39-like protein	4.04412	0.000719249	0.7758	45024000
Q99KC8	Vwa5a	von Willebrand factor A domain-containing protein 5A	0.720851	0.293669	-0.0384522	7931000000
Q9JHF7	Hpgds	Hematopoietic prostaglandin D synthase	3.77689	0.00114475	0.775638	393390000
Q62192	Cd180	CD180 antigen	7.59945	1.41e-06	0.772851	1646800000
P63242	Eif5a	Eukaryotic translation initiation factor 5A-1	0.438321	0.482378	0.100448	7733100000
P09602	Hmgn2	Non-histone chromosomal protein HMG-17	1.45238	0.0780627	-0.252643	7711400000
Q9EQN3	Tsc22d4	TSC22 domain family protein 4	2.14691	0.0226147	0.762552	52158000
Q9Z0Y1	Dctn3	Dynactin subunit 3	4.09969	0.0006445	0.759824	263950000
Q63829	Commd3	COMM domain-containing protein 3	5.36605	6.84e-05	0.751833	411580000
Q922S4-2;Q922S4-3;Q922S4	Pde2a	cGMP-dependent 3,5-cyclic phosphodiesterase	4.21924	0.000516737	0.744695	326000000
P16332	Mut	Methylmalonyl-CoA mutase, mitochondrial	1.89252	0.0360915	0.737988	141440000
Q9JIG7	Ccdc22	Coiled-coil domain-containing protein 22	10.6542	2.96e-09	0.737563	1020800000
Q8BG51;Q8BG51-2;Q8BG51-3;Q8BG51-4;Q8JZN7	Rhot1	Mitochondrial Rho GTPase 1	2.1203	0.0238472	0.736943	36804000
Q61112;Q61112-2	Sdf4	45 kDa calcium-binding protein	6.41765	1.17e-05	0.733899	1648700000
P70335;P70335-2	Rock1	Rho-associated protein kinase 1	2.18477	0.0211449	0.733329	237580000
Q8C0L6;Q8C0L6-2	Paox	Peroxisomal N(1)-acetyl-spermine/spermidine oxidase	2.36552	0.0152015	0.720775	77633000
P11031	Sub1	Activated RNA polymerase II transcriptional coactivator p15	0.790366	0.258728	-0.181911	7366000000
O70200	Aif1	Allograft inflammatory factor 1	0.720478	0.293793	-0.131932	7312200000
P62774	Mtpn	Myotrophin	1.09219	0.149734	0.166783	7297700000
P47911	Rpl6	60S ribosomal protein L6	0.00906872	0.985482	-0.00256552	7255000000
Q61239	Fnta	Protein farnesyltransferase/geranylgeranyltransferase type-1 subunit alpha	4.37116	0.000396968	0.716588	184600000
Q62093	Srsf2	Serine/arginine-rich splicing factor 2	1.62328	0.0581105	-0.275919	7219800000
Q60766-2;Q60766	Irgm1	Immunity-related GTPase family M protein 1	2.4785	0.0123491	0.702521	91938000
P08752;B2RSH2	Gnai2	Guanine nucleotide-binding protein G(i) subunit alpha-2	0.43659	0.483759	0.0332501	7158800000
P35279-2	Rab6a	Ras-related protein Rab-6A	2.64428	0.00914708	0.700775	158330000
Q8VIB3	St3gal6	Type 2 lactosamine alpha-2,3-sialyltransferase	5.73856	3.43e-05	0.696242	233510000
P29351;P29351-2;P29351-3	Ptpn6	Tyrosine-protein phosphatase non-receptor type 6	0.391973	0.523543	0.0383094	7061100000
O54774	Ap3d1	AP-3 complex subunit delta-1	3.9166	0.000892208	0.686337	307640000
P06151;P00342	Ldha	L-lactate dehydrogenase A chain	0.273319	0.646609	0.0278326	7012500000
O89086	Rbm3	RNA-binding protein 3	0.996863	0.177362	-0.157102	6979300000
Q9JHK5	Plek	Pleckstrin	0.157704	0.783469	-0.0409319	6942900000
Q8K370	Acad10	Acyl-CoA dehydrogenase family member 10	2.16269	0.021946	0.683856	42806000
Q9EPL9	Acox3	Peroxisomal acyl-coenzyme A oxidase 3	6.94685	4.38e-06	0.683775	729250000
Q9QYE6	Golga5	Golgin subfamily A member 5	3.79652	0.00110273	0.672933	470090000
Q61171	Prdx2	Peroxiredoxin-2	1.10103	0.147258	0.117775	6881600000
Q9QUI0	Rhoa	Transforming protein RhoA	1.5018	0.0718912	0.106442	6878500000
P51859	Hdgf	Hepatoma-derived growth factor	1.49071	0.0732287	-0.18881	6867500000
P47962	Rpl5	60S ribosomal protein L5	1.26254	0.110173	0.129308	6848500000
Q8C754-2;Q8C754	Vps52	Vacuolar protein sorting-associated protein 52 homolog	2.10337	0.0246012	0.663891	34473000
P12970	Rpl7a	60S ribosomal protein L7a	0.557018	0.393289	0.0997577	6755100000
Q6PGL7;Q6PGL7-2	Fam21	WASH complex subunit FAM21	4.33883	0.000417701	0.66346	525720000
Q8BMP6	Acbd3	Golgi resident protein GCP60	5.87799	2.83e-05	0.653208	716830000
Q99MR3	Slc12a9	Solute carrier family 12 member 9	4.68915	0.000226186	0.651903	393380000
P38060;Q8JZS7	Hmgcl	Hydroxymethylglutaryl-CoA lyase, mitochondrial	5.11511	0.000112275	0.646368	678840000
P55096	Abcd3	ATP-binding cassette sub-family D member 3	2.97913	0.00497398	0.645458	119740000
Q91VU0	Fam3c	Protein FAM3C	5.52058	5.19e-05	0.644434	259920000
P26645	Marcks	Myristoylated alanine-rich C-kinase substrate	0.268022	0.650515	-0.0392954	6684400000
Q9CR51	Atp6v1g1	V-type proton ATPase subunit G 1	5.76754	3.31e-05	0.628607	747470000
Q9ET30	Tm9sf3	Transmembrane 9 superfamily member 3	6.35724	1.31e-05	0.627459	555890000
Q921M4-2;Q921M4	Golga2	Golgin subfamily A member 2	6.9531	4.37e-06	0.624664	1240500000
P84096	Rhog	Rho-related GTP-binding protein RhoG	1.4763	0.0750734	0.100262	6631400000
Q9DC70	Ndufs7	NADH dehydrogenase [ubiquinone] iron-sulfur protein 7, mitochondrial	2.0747	0.025912	0.623952	222600000
Q9QZ88;Q9QZ88-2	Vps29	Vacuolar protein sorting-associated protein 29	4.14777	0.000589154	0.623478	1077700000
Q99MN1	Kars	Lysine--tRNA ligase	2.92609	0.00545762	0.621741	562790000
P27659	Rpl3	60S ribosomal protein L3	0.365539	0.548568	0.0980043	6533700000
Q8VBT6	Apobr	Apolipoprotein B receptor	2.97006	0.00505859	0.620649	164960000
Q9D8N2	Fam45a	Protein FAM45A	3.8132	0.0010759	0.61801	218010000
O08912	Galnt1	Polypeptide N-acetylgalactosaminyltransferase 1;Polypeptide N-acetylgalactosaminyltransferase 1 soluble form	3.76024	0.00117353	0.614437	139900000
Q8BIG7	Comtd1	Catechol O-methyltransferase domain-containing protein 1	6.78755	5.87e-06	0.609716	257550000
Q921W4;Q921W4-2	Cryzl1	Quinone oxidoreductase-like protein 1	3.39118	0.00228175	0.602388	206090000
Q9EQH3	Vps35	Vacuolar protein sorting-associated protein 35	7.08815	3.55e-06	0.601718	1238000000
Q3UPH1	Prrc1	Protein PRRC1	5.74255	3.41e-05	0.598961	296390000
Q9D7G0	Prps1	Ribose-phosphate pyrophosphokinase 1	6.04505	2.11e-05	0.587459	1476300000
Q9Z1Z0;Q9Z1Z0-2;Q9Z1Z0-4;Q9Z1Z0-3	Uso1	General vesicular transport factor p115	6.50389	1e-05	0.586031	2266200000
O08997	Atox1	Copper transport protein ATOX1	0.594481	0.368641	0.0754254	6244700000
Q9ERI6	Rdh14	Retinol dehydrogenase 14	3.82324	0.00106395	0.585157	83955000
P47963	Rpl13	60S ribosomal protein L13	0.669158	0.322047	0.139372	6234000000
P83887	Tubg1	Tubulin gamma-1 chain	4.28271	0.000458725	0.580841	234170000
Q8JZY2	Commd10	COMM domain-containing protein 10	5.9937	2.25e-05	0.577435	234550000
Q80XQ2	Tbc1d5	TBC1 domain family member 5	4.18122	0.000555921	0.576709	128300000
Q8K1R7	Nek9	Serine/threonine-protein kinase Nek9	4.11042	0.000633139	0.573296	218570000
P12367;P31324	Prkar2a	cAMP-dependent protein kinase type II-alpha regulatory subunit	5.62085	4.31e-05	0.566325	410670000
O08756	Hsd17b10	3-hydroxyacyl-CoA dehydrogenase type-2	3.23117	0.00309143	0.563062	574780000
Q5XG73-2;Q5XG73-3;Q5XG73	Acbd5	Acyl-CoA-binding domain-containing protein 5	2.84588	0.00631049	0.556689	146700000
Q63844	Mapk3	Mitogen-activated protein kinase 3	1.48566	0.0738487	0.112971	6120200000
Q9DCD0	Pgd	6-phosphogluconate dehydrogenase, decarboxylating	1.34408	0.094895	0.102589	6096800000
Q8VI36-2;Q8VI36	Pxn	Paxillin	3.50024	0.00187348	0.552233	782920000
P22315	Fech	Ferrochelatase, mitochondrial	3.86542	0.000979265	0.54934	459360000
Q8BH24	Tm9sf4	Transmembrane 9 superfamily member 4	3.81438	0.00107512	0.543692	188730000
Q91ZU6-2;Q91ZU6;Q91ZU6-4;Q91ZU6-3;Q91ZU6-5	Dst	Dystonin	2.5361	0.011132	0.543567	1290100000
Q91XA2	Golm1	Golgi membrane protein 1	5.32283	7.36e-05	0.542103	1796300000
O35684	Serpini1	Neuroserpin	2.04851	0.0271216	0.539419	37350000
P61957	Sumo2	Small ubiquitin-related modifier 2	1.70543	0.0504709	-0.272788	5977400000
Q7TQK5	Ccdc93	Coiled-coil domain-containing protein 93	5.41939	6.18e-05	0.536861	872100000
P62082	Rps7	40S ribosomal protein S7	0.542447	0.403142	0.0781651	5872100000
Q8BFP9	Pdk1	[Pyruvate dehydrogenase (acetyl-transferring)] kinase isozyme 1, mitochondrial	5.51798	5.19e-05	0.53677	285040000
Q9D8C4	Ifi35	Interferon-induced 35 kDa protein homolog	4.74908	0.0002054	0.535823	784080000
P62754	Rps6	40S ribosomal protein S6	0.125062	0.823832	0.0232864	5836600000
P62918	Rpl8	60S ribosomal protein L8	0.0215069	0.967811	0.00640257	5835100000
P18653	Rps6ka1	Ribosomal protein S6 kinase alpha-1	1.44937	0.0784255	0.125158	5776800000
A2AIV8	Card9	Caspase recruitment domain-containing protein 9	6.50014	1e-05	0.530611	416560000
O35459	Ech1	Delta(3,5)-Delta(2,4)-dienoyl-CoA isomerase, mitochondrial	3.01242	0.00466971	0.528494	148300000
Q8BTX9	Hsdl1	Inactive hydroxysteroid dehydrogenase-like protein 1	2.53924	0.0110693	0.5283	62242000
Q9QZB7	Actr10	Actin-related protein 10	2.45155	0.0130027	0.528029	64453000
Q9CS42	Prps2	Ribose-phosphate pyrophosphokinase 2	3.3867	0.00229784	0.527519	725870000
P50516;P50516-2	Atp6v1a	V-type proton ATPase catalytic subunit A	5.70125	3.67e-05	0.527403	2409700000
P21126	Ubl4a	Ubiquitin-like protein 4A	2.52696	0.0112954	0.526389	124670000
B1AY13;B1AY13-2	Usp24	Ubiquitin carboxyl-terminal hydrolase 24	2.34705	0.015674	0.524717	233850000
Q62048;Q62048-2	Pea15	Astrocytic phosphoprotein PEA-15	1.02762	0.167646	0.168967	5506200000
O08585	Clta	Clathrin light chain A	4.15932	0.000577759	0.524564	1312700000
Q6PB93-2;Q6PB93	Galnt2	Polypeptide N-acetylgalactosaminyltransferase 2;Polypeptide N-acetylgalactosaminyltransferase 2 soluble form	3.22022	0.00315156	0.523896	139330000
P49722	Psma2	Proteasome subunit alpha type-2	1.47828	0.0747795	-0.120623	5348900000
B2RQC6-2;B2RQC6	Cad	CAD protein;Glutamine-dependent carbamoyl-phosphate synthase;Aspartate carbamoyltransferase;Dihydroorotase	4.33206	0.000419921	0.523349	275880000
P24527	Lta4h	Leukotriene A-4 hydrolase	0.00960265	0.984552	0.00151878	5328900000
Q8JZN5	Acad9	Acyl-CoA dehydrogenase family member 9, mitochondrial	2.6696	0.00874565	0.519509	165500000
P48036	Anxa5	Annexin A5	1.24132	0.114706	-0.328015	5257600000
P62137	Ppp1ca	Serine/threonine-protein phosphatase PP1-alpha catalytic subunit	1.63602	0.0566667	0.145902	5244700000
P57746	Atp6v1d	V-type proton ATPase subunit D	1.83354	0.0398961	0.516403	109960000
Q8K2Q0	Commd9	COMM domain-containing protein 9	3.13818	0.00369713	0.508635	290910000
P19973;P19973-2	Lsp1	Lymphocyte-specific protein 1	0.455399	0.46977	-0.0705072	5166800000
Q9CZX8	Rps19	40S ribosomal protein S19	0.783998	0.261839	0.129727	5132900000
Q9QYS9;Q9QYS9-8;Q9QYS9-4;Q9QYS9-3;Q9QYS9-2;Q9QYS9-7;Q9QYS9-6;Q9QYS9-5	Qki	Protein quaking	1.19557	0.124761	-0.104638	5095900000
Q9DCM0	Ethe1	Persulfide dioxygenase ETHE1, mitochondrial	3.09893	0.00399507	0.50719	341970000
O35344	Kpna3	Importin subunit alpha-4	0.0965536	0.863055	-0.029472	5017400000
P08003	Pdia4	Protein disulfide-isomerase A4	1.27961	0.106474	0.0755099	5009800000
P62814	Atp6v1b2	V-type proton ATPase subunit B, brain isoform	5.80418	3.13e-05	0.505172	2893400000
Q810B6;Q810B6-2	Ankfy1	Rabankyrin-5	4.85976	0.000169697	0.504792	533940000
Q9QZ23	Nfu1	NFU1 iron-sulfur cluster scaffold homolog, mitochondrial	2.17048	0.0216744	0.503235	75381000
Q9WTP7	Ak3	GTP:AMP phosphotransferase AK3, mitochondrial	2.41977	0.0137886	0.501624	73963000
P14148	Rpl7	60S ribosomal protein L7	0.892602	0.215277	0.134326	4952000000
Q6TYB5	Fez2	Fasciculation and elongation protein zeta-2	1.92409	0.0339037	0.500727	51864000
P11352	Gpx1	Glutathione peroxidase 1	0.459659	0.466249	-0.077971	4926200000
P62751	Rpl23a	60S ribosomal protein L23a	0.277309	0.642242	0.0913631	4887100000
Q9CWE0;Q9CWE0-2	Mtfr1l	Mitochondrial fission regulator 1-like	2.04037	0.0274692	0.499885	79100000
P43024	Cox6a1	Cytochrome c oxidase subunit 6A1, mitochondrial	2.40485	0.0141397	0.499605	2196600000
Q9DCJ9	Npl	N-acetylneuraminate lyase	5.65786	4.02e-05	0.492501	2862800000
Q9CQ60	Pgls	6-phosphogluconolactonase	1.37266	0.0901368	0.112959	4837700000
Q9R0Y5;Q9R0Y5-2	Ak1	Adenylate kinase isoenzyme 1	0.165011	0.772365	0.0197826	4804100000
P50171;P50171-2	Hsd17b8	Estradiol 17-beta-dehydrogenase 8	3.08371	0.0040984	0.489635	151070000
P61294	Rab6b	Ras-related protein Rab-6B	4.57342	0.000279486	0.488977	1382900000
Q8BFQ8	Pddc1	Parkinson disease 7 domain-containing protein 1	4.69621	0.00022324	0.487884	322360000
Q3UJB9;Q3UJB9-2	Edc4	Enhancer of mRNA-decapping protein 4	3.26578	0.00289792	0.48619	96385000
A6H5Y3	Mtr	Methionine synthase	2.32632	0.0163273	0.486006	384080000
Q8R1M2	H2afj	Histone H2A.J	1.32125	0.0993669	-0.589876	4703800000
P32020-2;P32020	Scp2	Non-specific lipid-transfer protein	4.56357	0.000283621	0.485568	1563700000
P97372	Psme2	Proteasome activator complex subunit 2	0.540113	0.404992	0.166691	4629500000
Q9CPR4	Rpl17	60S ribosomal protein L17	1.29424	0.103904	0.13918	4615100000
P85094	Isoc2a	Isochorismatase domain-containing protein 2A, mitochondrial	1.90246	0.035406	0.485211	393950000
O35855	Bcat2	Branched-chain-amino-acid aminotransferase, mitochondrial	2.96736	0.0050765	0.483254	221250000
P35980	Rpl18	60S ribosomal protein L18	0.458105	0.467385	0.0833525	4567100000
Q99KJ8	Dctn2	Dynactin subunit 2	7.19611	2.95e-06	0.483174	1859400000
Q8VD04	Gripap1	GRIP1-associated protein 1	2.71164	0.00810799	0.482973	153730000
P68037	Ube2l3	Ubiquitin-conjugating enzyme E2 L3	0.570971	0.384009	0.0871379	4483600000
P80314	Cct2	T-complex protein 1 subunit beta	1.31954	0.0996651	0.101266	4461000000
O88447	Klc1	Kinesin light chain 1	3.9873	0.000788725	0.474053	385110000
Q8VCW8	Acsf2	Acyl-CoA synthetase family member 2, mitochondrial	7.55167	1.53e-06	0.473455	1019200000
Q60864	Stip1	Stress-induced-phosphoprotein 1	1.62131	0.0583354	0.0942278	4394100000
P15532	Nme1	Nucleoside diphosphate kinase A	1.39313	0.0867711	0.190986	4384300000
Q9Z2U1	Psma5	Proteasome subunit alpha type-5	0.159667	0.780428	0.0227233	4380100000
O08663	Metap2	Methionine aminopeptidase 2	4.58338	0.00027478	0.472054	455380000
Q9D0M3-2;Q9D0M3	Cyc1	Cytochrome c1, heme protein, mitochondrial	4.92769	0.000149853	0.470984	997020000
P47955	Rplp1	60S acidic ribosomal protein P1	2.65192	0.00904628	0.46685	6702000000
Q9CXF4	Tbc1d15	TBC1 domain family member 15	2.1729	0.0216122	0.465305	102420000
P55937-1;P55937	Golga3	Golgin subfamily A member 3	3.42187	0.00217453	0.463998	539860000
Q9Z1G3	Atp6v1c1	V-type proton ATPase subunit C 1	4.27125	0.000469818	0.462616	532580000
Q8BHN3-2	Ganab	Neutral alpha-glucosidase AB	0.79701	0.255959	0.0641807	4342700000
Q6PCP5-3;Q6PCP5;Q6PCP5-4	Mff	Mitochondrial fission factor	3.13224	0.0037266	0.461807	212670000
P62880	Gnb2	Guanine nucleotide-binding protein G(I)/G(S)/G(T) subunit beta-2	0.00197437	0.997444	-0.000277413	4333700000
Q91VR8	Brk1	Protein BRICK1	3.59011	0.00158764	0.459113	1023600000
Q922R8	Pdia6	Protein disulfide-isomerase A6	1.02179	0.169499	0.111353	4324000000
Q921H8;Q8VCH0	Acaa1a;Acaa1b	3-ketoacyl-CoA thiolase A, peroxisomal;3-ketoacyl-CoA thiolase B, peroxisomal	5.10753	0.000112845	0.453495	2310400000
P97461	Rps5	40S ribosomal protein S5;40S ribosomal protein S5, N-terminally processed	5.82097	3.06e-05	0.452167	2366400000
Q3TBT3-3;Q3TBT3;Q3TBT3-2	Tmem173	Stimulator of interferon genes protein	0.269562	0.649126	0.0479306	4288700000
O35643	Ap1b1	AP-1 complex subunit beta-1	3.26317	0.00289843	0.45211	610540000
Q9EQ20	Aldh6a1	Methylmalonate-semialdehyde dehydrogenase [acylating], mitochondrial	5.50647	5.28e-05	0.451682	1375000000
Q61543	Glg1	Golgi apparatus protein 1	6.72584	6.57e-06	0.451172	1441100000
Q9DBL1	Acadsb	Short/branched chain specific acyl-CoA dehydrogenase, mitochondrial	4.05582	0.000701724	0.450158	158280000
P40630-2;P40630	Tfam	Transcription factor A, mitochondrial	1.76969	0.0447786	0.448978	124580000
P82343;P82343-2	Renbp	N-acylglucosamine 2-epimerase	3.82151	0.00106395	0.446894	1414600000
Q8BYZ1;Q8BYZ1-2	Abi3	ABI gene family member 3	5.76419	3.32e-05	0.445541	3609700000
Q01405	Sec23a	Protein transport protein Sec23A	4.54702	0.000291804	0.444372	522040000
Q09014	Ncf1	Neutrophil cytosol factor 1	0.27009	0.649126	-0.0228216	4199200000
Q9WUK2-2;Q9WUK2	Eif4h	Eukaryotic translation initiation factor 4H	0.0683897	0.902156	-0.0156995	4195000000
Q8K1I7	Wipf1	WAS/WASL-interacting protein family member 1	2.84602	0.00631049	0.443632	347490000
O70172	Pip4k2a	Phosphatidylinositol 5-phosphate 4-kinase type-2 alpha	1.59624	0.0605045	0.141315	4172200000
Q9D662	Sec23b	Protein transport protein Sec23B	4.48861	0.000322525	0.442626	471520000
P57759	Erp29	Endoplasmic reticulum resident protein 29	0.178519	0.754258	-0.0228736	4151000000
P70333	Hnrnph2	Heterogeneous nuclear ribonucleoprotein H2	0.710071	0.299215	-0.134216	4129000000
Q3TC93	Hs1bp3	HCLS1-binding protein 3	1.99991	0.0295705	0.441119	310330000
Q9JKP5;Q8R003	Mbnl1	Muscleblind-like protein 1	0.546187	0.400643	-0.12265	4099800000
P10639	Txn	Thioredoxin	0.531412	0.410246	0.0472532	4077200000
Q8BJ48	Nagpa	N-acetylglucosamine-1-phosphodiester alpha-N-acetylglucosaminidase	4.22222	0.000514451	0.440953	388000000
P70261	Pald1	Paladin	3.99492	0.000781219	0.440648	888560000
Q9R1P0	Psma4	Proteasome subunit alpha type-4	0.209666	0.715672	-0.0376048	3965800000
Q62426	Cstb	Cystatin-B	0.718574	0.294697	0.111657	3963800000
Q61187	Tsg101	Tumor susceptibility gene 101 protein	3.8335	0.00104544	0.438318	380030000
Q3UPL0;Q3UPL0-2;Q3UPL0-3	Sec31a	Protein transport protein Sec31A	5.39866	6.43e-05	0.437925	1575300000
P50518;Q9D593	Atp6v1e1	V-type proton ATPase subunit E 1	6.6918	6.96e-06	0.437649	740110000
Q8BZW8	Nhlrc2	NHL repeat-containing protein 2	4.04137	0.000722185	0.435322	507060000
P42232;P42230	Stat5b;Stat5a	Signal transducer and activator of transcription 5B;Signal transducer and activator of transcription 5A	2.60685	0.00974388	0.433695	299940000
P54775	Psmc4	26S protease regulatory subunit 6B	0.797949	0.255871	-0.0939351	3899200000
Q8R574	Prpsap2	Phosphoribosyl pyrophosphate synthase-associated protein 2	4.50064	0.000317564	0.43357	1250600000
Q9Z0P5;Q9Z0P5-2	Twf2	Twinfilin-2	0.606506	0.361245	0.0603571	3884000000
Q9DB60	Fam213b	Prostamide/prostaglandin F synthase	2.73731	0.00775263	0.429563	194960000
Q8VCF0	Mavs	Mitochondrial antiviral-signaling protein	4.85831	0.000169697	0.429033	545080000
A2A8Z1;A2A8Z1-2	Osbpl9	Oxysterol-binding protein-related protein 9	4.67112	0.000232854	0.428479	142200000
Q6P069-2;Q6P069	Sri	Sorcin	0.344238	0.569567	0.0452855	3850900000
Q6A065;Q6A065-2;Q6A065-3	Cep170	Centrosomal protein of 170 kDa	3.69807	0.00131386	0.428431	350230000
P62281	Rps11	40S ribosomal protein S11	0.215244	0.710305	0.035077	3846900000
Q9D187	Fam96b	Mitotic spindle-associated MMXD complex subunit MIP18	2.25799	0.0185096	0.426032	100300000
Q8R5C5	Actr1b	Beta-centractin	1.8599	0.0379855	0.423967	270860000
P80318	Cct3	T-complex protein 1 subunit gamma	1.12941	0.140008	0.0654371	3832200000
P70297	Stam	Signal transducing adapter molecule 1	1.8561	0.0381998	0.423781	44060000
P04370-5;P04370-10;P04370-4;P04370-7;P04370-9;P04370-14;P04370-8;P04370-13;P04370-6;P04370-11;P04370;P04370-2	Mbp	Myelin basic protein	0.119822	0.830984	0.0346234	3813800000
O70310;O70311	Nmt1	Glycylpeptide N-tetradecanoyltransferase 1	6.12155	1.89e-05	0.42327	1255500000
Q6PIC6	Atp1a3	Sodium/potassium-transporting ATPase subunit alpha-3	0.419937	0.498321	0.105301	3805800000
Q9JJC6;Q99LE1	Rilpl1	RILP-like protein 1	2.41786	0.013807	0.422506	491730000
Q99M31;Q99M31-2	Hspa14	Heat shock 70 kDa protein 14	2.34544	0.0157165	0.420465	84508000
Q8R164	Bphl	Valacyclovir hydrolase	2.30764	0.0169286	0.42041	327650000
P61971	Nutf2	Nuclear transport factor 2	0.350022	0.564246	-0.0693259	3776300000
Q99J45	Nrbp1	Nuclear receptor-binding protein	3.35426	0.0024187	0.420109	83314000
Q9CZM2	Rpl15	60S ribosomal protein L15	0.0480219	0.926831	-0.0259052	3748800000
P70349	Hint1	Histidine triad nucleotide-binding protein 1	0.986664	0.180675	0.150238	3745800000
Q68FD5	Cltc	Clathrin heavy chain 1	8.72875	1.4e-07	0.41911	20229000000
O09061	Psmb1	Proteasome subunit beta type-1	1.0814	0.152587	-0.142305	3728400000
P61255	Rpl26	60S ribosomal protein L26	0.549361	0.398362	-0.109868	3720800000
P80315	Cct4	T-complex protein 1 subunit delta	1.30503	0.102005	0.129693	3718900000
Q6P9Q6;Q6P9Q6-2	Fkbp15	FK506-binding protein 15	5.74892	3.38e-05	0.417219	946800000
Q99K85	Psat1	Phosphoserine aminotransferase	2.40154	0.0142334	0.416835	1040200000
P63280	Ube2i	SUMO-conjugating enzyme UBC9	0.329096	0.585411	-0.0608406	3687100000
Q8C0J6	Sowahc	Ankyrin repeat domain-containing protein SOWAHC	2.29509	0.01729	0.415817	98984000
Q9WUM3	Coro1b	Coronin-1B	3.86047	0.000988477	0.414004	6698600000
Q9CWJ9	Atic	Bifunctional purine biosynthesis protein PURH;Phosphoribosylaminoimidazolecarboxamide formyltransferase;IMP cyclohydrolase	1.13684	0.138447	0.0862607	3672000000
Q9CZ44;Q9CZ44-3;Q9CZ44-2	Nsfl1c	NSFL1 cofactor p47	0.600355	0.364888	-0.052583	3665400000
Q8BMS1	Hadha	Trifunctional enzyme subunit alpha, mitochondrial;Long-chain enoyl-CoA hydratase;Long chain 3-hydroxyacyl-CoA dehydrogenase	5.05518	0.00012229	0.41388	6238000000
Q9DCX2	Atp5h	ATP synthase subunit d, mitochondrial	5.86921	2.85e-05	0.413408	2809800000
Q8CGK3	Lonp1	Lon protease homolog, mitochondrial	4.89321	0.000159703	0.413328	439510000
Q9D1D4;Q9D1D4-2	Tmed10	Transmembrane emp24 domain-containing protein 10	0.232149	0.690478	0.0408609	3643600000
O88685	Psmc3	26S protease regulatory subunit 6A	0.141074	0.80327	-0.0184166	3639200000
Q91YS8	Camk1	Calcium/calmodulin-dependent protein kinase type 1	4.28849	0.000454358	0.412768	1714500000
P54071	Idh2	Isocitrate dehydrogenase [NADP], mitochondrial	6.33346	1.38e-05	0.412273	6127900000
Q61425	Hadh	Hydroxyacyl-coenzyme A dehydrogenase, mitochondrial	3.2728	0.00286015	0.411948	1011200000
Q8R3V5-1;Q8R3V5;Q8R3V5-3	Sh3glb2	Endophilin-B2	2.84037	0.00637517	0.411304	171890000
P28656	Nap1l1	Nucleosome assembly protein 1-like 1	5.34198	7.13e-05	0.408525	579250000
P51660	Hsd17b4	Peroxisomal multifunctional enzyme type 2;(3R)-hydroxyacyl-CoA dehydrogenase;Enoyl-CoA hydratase 2	8.88819	1.05e-07	0.407313	3513000000
Q9R112	Sqrdl	Sulfide:quinone oxidoreductase, mitochondrial	7.06341	3.59e-06	0.40647	1713000000
P68369;P05214	Tuba1a;Tuba3a	Tubulin alpha-1A chain;Tubulin alpha-3 chain	3.20105	0.00326473	0.405736	821590000
Q7TSV4	Pgm2	Phosphoglucomutase-2	0.573905	0.382591	0.0561866	3556900000
Q923D2	Blvrb	Flavin reductase (NADPH)	0.53206	0.410246	0.0939578	3552800000
P47738;P24549;Q9JHW9	Aldh2	Aldehyde dehydrogenase, mitochondrial	4.95505	0.000143224	0.40562	2274500000
Q91WG2;Q91WG2-1;Q91WG2-2	Rabep2	Rab GTPase-binding effector protein 2	3.20684	0.00323095	0.404554	193060000
Q6P8X1	Snx6	Sorting nexin-6;Sorting nexin-6, N-terminally processed	2.37588	0.0149177	0.404455	576660000
Q6PB66	Lrpprc	Leucine-rich PPR motif-containing protein, mitochondrial	4.72946	0.000211885	0.403457	653780000
P51150	Rab7a	Ras-related protein Rab-7a	4.82019	0.000180555	0.402591	3874300000
P53996-2;P53996-3	Cnbp	Cellular nucleic acid-binding protein	0.0488385	0.925385	0.0153332	3480300000
Q8C3J5	Dock2	Dedicator of cytokinesis protein 2	8.40725	2.76e-07	0.402512	6590500000
P12787	Cox5a	Cytochrome c oxidase subunit 5A, mitochondrial	7.17951	3.03e-06	0.401935	3574600000
P63168	Dynll1	Dynein light chain 1, cytoplasmic	0.779486	0.264005	-0.164528	3458600000
Q9JIF7	Copb1	Coatomer subunit beta	6.8858	4.83e-06	0.401117	1102200000
Q76MZ3	Ppp2r1a	Serine/threonine-protein phosphatase 2A 65 kDa regulatory subunit A alpha isoform	0.59042	0.371589	0.0699855	3429400000
Q6P5E4	Uggt1	UDP-glucose:glycoprotein glucosyltransferase 1	1.01946	0.169926	0.0798283	3428600000
Q8R2V5	Adap2	Arf-GAP with dual PH domain-containing protein 2	5.2111	9.15e-05	0.400802	872330000
Q8BU30	Iars	Isoleucine--tRNA ligase, cytoplasmic	2.38151	0.0147847	0.400759	293460000
Q3TCJ1	Fam175b	BRISC complex subunit Abro1	2.65112	0.00905241	0.400424	295140000
Q3UVG3	Fam91a1	Protein FAM91A1	4.01757	0.000756066	0.399764	174150000
P24668	M6pr	Cation-dependent mannose-6-phosphate receptor	4.46833	0.000330496	0.399543	987020000
Q3USB7	Plcl1	Inactive phospholipase C-like protein 1	1.99173	0.0299815	0.398757	162520000
Q58A65-2;Q58A65-5;Q58A65;Q58A65-6;Q58A65-3;Q58A65-4	Spag9	C-Jun-amino-terminal kinase-interacting protein 4	1.72706	0.0484052	0.39744	112530000
Q6ZWV3;P86048	Rpl10;Rpl10l	60S ribosomal protein L10;60S ribosomal protein L10-like	0.535001	0.408485	0.0901273	3347900000
Q9Z0X1	Aifm1	Apoptosis-inducing factor 1, mitochondrial	2.63944	0.00920161	0.396413	219840000
Q9D6J6;Q9D6J6-2	Ndufv2	NADH dehydrogenase [ubiquinone] flavoprotein 2, mitochondrial	3.99671	0.000781068	0.396224	388900000
P59999	Arpc4	Actin-related protein 2/3 complex subunit 4	1.06849	0.15576	0.110818	3319600000
Q60597;Q60597-3;Q60597-2;Q60597-4	Ogdh	2-oxoglutarate dehydrogenase, mitochondrial	6.50072	1e-05	0.395743	1867400000
Q99J77	Nans		0.794856	0.256648	-0.0852415	3313600000
Q80UM7	Mogs	Mannosyl-oligosaccharide glucosidase	4.41927	0.000359138	0.395634	758860000
Q9R0U0-3;Q9R0U0-2;Q9R0U0	Srsf10	Serine/arginine-rich splicing factor 10	0.909	0.209228	-0.13034	3290700000
Q9DBP5	Cmpk1	UMP-CMP kinase	0.830021	0.241396	-0.0637795	3284600000
Q99MN9	Pccb	Propionyl-CoA carboxylase beta chain, mitochondrial	3.07492	0.00415736	0.39517	282480000
Q78J03	Msrb2	Methionine-R-sulfoxide reductase B2, mitochondrial	3.39241	0.00228137	0.394137	221120000
Q99LY9	Ndufs5	NADH dehydrogenase [ubiquinone] iron-sulfur protein 5;NADH dehydrogenase [ubiquinone] iron-sulfur protein 5, N-terminally processed	2.86009	0.00619282	0.393762	442190000
Q80VP1;Q80VP1-2;Q91W69	Epn1	Epsin-1	2.35104	0.015568	0.393341	374440000
P00405	Mtco2	Cytochrome c oxidase subunit 2	2.5508	0.0108202	0.392696	1228200000
Q8BRF7;Q8BRF7-3;Q8BRF7-2	Scfd1	Sec1 family domain-containing protein 1	4.93964	0.000147379	0.390143	503060000
Q9CQE8		UPF0568 protein C14orf166 homolog	0.0119443	0.980097	0.00208526	3240000000
Q8VDM4	Psmd2	26S proteasome non-ATPase regulatory subunit 2	0.194888	0.732034	-0.0295151	3227700000
P41105	Rpl28	60S ribosomal protein L28	0.247793	0.673474	-0.0518604	3208300000
O55143;O55143-2;Q64518-2;Q64518-3;Q64518	Atp2a2	Sarcoplasmic/endoplasmic reticulum calcium ATPase 2	1.52849	0.0683577	0.118235	3207100000
P50544	Acadvl	Very long-chain specific acyl-CoA dehydrogenase, mitochondrial	2.99029	0.00486808	0.389596	551380000
Q8BH43;Q8R5H6	Wasf2	Wiskott-Aldrich syndrome protein family member 2	6.85571	5.12e-06	0.38893	3781000000
Q9QXK3;Q9QXK3-4;Q9QXK3-3;Q9QXK3-2	Copg2	Coatomer subunit gamma-2	3.16147	0.00352443	0.388421	834520000
P56399	Usp5	Ubiquitin carboxyl-terminal hydrolase 5	0.954104	0.192447	0.0777529	3189300000
Q9R0P3	Esd	S-formylglutathione hydrolase	0.17389	0.759653	-0.0289655	3187200000
Q9CR57	Rpl14	60S ribosomal protein L14	0.456986	0.468412	0.0543507	3184300000
Q9DB05;P28663	Napa	Alpha-soluble NSF attachment protein	5.23404	8.76e-05	0.386803	1107200000
Q5SXY1;Q5SXY1-2;Q5SXY1-3	Specc1	Cytospin-B	4.54472	0.000292498	0.385649	2067400000
P61164	Actr1a	Alpha-centractin	3.27279	0.00286015	0.383794	1437800000
P11983;P11983-2	Tcp1	T-complex protein 1 subunit alpha	0.315597	0.598572	0.0343739	3170600000
P97822-2;P97822;P97822-3	Anp32e	Acidic leucine-rich nuclear phosphoprotein 32 family member E	0.00144893	0.998084	-0.000323613	3170200000
Q8R0J7	Vps37b	Vacuolar protein sorting-associated protein 37B	2.04282	0.0273619	0.382192	261100000
P54823	Ddx6	Probable ATP-dependent RNA helicase DDX6	4.49017	0.000322281	0.380123	942850000
O70435	Psma3	Proteasome subunit alpha type-3	0.488706	0.443518	-0.0851523	3130100000
Q62087	Pon3	Serum paraoxonase/lactonase 3	0.412518	0.505019	0.0545305	3126200000
O08807	Prdx4	Peroxiredoxin-4	1.23388	0.116293	-0.14127	3111600000
P60867	Rps20	40S ribosomal protein S20	0.688018	0.311817	0.197094	3104000000
Q8K1X4	Nckap1l		3.48323	0.00193855	0.380041	3357800000
Q8BHD7-2;Q8BHD7	Ptbp3	Polypyrimidine tract-binding protein 3	1.43354	0.0807816	-0.089631	3085400000
P68254;P68254-2	Ywhaq	14-3-3 protein theta	1.19274	0.1253	0.162147	3085100000
Q07417	Acads	Short-chain specific acyl-CoA dehydrogenase, mitochondrial	4.67992	0.000229368	0.378298	3843800000
Q8BL66	Eea1	Early endosome antigen 1	4.22658	0.00051055	0.376675	1153400000
Q9D0S9	Hint2	Histidine triad nucleotide-binding protein 2, mitochondrial	2.01923	0.0284748	0.375202	184920000
P62908	Rps3	40S ribosomal protein S3	1.58025	0.0622137	0.102344	3042300000
P63276	Rps17	40S ribosomal protein S17	0.288148	0.628796	-0.0305526	3035000000
Q8CI94	Pygb	Glycogen phosphorylase, brain form	5.2509	8.49e-05	0.375184	1220600000
O88844	Idh1	Isocitrate dehydrogenase [NADP] cytoplasmic	1.61853	0.0585881	0.109206	3030300000
Q9CRC9;Q9CRC9-2	Gnpda2	Glucosamine-6-phosphate isomerase 2	3.71168	0.00129011	0.375112	279110000
P62270	Rps18	40S ribosomal protein S18	1.15516	0.133883	0.142467	2984300000
Q8R146-2;Q8R146	Apeh	Acylamino-acid-releasing enzyme	2.61497	0.0096171	0.374758	855860000
Q6DFW4	Nop58	Nucleolar protein 58	1.43736	0.0802232	-0.17934	2959800000
Q8BH95	Echs1	Enoyl-CoA hydratase, mitochondrial	3.93477	0.000862863	0.374402	3157400000
Q8BSY0;Q8BSY0-2	Asph	Aspartyl/asparaginyl beta-hydroxylase	1.11626	0.143178	-0.0909675	2947100000
Q8CCJ3;Q8CCJ3-1;Q8CCJ3-2	Ufl1	E3 UFM1-protein ligase 1	2.07712	0.0258145	0.374259	281640000
P62852	Rps25	40S ribosomal protein S25	0.531681	0.410246	0.0803617	2938000000
P12382;Q9WUA3-2;Q9WUA3	Pfkl	ATP-dependent 6-phosphofructokinase, liver type	3.01693	0.00463415	0.374062	1032900000
Q61584-4;Q61584-7;Q61584-3;Q61584;Q61584-5;Q61584-6;Q61584-2	Fxr1	Fragile X mental retardation syndrome-related protein 1	4.33272	0.000419921	0.373142	483390000
Q7TSI3	Ppp6r1	Serine/threonine-protein phosphatase 6 regulatory subunit 1	3.768	0.00115941	0.372625	900150000
Q6ZQ38	Cand1	Cullin-associated NEDD8-dissociated protein 1	1.24367	0.114153	0.0782726	2910800000
Q8VCT3	Rnpep	Aminopeptidase B	1.35846	0.0926302	0.153877	2898900000
Q8K2F8	Lsm14a	Protein LSM14 homolog A	3.10581	0.00394909	0.372287	349910000
Q9CQ75	Ndufa2	NADH dehydrogenase [ubiquinone] 1 alpha subcomplex subunit 2	1.88423	0.0364849	0.372258	378660000
Q8VE88-2;Q8VE88	Fam114a2	Protein FAM114A2	2.97037	0.00505859	0.371796	350550000
Q99P72;Q99P72-3;Q99P72-5;Q99P72-4;Q99P72-1	Rtn4	Reticulon-4	4.43597	0.000350272	0.371377	590100000
P56395	Cyb5a	Cytochrome b5	1.31944	0.0996651	0.111756	2881200000
P62900	Rpl31	60S ribosomal protein L31	0.0284814	0.956317	-0.0101679	2865400000
Q8BGC4	Zadh2	Zinc-binding alcohol dehydrogenase domain-containing protein 2	0.0682213	0.902156	0.174796	2865100000
P63323	Rps12	40S ribosomal protein S12	4.84237	0.000173643	0.370318	4541700000
P46460	Nsf	Vesicle-fusing ATPase	6.41825	1.17e-05	0.369437	1717500000
Q9CPU0	Glo1	Lactoylglutathione lyase	1.05486	0.159326	0.183643	2854900000
Q3U1J4	Ddb1	DNA damage-binding protein 1	0.932161	0.200452	-0.076661	2851700000
Q9R0Q7	Ptges3	Prostaglandin E synthase 3	0.321551	0.592919	0.0691338	2851500000
P50580;P50580-2	Pa2g4	Proliferation-associated protein 2G4	1.4636	0.0767629	0.102952	2850000000
Q9D855	Uqcrb	Cytochrome b-c1 complex subunit 7	1.7735	0.0446055	0.368992	930980000
Q9JLQ2	Git2	ARF GTPase-activating protein GIT2	7.78233	9.87e-07	0.368732	2009400000
Q9QZE5	Copg1	Coatomer subunit gamma-1	4.33321	0.000419921	0.368369	800860000
Q8K4I3	Arhgef6	Rho guanine nucleotide exchange factor 6	5.11026	0.0001126	0.368333	1168800000
Q99LT0	Dpy30	Protein dpy-30 homolog	1.44744	0.0787254	-0.171546	2814500000
P63260	Actg1	Actin, cytoplasmic 2;Actin, cytoplasmic 2, N-terminally processed	0.0691629	0.901962	0.100342	2813500000
O08539-2;O08539	Bin1	Myc box-dependent-interacting protein 1	7.2925	2.46e-06	0.368076	19383000000
O70309;O70309-2	Itgb5	Integrin beta-5	0.549867	0.398171	-0.0640033	2800800000
Q9Z2I8-2;Q9Z2I8	Suclg2	Succinyl-CoA ligase [GDP-forming] subunit beta, mitochondrial	3.09967	0.00399391	0.367961	699990000
P24369	Ppib	Peptidyl-prolyl cis-trans isomerase B	0.000509179	0.999323	0.000209067	2781700000
Q9Z2I0	Letm1	LETM1 and EF-hand domain-containing protein 1, mitochondrial	2.98964	0.0048681	0.367868	335810000
O70370	Ctss	Cathepsin S	3.57051	0.00164332	0.36759	2996200000
O08553;Q62188;O35098	Dpysl2	Dihydropyrimidinase-related protein 2	6.68519	7e-06	0.367426	38597000000
P62196	Psmc5	26S protease regulatory subunit 8	1.177	0.12935	-0.090734	2750200000
P14131	Rps16	40S ribosomal protein S16	0.0384492	0.940335	0.00900443	2749000000
Q9CQ62	Decr1	2,4-dienoyl-CoA reductase, mitochondrial	4.35159	0.000409839	0.36671	557210000
P70315	Was	Wiskott-Aldrich syndrome protein homolog	2.87762	0.00602456	0.366212	645170000
Q6P5F9	Xpo1	Exportin-1	1.40847	0.0846348	-0.180636	2731800000
Q6ZWY3	Rps27l	40S ribosomal protein S27-like	2.76537	0.00736518	0.366182	1411900000
O08788-2;O08788	Dctn1	Dynactin subunit 1	2.86598	0.00613282	0.36524	1351100000
P56391	Cox6b1	Cytochrome c oxidase subunit 6B1	4.76148	0.000200274	0.36474	2071500000
P99027	Rplp2	60S acidic ribosomal protein P2	3.60148	0.00156048	0.364731	8676500000
P97429	Anxa4	Annexin A4	0.299805	0.615338	0.0654336	2711500000
Q9CQF3	Nudt21	Cleavage and polyadenylation specificity factor subunit 5	1.69963	0.0507085	-0.202776	2708500000
O70566	Diaph2	Protein diaphanous homolog 2	1.9771	0.0307523	0.364636	274840000
P10853;Q8CGP2;Q8CGP2-2;P70696	Hist1h2bf;Hist1h2bp;Hist1h2ba	Histone H2B type 1-F/J/L;Histone H2B type 1-P;Histone H2B type 1-A	0.137682	0.807787	0.127338	2693100000
P46471	Psmc2	26S protease regulatory subunit 7	1.39411	0.0866804	-0.122647	2677000000
P14576;P14576-2	Srp54	Signal recognition particle 54 kDa protein	4.01509	0.000757107	0.364604	637850000
P17710-3;P17710-4;P17710;P17710-2	Hk1	Hexokinase-1	5.85222	2.93e-05	0.364254	1155300000
Q9WV32	Arpc1b	Actin-related protein 2/3 complex subunit 1B	5.76795	3.31e-05	0.363088	8235700000
Q99JY0	Hadhb	Trifunctional enzyme subunit beta, mitochondrial;3-ketoacyl-CoA thiolase	5.33207	7.23e-05	0.361722	3202500000
P34884	Mif	Macrophage migration inhibitory factor	1.39238	0.0868194	0.150732	2653800000
Q9CPX6	Atg3	Ubiquitin-like-conjugating enzyme ATG3	1.78019	0.0441236	0.361301	181310000
P47753	Capza1	F-actin-capping protein subunit alpha-1	1.33434	0.0967019	0.199469	2645700000
Q80XU3	Nucks1	Nuclear ubiquitous casein and cyclin-dependent kinase substrate 1	0.106453	0.849838	-0.0326939	2620400000
Q6ZWM4	Lsm8	U6 snRNA-associated Sm-like protein LSm8	0.871222	0.224748	-0.227078	2619800000
P62192	Psmc1	26S protease regulatory subunit 4	0.200436	0.725335	-0.0247456	2616700000
P80313	Cct7	T-complex protein 1 subunit eta	1.15533	0.133883	0.112287	2609800000
Q8K1E0-2;Q8K1E0	Stx5	Syntaxin-5	1.85377	0.0383755	0.36105	154060000
P61089;Q9CQ37	Ube2n	Ubiquitin-conjugating enzyme E2 N	0.56508	0.388196	0.0854833	2607100000
P84099	Rpl19	60S ribosomal protein L19	0.555799	0.394235	0.148835	2606900000
Q91V92	Acly	ATP-citrate synthase	0.811531	0.249814	-0.0943301	2604700000
P47199	Cryz	Quinone oxidoreductase	6.2486	1.53e-05	0.360929	1474000000
Q8BVE3	Atp6v1h	V-type proton ATPase subunit H	2.35478	0.0155046	0.360513	379640000
Q5SSZ5;Q5SSZ5-2;Q8CGB6-2;Q8CGB6-4;Q8CGB6;Q8CGB6-3	Tns3	Tensin-3	2.51929	0.0114718	0.360045	550110000
P53026	Rpl10a	60S ribosomal protein L10a	0.994838	0.177925	0.139374	2593500000
P58021	Tm9sf2	Transmembrane 9 superfamily member 2	2.02311	0.0282689	0.359523	272310000
P14106	C1qb	Complement C1q subcomponent subunit B	0.86646	0.226344	0.105894	2572100000
P62267	Rps23	40S ribosomal protein S23	0.467412	0.460807	-0.178203	2569200000
Q8BVI4	Qdpr	Dihydropteridine reductase	1.68406	0.0521892	0.194471	2562200000
Q9CWZ7	Napg	Gamma-soluble NSF attachment protein	3.3545	0.0024187	0.359433	263780000
Q8R1Q8	Dync1li1	Cytoplasmic dynein 1 light intermediate chain 1	2.05803	0.0265791	0.35914	633740000
Q6Y685;Q6Y685-2;Q9JJG0-4;Q9JJG0-3;Q9JJG0-2;Q9JJG0	Tacc1	Transforming acidic coiled-coil-containing protein 1	2.43259	0.0134627	0.35685	462440000
Q8BG32	Psmd11	26S proteasome non-ATPase regulatory subunit 11	0.221902	0.702073	0.0217609	2552000000
Q9ER00	Stx12	Syntaxin-12	4.54873	0.000291509	0.355697	409930000
O35601;O35601-2	Fyb	FYN-binding protein	0.974986	0.18459	0.152808	2546000000
O55023	Impa1	Inositol monophosphatase 1	0.817636	0.247349	0.0944802	2535600000
Q9CXY6	Ilf2	Interleukin enhancer-binding factor 2	1.09102	0.15006	-0.160998	2521400000
Q921E2	Rab31	Ras-related protein Rab-31	3.71412	0.00128532	0.355551	304950000
Q9D8B3;Q9D7F7	Chmp4b	Charged multivesicular body protein 4b	1.19186	0.125415	-0.109069	2515200000
P31938	Map2k1	Dual specificity mitogen-activated protein kinase kinase 1	0.259979	0.659306	0.0500802	2513100000
Q9CQR2	Rps21	40S ribosomal protein S21	3.0591	0.00427533	0.355254	2423700000
P61205	Arf3	ADP-ribosylation factor 3	3.19752	0.00328169	0.353281	2044600000
Q62446	Fkbp3	Peptidyl-prolyl cis-trans isomerase FKBP3	3.73201	0.00124047	0.352938	957800000
P61222	Abce1	ATP-binding cassette sub-family E member 1	3.40667	0.00222675	0.352872	907420000
P62309	Snrpg	Small nuclear ribonucleoprotein G	0.59734	0.366825	-0.154954	2505000000
Q9CY58;Q9CY58-2;Q9CY58-3;Q9CY58-4	Serbp1	Plasminogen activator inhibitor 1 RNA-binding protein	1.25702	0.111454	0.202156	2501000000
Q9D0F3	Lman1	Protein ERGIC-53	6.31756	1.4e-05	0.351856	778840000
Q64522	Hist2h2ab	Histone H2A type 2-B	0.741456	0.283273	-0.899148	2489900000
P28650;P28650-2	Adssl1	Adenylosuccinate synthetase isozyme 1	0.57616	0.381236	-0.107512	2485600000
Q9JHJ0;Q9JKK7-3;Q9JKK7;P49813	Tmod3	Tropomodulin-3	2.3022	0.0171084	0.351809	375050000
Q7TQD2	Tppp	Tubulin polymerization-promoting protein	0.17746	0.755377	0.0330401	2475400000
Q8CFX1	H6pd	GDH/6PGL endoplasmic bifunctional protein;Glucose 1-dehydrogenase;6-phosphogluconolactonase	2.08375	0.0254897	0.351454	116320000
Q7TMM9	Tubb2a	Tubulin beta-2A chain	2.15015	0.0224667	0.351194	6094400000
O55029	Copb2	Coatomer subunit beta	4.72624	0.000212332	0.350668	1745900000
P19783	Cox4i1	Cytochrome c oxidase subunit 4 isoform 1, mitochondrial	0.726175	0.290855	0.117837	2434300000
O70145	Ncf2	Neutrophil cytosol factor 2	4.96152	0.000142732	0.350664	1761300000
Q9CZY3;Q9CZY3-2	Ube2v1	Ubiquitin-conjugating enzyme E2 variant 1	0.608443	0.360234	0.0929731	2433800000
Q8K3J1	Ndufs8	NADH dehydrogenase [ubiquinone] iron-sulfur protein 8, mitochondrial	2.93262	0.00540542	0.350196	231150000
Q6NSR8	Npepl1	Probable aminopeptidase NPEPL1	0.172272	0.761754	-0.0379909	2425800000
Q9DBR7;Q9DBR7-2;Q8BG95	Ppp1r12a	Protein phosphatase 1 regulatory subunit 12A	3.5444	0.00173013	0.350058	1082900000
O88587-2;O88587	Comt	Catechol O-methyltransferase	1.15033	0.13508	0.172107	2417900000
P63085;Q6P5G0;Q61532	Mapk1	Mitogen-activated protein kinase 1	0.103754	0.852512	0.0153964	2417100000
Q8R0X7	Sgpl1	Sphingosine-1-phosphate lyase 1	0.32207	0.592452	0.0500013	2411700000
Q5XJY5	Arcn1	Coatomer subunit delta	4.79705	0.0001876	0.349789	1997700000
Q8VDK1-2	Nit1	Nitrilase homolog 1	3.55971	0.00167598	0.349474	515030000
P62960;Q9Z2C8-2;Q9Z2C8	Ybx1	Nuclease-sensitive element-binding protein 1	1.68437	0.0521892	0.226142	2400900000
Q6NZC7	Sec23ip	SEC23-interacting protein	1.75381	0.0461775	0.348926	359050000
Q9CZU3	Skiv2l2	Superkiller viralicidic activity 2-like 2	1.6503	0.0553332	-0.157635	2370200000
Q9JIY5	Htra2	Serine protease HTRA2, mitochondrial	2.59956	0.00986478	0.348606	241360000
Q9CZ04;Q9CZ04-2	Cops7a	COP9 signalosome complex subunit 7a	2.16454	0.021892	0.348384	486250000
Q8BGQ7	Aars	Alanine--tRNA ligase, cytoplasmic	6.3916	1.23e-05	0.347683	1878500000
Q9CQA3	Sdhb	Succinate dehydrogenase [ubiquinone] iron-sulfur subunit, mitochondrial	2.94778	0.00528233	0.347652	1827000000
Q3ULJ0-2;Q3ULJ0;Q6NXY9	Gpd1l	Glycerol-3-phosphate dehydrogenase 1-like protein	1.0761	0.154092	0.11294	2336800000
P24270	Cat	Catalase	3.94637	0.000852696	0.347632	2916400000
Q810D6	Grwd1	Glutamate-rich WD repeat-containing protein 1	0.0228569	0.966265	-0.00759321	2332900000
Q9WTX5	Skp1	S-phase kinase-associated protein 1	1.6597	0.0543775	0.200179	2330700000
Q9Z0H8-2;Q9Z0H8	Clip2	CAP-Gly domain-containing linker protein 2	2.27075	0.0180768	0.346476	431090000
Q8BG05	Hnrnpa3	Heterogeneous nuclear ribonucleoprotein A3	0.793816	0.25703	-0.297785	2324900000
Q9CQC6	Bzw1	Basic leucine zipper and W2 domain-containing protein 1	2.07591	0.0258637	0.345936	444670000
Q91ZV0-3;Q91ZV0	Mia2	Melanoma inhibitory activity protein 2	2.00208	0.029472	0.343949	312280000
Q9D5T0	Atad1	ATPase family AAA domain-containing protein 1	3.22229	0.0031412	0.34373	141460000
Q9EQK5	Mvp	Major vault protein	3.02788	0.00454297	0.343436	318700000
P27870;Q9R0C8-4;Q9R0C8	Vav1	Proto-oncogene vav	0.670153	0.321447	0.0923608	2314900000
Q9CQN1	Trap1	Heat shock protein 75 kDa, mitochondrial	2.82237	0.00659533	0.342988	156690000
Q9Z108	Stau1	Double-stranded RNA-binding protein Staufen homolog 1	2.76535	0.00736518	0.34175	151520000
P39054;P39054-2	Dnm2	Dynamin-2	6.10849	1.91e-05	0.340924	3810300000
P32921-2;P32921	Wars	Tryptophan--tRNA ligase, cytoplasmic;T1-TrpRS;T2-TrpRS	3.53125	0.00177418	0.339657	1017000000
Q8CIE6	Copa	Coatomer subunit alpha;Xenin;Proxenin	6.37162	1.28e-05	0.339206	3558800000
P38647	Hspa9	Stress-70 protein, mitochondrial	7.88989	8.26e-07	0.338921	4355000000
O35955	Psmb10	Proteasome subunit beta type-10	0.377301	0.537791	-0.063796	2295500000
P62334	Psmc6	26S protease regulatory subunit 10B	0.0529147	0.921735	0.0108198	2293600000
Q8BPU7;Q8BPU7-3;Q8BPU7-2;Q8BPU7-4;Q8BHL5-2;Q8BHL5;Q8BHL5-3	Elmo1	Engulfment and cell motility protein 1	5.77207	3.31e-05	0.338359	6502500000
Q3TXS7	Psmd1	26S proteasome non-ATPase regulatory subunit 1	1.24988	0.112851	-0.11861	2286800000
P70429;P70429-2	Evl	Ena/VASP-like protein	1.47082	0.0758256	0.205938	2286400000
Q9D0I9	Rars	Arginine--tRNA ligase, cytoplasmic	3.82571	0.00106009	0.336708	891180000
Q9CQZ1	Hsbp1	Heat shock factor-binding protein 1	1.84681	0.0389048	0.336371	375210000
Q64105	Spr	Sepiapterin reductase	0.0499883	0.924839	0.00617284	2269400000
Q9JHU4	Dync1h1	Cytoplasmic dynein 1 heavy chain 1	6.9723	4.22e-06	0.335442	6354200000
Q91ZR1;P56371	Rab4b	Ras-related protein Rab-4B	1.90709	0.0350869	0.334784	156710000
P67984	Rpl22	60S ribosomal protein L22	0.209566	0.715672	0.0434616	2258500000
P62889	Rpl30	60S ribosomal protein L30	1.28156	0.106118	0.14318	2241200000
Q9DAK9	Phpt1	14 kDa phosphohistidine phosphatase	0.228637	0.693997	0.0365091	2240600000
O08749	Dld	Dihydrolipoyl dehydrogenase, mitochondrial	1.49887	0.0722377	0.184475	2236300000
Q9DBG3;Q9DBG3-2	Ap2b1	AP-2 complex subunit beta	3.33333	0.00252252	0.334771	1062100000
P53810	Pitpna	Phosphatidylinositol transfer protein alpha isoform	1.08259	0.15228	0.101498	2233500000
E9Q557	Dsp	Desmoplakin	0.337145	0.576477	0.436369	2231700000
Q99JI6	Rap1b	Ras-related protein Rap-1b	1.22971	0.117085	0.0964274	2228100000
Q6PDL0	Dync1li2	Cytoplasmic dynein 1 light intermediate chain 2	2.17848	0.0213947	0.334689	303330000
P47915	Rpl29	60S ribosomal protein L29	0.191147	0.736929	-0.142436	2222800000
Q91V61;Q91V61-2	Sfxn3	Sideroflexin-3	4.45292	0.000338706	0.334629	701190000
P14685	Psmd3	26S proteasome non-ATPase regulatory subunit 3	1.17614	0.129464	-0.128402	2217100000
P53994;P59279	Rab2a;Rab2b	Ras-related protein Rab-2A;Ras-related protein Rab-2B	3.59031	0.00158764	0.333923	725200000
Q64152-2;Q64152	Btf3	Transcription factor BTF3	2.17904	0.0213865	0.333277	818030000
Q8C0I1	Agps	Alkyldihydroxyacetonephosphate synthase, peroxisomal	3.33802	0.00249927	0.332034	544930000
Q9WUM4	Coro1c	Coronin-1C	1.62506	0.0579133	0.11813	2196500000
P20108	Prdx3	Thioredoxin-dependent peroxide reductase, mitochondrial	3.44443	0.00207799	0.331997	1749400000
Q8K0T0	Rtn1	Reticulon-1	1.89132	0.0361234	0.331087	1034600000
P28867;P28867-2	Prkcd	Protein kinase C delta type;Protein kinase C delta type regulatory subunit;Protein kinase C delta type catalytic subunit	0.0417651	0.935103	-0.00818366	2184100000
P14115	Rpl27a	60S ribosomal protein L27a	0.0734909	0.895111	0.019432	2180700000
P53395	Dbt	Lipoamide acyltransferase component of branched-chain alpha-keto acid dehydrogenase complex, mitochondrial	3.90621	0.00090814	0.330338	247750000
P45377	Akr1b8	Aldose reductase-related protein 2	0.0602227	0.912697	-0.0155466	2140900000
Q9QXA5	Lsm4	U6 snRNA-associated Sm-like protein LSm4	0.809466	0.250307	-0.122488	2125300000
Q8BYW1-3;Q8BYW1;Q8BYW1-2	Arhgap25	Rho GTPase-activating protein 25	3.04117	0.00443891	0.330232	690310000
Q8BVW0	Ganc	Neutral alpha-glucosidase C	0.802315	0.253775	-0.116044	2120200000
P97369	Ncf4	Neutrophil cytosol factor 4	2.38947	0.0145605	0.330053	699550000
Q91YT0	Ndufv1	NADH dehydrogenase [ubiquinone] flavoprotein 1, mitochondrial	4.42669	0.000355907	0.329862	965930000
O89110	Casp8	Caspase-8;Caspase-8 subunit p18;Caspase-8 subunit p10	4.95614	0.000143224	0.328159	987700000
Q922J3;Q922J3-2	Clip1	CAP-Gly domain-containing linker protein 1	2.75819	0.0074424	0.328139	782620000
P21460	Cst3	Cystatin-C	6.0312	2.13e-05	0.32745	8050200000
Q80U87	Usp8	Ubiquitin carboxyl-terminal hydrolase 8	2.63573	0.00925128	0.32675	205990000
P97855	G3bp1	Ras GTPase-activating protein-binding protein 1	4.22859	0.000509444	0.32668	1811900000
O35129	Phb2	Prohibitin-2	3.93875	0.000861857	0.326189	1415600000
Q3TIV5;Q3TIV5-2;Q3TIV5-3	Zc3h15	Zinc finger CCCH domain-containing protein 15	2.36478	0.0152123	0.326167	164890000
Q9CVB6	Arpc2	Actin-related protein 2/3 complex subunit 2	2.97618	0.00500119	0.325273	3868100000
Q3UZA1-2;Q3UZA1	Rcsd1	CapZ-interacting protein	2.57701	0.0102989	0.325236	980180000
Q9JJV0	Cryba4	Beta-crystallin A4	1.30889	0.101517	0.125087	2069200000
P63028	Tpt1	Translationally-controlled tumor protein	3.37408	0.0023435	0.325217	1777200000
Q61206	Pafah1b2	Platelet-activating factor acetylhydrolase IB subunit beta	2.45088	0.0130092	0.324692	792720000
Q921G7	Etfdh	Electron transfer flavoprotein-ubiquinone oxidoreductase, mitochondrial	4.98931	0.000135897	0.324255	672530000
P62874;Q61011	Gnb1	Guanine nucleotide-binding protein G(I)/G(S)/G(T) subunit beta-1	0.171786	0.762352	0.0350849	2057600000
Q6P9R2	Oxsr1	Serine/threonine-protein kinase OSR1	2.79076	0.00699773	0.323942	320770000
P51881	Slc25a5	ADP/ATP translocase 2;ADP/ATP translocase 2, N-terminally processed	5.45488	5.82e-05	0.322958	13200000000
Q9Z0N1;Q9Z0N2	Eif2s3x;Eif2s3y	Eukaryotic translation initiation factor 2 subunit 3, X-linked;Eukaryotic translation initiation factor 2 subunit 3, Y-linked	0.0422135	0.934943	0.00748173	2051100000
P60605	Ube2g2	Ubiquitin-conjugating enzyme E2 G2	1.95596	0.0318908	0.322746	183550000
Q9CYZ2	Tpd52l2	Tumor protein D54	2.84676	0.00631049	0.322312	882030000
Q91ZA3	Pcca	Propionyl-CoA carboxylase alpha chain, mitochondrial	3.33914	0.00249669	0.321841	689010000
Q3TW96	Uap1l1	UDP-N-acetylhexosamine pyrophosphorylase-like protein 1	5.0772	0.000118105	0.32105	2109300000
Q60973	Rbbp7	Histone-binding protein RBBP7	0.952315	0.192957	-0.127517	2039200000
Q62418-2;Q62418-3;Q62418	Dbnl	Drebrin-like protein	4.00736	0.000767196	0.320828	3181400000
P45878	Fkbp2	Peptidyl-prolyl cis-trans isomerase FKBP2	2.32905	0.0162726	0.320253	1015400000
Q8BFY9-2;Q8BFY9	Tnpo1	Transportin-1	0.0495747	0.925064	0.00967307	2027400000
Q8BP67	Rpl24	60S ribosomal protein L24	0.275812	0.643966	0.0569094	2024900000
Q99L27	Gmpr2	GMP reductase 2	0.0162029	0.97415	0.00326215	2024800000
B2RXR6;Q505D1	Ankrd44	Serine/threonine-protein phosphatase 6 regulatory ankyrin repeat subunit B	5.03787	0.000125779	0.320093	1915800000
Q9CR16	Ppid	Peptidyl-prolyl cis-trans isomerase D	0.90088	0.21253	0.0739274	2013100000
Q9R1P3	Psmb2	Proteasome subunit beta type-2	0.355929	0.558423	-0.0776142	2012900000
Q9D1G1	Rab1b	Ras-related protein Rab-1B	2.89223	0.0058403	0.320035	1466300000
P40124;Q9CYT6	Cap1	Adenylyl cyclase-associated protein 1	2.28559	0.0176212	0.319803	37828000000
Q9DCN2-2;Q9DCN2	Cyb5r3	NADH-cytochrome b5 reductase 3;NADH-cytochrome b5 reductase 3 membrane-bound form;NADH-cytochrome b5 reductase 3 soluble form	0.525184	0.414533	0.0725658	2000900000
P58281-2;P58281	Opa1	Dynamin-like 120 kDa protein, mitochondrial;Dynamin-like 120 kDa protein, form S1	2.65993	0.00891162	0.319592	674760000
Q9CRD0;Q9CRD0-2;Q9CRD0-3	Ociad1	OCIA domain-containing protein 1	2.53097	0.0112521	0.318073	423420000
Q9DCZ1	Gmpr	GMP reductase 1	1.04985	0.160682	0.178269	1990600000
Q9Z1P6	Ndufa7	NADH dehydrogenase [ubiquinone] 1 alpha subcomplex subunit 7	2.64364	0.00914708	0.317379	333310000
P62869	Tceb2	Transcription elongation factor B polypeptide 2	0.432265	0.48787	0.087033	1980700000
Q61768;P28738;P33175	Kif5b	Kinesin-1 heavy chain	6.12943	1.88e-05	0.316083	2377900000
Q6ZWV7	Rpl35	60S ribosomal protein L35	1.21741	0.119706	-0.396488	1978100000
O08795-2;O08795	Prkcsh	Glucosidase 2 subunit beta	1.05665	0.158896	0.10108	1975800000
Q8CDN6	Txnl1	Thioredoxin-like protein 1	0.387077	0.527932	0.0481821	1974900000
P62858	Rps28	40S ribosomal protein S28	1.45087	0.0782527	0.150239	1971700000
P99026	Psmb4	Proteasome subunit beta type-4	0.863148	0.227349	-0.194867	1968500000
Q9D0K2	Oxct1	Succinyl-CoA:3-ketoacid coenzyme A transferase 1, mitochondrial	5.50412	5.29e-05	0.315912	5517800000
Q9DCT2	Ndufs3	NADH dehydrogenase [ubiquinone] iron-sulfur protein 3, mitochondrial	2.69432	0.00835863	0.315557	253550000
Q9QZD9	Eif3i	Eukaryotic translation initiation factor 3 subunit I	3.36505	0.00237411	0.315271	1604700000
O88342	Wdr1	WD repeat-containing protein 1	6.06242	2.06e-05	0.314923	18753000000
Q61335	Bcap31	B-cell receptor-associated protein 31	0.191243	0.736929	-0.0514921	1955400000
O09131;Q8K2Q2	Gsto1	Glutathione S-transferase omega-1	0.860951	0.228181	0.146281	1948600000
Q91VR2	Atp5c1	ATP synthase subunit gamma, mitochondrial	0.980098	0.182848	0.122654	1946500000
Q99N69	Lpxn	Leupaxin	3.93536	0.000862863	0.3142	1767800000
Q924M7	Mpi	Mannose-6-phosphate isomerase	3.20037	0.00326507	0.314162	1003900000
O35887	Calu	Calumenin	0.141693	0.802378	0.0295982	1922400000
Q8BP47	Nars	Asparagine--tRNA ligase, cytoplasmic	5.53132	5.09e-05	0.31394	1576700000
P83882	Rpl36a	60S ribosomal protein L36a	0.114206	0.83803	-0.0471398	1917500000
Q9JLQ0	Cd2ap	CD2-associated protein	2.69752	0.00831676	0.313771	1162200000
P05213;Q3UX10	Tuba1b	Tubulin alpha-1B chain	4.83083	0.00017771	0.312832	53165000000
O89053	Coro1a	Coronin-1A	2.84192	0.00636035	0.312542	53245000000
Q02819	Nucb1	Nucleobindin-1	3.3744	0.0023435	0.312455	5235300000
Q8R480	Nup85	Nuclear pore complex protein Nup85	0.0327789	0.948182	-0.0107266	1902200000
Q9DB20	Atp5o	ATP synthase subunit O, mitochondrial	1.06138	0.157916	0.165137	1878900000
Q8R5A3	Apbb1ip	Amyloid beta A4 precursor protein-binding family B member 1-interacting protein	5.26711	8.22e-05	0.312443	2297800000
Q6P9Q4	Fhod1	FH1/FH2 domain-containing protein 1	2.32323	0.0164147	0.312409	233770000
P48962;Q3V132	Slc25a4	ADP/ATP translocase 1	3.09583	0.00401228	0.312109	1051700000
P61982	Ywhag	14-3-3 protein gamma;14-3-3 protein gamma, N-terminally processed	2.61514	0.0096171	0.311588	6885000000
P58389	Ppp2r4	Serine/threonine-protein phosphatase 2A activator	1.28638	0.105358	0.172691	1866400000
P67778	Phb	Prohibitin	4.99696	0.00013403	0.311571	2168700000
Q8BMJ2	Lars	Leucine--tRNA ligase, cytoplasmic	2.74142	0.00771668	0.30941	478330000
Q07076	Anxa7	Annexin A7	0.659189	0.327293	-0.106338	1859500000
P26039;Q71LX4	Tln1	Talin-1	9.15021	5.94e-08	0.309391	24552000000
P35293	Rab18	Ras-related protein Rab-18	2.40613	0.014127	0.309342	423680000
O70493	Snx12	Sorting nexin-12	0.484227	0.447077	0.0487154	1846700000
P56480	Atp5b	ATP synthase subunit beta, mitochondrial	4.67902	0.000229368	0.308859	18583000000
Q9D1R9	Rpl34	60S ribosomal protein L34	1.27367	0.107692	-0.272139	1843200000
Q99KQ4	Nampt	Nicotinamide phosphoribosyltransferase	1.28463	0.105647	-0.139269	1838700000
Q99JY9;Q641P0;Q641P0-2	Actr3	Actin-related protein 3	5.46264	5.76e-05	0.308178	7496000000
O88544	Cops4	COP9 signalosome complex subunit 4	0.70542	0.302175	0.0681651	1833800000
Q91V76		Ester hydrolase C11orf54 homolog	3.25339	0.0029549	0.306836	2287000000
Q08642	Padi2	Protein-arginine deiminase type-2	1.62012	0.0584542	0.136345	1828800000
P63325	Rps10	40S ribosomal protein S10	3.47909	0.00195385	0.305938	2590100000
Q91XD6	Vps36	Vacuolar protein-sorting-associated protein 36	0.584062	0.375893	0.112748	1824200000
Q921I1;Q9DBD0	Tf	Serotransferrin	1.38667	0.0878044	0.205081	1814500000
Q8C052	Map1s	Microtubule-associated protein 1S;MAP1S heavy chain;MAP1S light chain	2.66017	0.00891162	0.305097	731470000
Q7TN29;Q7TN29-2	Smap2	Stromal membrane-associated protein 2	3.58929	0.00158764	0.305002	1503500000
Q922B1	Macrod1	O-acetyl-ADP-ribose deacetylase MACROD1	1.81125	0.0415164	0.303103	52560000
Q3UNZ8;Q3UNZ8-2		Quinone oxidoreductase-like protein 2	2.53902	0.0110693	0.302449	222770000
Q62448;Q62448-2	Eif4g2	Eukaryotic translation initiation factor 4 gamma 2	2.52981	0.0112614	0.302171	776720000
Q9CXI5	Manf	Mesencephalic astrocyte-derived neurotrophic factor	1.22778	0.117472	0.146429	1809600000
Q61598;Q61598-2	Gdi2	Rab GDP dissociation inhibitor beta	5.78355	3.24e-05	0.301173	22222000000
P62627	Dynlrb1	Dynein light chain roadblock-type 1	1.84201	0.0392154	0.301005	481160000
P68372;CON__ENSEMBL:ENSBTAP00000025008;A2AQ07	Tubb4b	Tubulin beta-4B chain	4.31064	0.000437792	0.300297	63173000000
Q78ZA7	Nap1l4	Nucleosome assembly protein 1-like 4	4.50027	0.000317564	0.300155	1551700000
Q9WVQ5	Apip	Methylthioribulose-1-phosphate dehydratase	1.14873	0.135438	-0.190125	1785500000
P28271	Aco1	Cytoplasmic aconitate hydratase	0.411134	0.506212	0.0619717	1784000000
P62821	Rab1A	Ras-related protein Rab-1A	5.00349	0.00013354	0.299613	4005900000
Q99LC5	Etfa	Electron transfer flavoprotein subunit alpha, mitochondrial	5.75089	3.38e-05	0.29862	2659000000
P62245	Rps15a	40S ribosomal protein S15a	2.02726	0.0280479	0.297772	927590000
P62322	Lsm5	U6 snRNA-associated Sm-like protein LSm5	0.0854964	0.8802	-0.0414222	1772900000
P62830	Rpl23	60S ribosomal protein L23	0.797226	0.255959	0.117445	1768300000
P32233	Drg1	Developmentally-regulated GTP-binding protein 1	1.74655	0.0467259	0.295911	205570000
Q3TDD9;Q3TDD9-2	Ppp1r21	Protein phosphatase 1 regulatory subunit 21	6.11387	1.9e-05	0.294994	804710000
Q9DAU1;Q9DAU1-2	Cnpy3	Protein canopy homolog 3	2.55142	0.0108165	0.294893	1014800000
O35295	Purb	Transcriptional activator protein Pur-beta	0.57464	0.382261	0.104747	1760100000
Q80UJ7	Rab3gap1	Rab3 GTPase-activating protein catalytic subunit	1.84887	0.0387509	0.294712	190020000
Q9DB29	Iah1	Isoamyl acetate-hydrolyzing esterase 1 homolog	1.85145	0.0385518	0.294673	286880000
Q9QXZ0;Q9QXZ0-2;Q9QXZ0-3;Q9QXZ0-4	Macf1	Microtubule-actin cross-linking factor 1	6.77037	6.05e-06	0.294057	3183000000
P61924	Copz1	Coatomer subunit zeta-1	3.59215	0.00158764	0.294032	609030000
P27661	H2afx	Histone H2AX	0.781948	0.26284	-0.379941	1743200000
P26638	Sars	Serine--tRNA ligase, cytoplasmic	4.382	0.000388211	0.293335	1002500000
Q8BWT1	Acaa2	3-ketoacyl-CoA thiolase, mitochondrial	3.63804	0.00147303	0.293005	976100000
O09167	Rpl21	60S ribosomal protein L21	0.079438	0.887441	-0.0226622	1730200000
Q8BFZ9	Erlin2	Erlin-2	0.564561	0.388235	-0.0538862	1728100000
O70492	Snx3	Sorting nexin-3	1.19023	0.125747	0.174343	1725400000
Q9D2V7	Coro7	Coronin-7	1.15404	0.134154	0.113527	1719300000
Q9Z1Q9	Vars	Valine--tRNA ligase	5.06778	0.000119736	0.292848	4177600000
Q9DBG6	Rpn2	Dolichyl-diphosphooligosaccharide--protein glycosyltransferase subunit 2	3.50971	0.00183924	0.292209	2695100000
P31786	Dbi	Acyl-CoA-binding protein	1.54901	0.0658939	-0.20996	1713800000
Q9CZ13	Uqcrc1	Cytochrome b-c1 complex subunit 1, mitochondrial	4.42969	0.000354414	0.291929	3260000000
Q9QY76	Vapb	Vesicle-associated membrane protein-associated protein B	0.0455873	0.929881	0.0093698	1712400000
P27546-2;P27546;P27546-3;P27546-4	Map4	Microtubule-associated protein 4	2.58032	0.0102431	0.29172	11407000000
Q80TY0-2;Q80TY0-3;Q80TY0;Q80TY0-4;Q80TY0-5	Fnbp1	Formin-binding protein 1	2.12405	0.0237304	0.29123	496010000
P61021	Rab5b	Ras-related protein Rab-5B	2.07358	0.025912	0.291176	567840000
Q9WV55	Vapa	Vesicle-associated membrane protein-associated protein A	2.72131	0.0079799	0.290806	2980700000
Q6ZQM8;Q62452;Q64435;P70691;Q63886	Ugt1a7c	UDP-glucuronosyltransferase 1-7C	0.78829	0.259616	0.136628	1669000000
Q9CPW4	Arpc5	Actin-related protein 2/3 complex subunit 5	2.30508	0.0170118	0.290553	1845500000
Q6A028	Swap70	Switch-associated protein 70	0.854877	0.231058	0.176857	1666500000
P57776;P57776-3	Eef1d	Elongation factor 1-delta	3.41787	0.00218755	0.290185	4964700000
Q8CBW3-5;Q8CBW3-2;Q8CBW3-4;Q8CBW3-3;Q8CBW3	Abi1	Abl interactor 1	2.46029	0.012797	0.289934	496630000
O70251	Eef1b	Elongation factor 1-beta	2.0951	0.0249858	0.289651	1685700000
Q7TMB8;Q7TMB8-2	Cyfip1	Cytoplasmic FMR1-interacting protein 1	4.6396	0.000246564	0.288914	6231600000
Q9DBE0	Csad	Cysteine sulfinic acid decarboxylase	3.72983	0.00124434	0.288857	705580000
Q7TQI3	Otub1	Ubiquitin thioesterase OTUB1	0.645275	0.336655	0.0854103	1645300000
Q8BH04;Q9Z2V4	Pck2	Phosphoenolpyruvate carboxykinase [GTP], mitochondrial	3.42995	0.00213794	0.288345	757330000
O35343	Kpna4	Importin subunit alpha-3	0.395845	0.52042	0.111056	1642800000
P62911	Rpl32	60S ribosomal protein L32	0.693172	0.309292	-0.289525	1639700000
P70460	Vasp	Vasodilator-stimulated phosphoprotein	1.46295	0.0768289	0.195179	1639100000
Q9EQ06;Q9EQ06-2;Q8VCR2-2;Q8VCR2	Hsd17b11	Estradiol 17-beta-dehydrogenase 11	1.1236	0.14144	0.130474	1624600000
O88487;O88485-2;O88485	Dync1i2	Cytoplasmic dynein 1 intermediate chain 2	2.32707	0.0163152	0.287882	958500000
Q60865	Caprin1	Caprin-1	3.37096	0.00234934	0.287627	1955900000
P10852;P10852-2	Slc3a2	4F2 cell-surface antigen heavy chain	0.70121	0.304588	-0.0594428	1607200000
Q64433	Hspe1	10 kDa heat shock protein, mitochondrial	2.92615	0.00545762	0.286749	4218000000
P51174	Acadl	Long-chain specific acyl-CoA dehydrogenase, mitochondrial	1.4966	0.0723833	0.191774	1601800000
Q922Q1	2020-03-02	Mitochondrial amidoxime reducing component 2	3.77501	0.00114748	0.286711	1217500000
Q8VEM8	Slc25a3	Phosphate carrier protein, mitochondrial	0.308189	0.605468	0.0621955	1583800000
Q9JMG1	Edf1	Endothelial differentiation-related factor 1	0.28523	0.632597	-0.0725914	1582800000
Q9QUR6	Prep	Prolyl endopeptidase	1.32812	0.0979806	0.207993	1581000000
P25444	Rps2	40S ribosomal protein S2	4.39119	0.000381091	0.285476	5597700000
O08547	Sec22b	Vesicle-trafficking protein SEC22b	0.244334	0.677029	-0.0388806	1576600000
Q8VDD5;P13542;Q02566;P13541	Myh9	Myosin-9	5.09831	0.00011433	0.285265	52213000000
Q9JK81	Myg1	UPF0160 protein MYG1, mitochondrial	0.682249	0.314693	-0.0782754	1574600000
P62301	Rps13	40S ribosomal protein S13	1.6167	0.0587144	-0.214615	1571300000
P98086	C1qa	Complement C1q subcomponent subunit A	0.485494	0.446465	0.0619796	1570600000
Q9DBF1-2;Q9DBF1	Aldh7a1	Alpha-aminoadipic semialdehyde dehydrogenase	2.6475	0.00911764	0.284985	263590000
Q8BRT1;Q8BRT1-6;Q80TV8-2;Q80TV8	Clasp2	CLIP-associating protein 2	3.19133	0.00331909	0.284758	1041200000
Q9D7X3	Dusp3	Dual specificity protein phosphatase 3	1.28373	0.105773	0.127748	1563200000
Q8BGD9	Eif4b	Eukaryotic translation initiation factor 4B	0.408467	0.508123	0.0923129	1561100000
Q3UZ39;Q3UZ39-3;Q3UZ39-2;Q91WK0-2;Q91WK0	Lrrfip1	Leucine-rich repeat flightless-interacting protein 1	1.76955	0.0447786	0.284723	573990000
Q99JI4	Psmd6	26S proteasome non-ATPase regulatory subunit 6	0.0816942	0.885626	-0.0154968	1560000000
Q91WV0	Dr1	Protein Dr1	1.02551	0.168225	-0.106718	1559000000
D3Z6Q9;Q7TQF7	Bin2	Bridging integrator 2	3.45151	0.00205452	0.284218	12231000000
Q8BJW6;Q8BJW6-2	Eif2a	Eukaryotic translation initiation factor 2A;Eukaryotic translation initiation factor 2A, N-terminally processed	3.45659	0.00203997	0.28407	544010000
P62843	Rps15	40S ribosomal protein S15	0.496976	0.436675	-0.0868156	1551600000
P47791	Gsr	Glutathione reductase, mitochondrial	0.952369	0.192957	-0.173833	1547000000
Q9CZD3	Gars	Glycine--tRNA ligase	2.86268	0.00616395	0.284	399920000
P35979	Rpl12	60S ribosomal protein L12	2.61098	0.00968419	0.283312	4453000000
Q8QZY1	Eif3l	Eukaryotic translation initiation factor 3 subunit L	1.99526	0.0297887	0.283202	597040000
Q9WVE8	Pacsin2	Protein kinase C and casein kinase substrate in neurons protein 2	4.3669	0.000399825	0.282545	2593900000
Q91YR1	Twf1	Twinfilin-1	3.70728	0.00129593	0.28237	756030000
P70195	Psmb7	Proteasome subunit beta type-7	0.984165	0.181564	-0.11694	1527700000
Q01730	Rsu1	Ras suppressor protein 1	1.17673	0.12936	0.187152	1512400000
Q9R020;Q9R020-2	Zranb2	Zinc finger Ran-binding domain-containing protein 2	0.526102	0.414147	-0.078806	1512400000
Q61035	Hars	Histidine--tRNA ligase, cytoplasmic	2.8238	0.00659011	0.281764	474480000
P19157;P46425	Gstp1	Glutathione S-transferase P 1	4.79748	0.0001876	0.281706	6330600000
O89079	Cope	Coatomer subunit epsilon	1.80574	0.0418842	0.281581	817410000
Q922B2	Dars	Aspartate--tRNA ligase, cytoplasmic	0.305578	0.608058	0.048303	1495600000
Q80X50;Q80X50-5;Q80X50-3;Q80X50-4;Q80X50-2	Ubap2l	Ubiquitin-associated protein 2-like	2.80579	0.00680135	0.281502	1270200000
P01864;P01863;P01865		Ig gamma-2A chain C region secreted form	1.11859	0.142626	-0.249099	1484400000
P41241	Csk	Tyrosine-protein kinase CSK	0.723577	0.292216	0.112751	1483700000
Q9CQW1	Ykt6	Synaptobrevin homolog YKT6	1.5959	0.0605109	0.148499	1482900000
P83741-4;P83741;P83741-2;P83741-3;P83741-5;P83741-6;Q3UH66-6;Q3UH66-2;Q3UH66-7;Q3UH66-4;Q3UH66-3;Q3UH66;Q3UH66-5	Wnk1	Serine/threonine-protein kinase WNK1	3.29718	0.00272047	0.280205	1047300000
Q61553	Fscn1	Fascin	5.91172	2.64e-05	0.279865	37247000000
Q62241	Snrpc	U1 small nuclear ribonucleoprotein C	0.256112	0.663665	-0.0787899	1475600000
Q00612;P97324	G6pdx	Glucose-6-phosphate 1-dehydrogenase X	2.83219	0.00648005	0.279823	2434400000
Q9CQR6	Ppp6c	Serine/threonine-protein phosphatase 6 catalytic subunit;Serine/threonine-protein phosphatase 6 catalytic subunit, N-terminally processed	2.86348	0.00616041	0.277767	476330000
P47811;P47811-3;P47811-4;P47811-2	Mapk14	Mitogen-activated protein kinase 14	1.10244	0.14709	-0.0956994	1474300000
Q9JHU9	Isyna1	Inositol-3-phosphate synthase 1	1.92253	0.033998	0.277359	625370000
E9PVA8	Gcn1l1		4.0774	0.000672716	0.275925	684130000
P19536	Cox5b	Cytochrome c oxidase subunit 5B, mitochondrial	1.5818	0.0620453	0.258738	1472700000
Q99PT1	Arhgdia	Rho GDP-dissociation inhibitor 1	4.86747	0.000167915	0.275589	29483000000
P35282	Rab21	Ras-related protein Rab-21	2.04436	0.027288	0.275264	296910000
Q61205	Pafah1b3	Platelet-activating factor acetylhydrolase IB subunit gamma	3.53398	0.0017661	0.275116	889660000
Q8R1B4	Eif3c	Eukaryotic translation initiation factor 3 subunit C	4.52108	0.000306193	0.274558	1450900000
Q9CQI3	Gmfb	Glia maturation factor beta	3.99183	0.000784704	0.274141	3682600000
Q91WC9	Daglb	Sn1-specific diacylglycerol lipase beta	2.23332	0.0193343	0.274023	411910000
Q3UND0;Q3UND0-2	Skap2	Src kinase-associated phosphoprotein 2	2.21409	0.0200779	0.273982	333750000
Q91ZR2	Snx18	Sorting nexin-18	4.25038	0.000490504	0.27382	946680000
P29595	Nedd8	NEDD8	0.180265	0.751724	0.0580354	1435500000
P61161	Actr2	Actin-related protein 2	4.69634	0.00022324	0.273461	5061800000
Q9CZU6	Cs	Citrate synthase, mitochondrial	3.24596	0.00300138	0.272651	2433900000
Q3THE2;Q9CQ19	Myl12b	Myosin regulatory light chain 12B	2.07046	0.0260143	0.271874	2046200000
Q9CQJ6	Denr	Density-regulated protein	2.73156	0.00781007	0.271786	758550000
Q8K4Z3	Apoa1bp	NAD(P)H-hydrate epimerase	2.99978	0.00478155	0.271604	1791400000
Q505F5	Lrrc47	Leucine-rich repeat-containing protein 47	3.80458	0.00109098	0.271111	469550000
P45952	Acadm	Medium-chain specific acyl-CoA dehydrogenase, mitochondrial	3.40659	0.00222675	0.271052	2095500000
P54728	Rad23b	UV excision repair protein RAD23 homolog B	0.0159262	0.974492	0.00412472	1409000000
Q9D964	Gatm	Glycine amidinotransferase, mitochondrial	0.491045	0.44182	0.0658886	1405400000
Q91X52	Dcxr	L-xylulose reductase	1.27911	0.106535	0.176835	1403100000
P26516	Psmd7	26S proteasome non-ATPase regulatory subunit 7	0.227381	0.695747	-0.0343561	1400800000
Q9WV80	Snx1	Sorting nexin-1	3.69633	0.0013167	0.270548	908120000
P83940	Tceb1	Transcription elongation factor B polypeptide 1	0.170914	0.763405	-0.0337977	1398100000
P48024	Eif1	Eukaryotic translation initiation factor 1	1.15718	0.133696	-0.170681	1397100000
Q8VDQ8-2;Q8VDQ8;Q8VDQ8-4;Q8VDQ8-3	Sirt2	NAD-dependent protein deacetylase sirtuin-2	2.56474	0.0105589	0.269983	813200000
P30355	Alox5ap	Arachidonate 5-lipoxygenase-activating protein	0.799785	0.255141	-0.19487	1392200000
P20491	Fcer1g	High affinity immunoglobulin epsilon receptor subunit gamma	0.843443	0.235905	-0.173097	1387100000
Q6A0A9	FAM120A	Constitutive coactivator of PPAR-gamma-like protein 1	4.02241	0.000749355	0.269823	983030000
Q9CZW5	Tomm70a	Mitochondrial import receptor subunit TOM70	1.96324	0.0315154	0.269546	550310000
Q9CQQ8	Lsm7	U6 snRNA-associated Sm-like protein LSm7	0.0333205	0.947641	-0.0181113	1373500000
Q8JZQ9	Eif3b	Eukaryotic translation initiation factor 3 subunit B	1.06182	0.157847	0.147815	1366400000
Q9JK48;Q9JK48-2;Q9JK48-3	Sh3glb1	Endophilin-B1	2.85651	0.00622039	0.26953	1479200000
P47740;P47739	Aldh3a2	Fatty aldehyde dehydrogenase	4.20962	0.000525337	0.268664	1504200000
Q61510	Trim25	E3 ubiquitin/ISG15 ligase TRIM25	1.79094	0.0431099	0.26829	418810000
Q05144	Rac2	Ras-related C3 botulinum toxin substrate 2	0.0489786	0.925358	0.0106124	1357300000
Q9EQP2;Q9QXY6;Q9WVK4;Q8BH64	Ehd4	EH domain-containing protein 4	0.810706	0.249873	0.0986107	1356200000
Q99LB6;Q99LB6-2	Mat2b	Methionine adenosyltransferase 2 subunit beta	0.358896	0.555619	-0.0499221	1354600000
P99024	Tubb5	Tubulin beta-5 chain	4.44547	0.000343626	0.268143	18983000000
Q8BGC0;Q8BGC0-2	Htatsf1	HIV Tat-specific factor 1 homolog	1.02001	0.169913	-0.102782	1352800000
Q9JMH9-5;Q9JMH9-7;Q9JMH9-2;Q9JMH9-1;Q9JMH9;Q9JMH9-6;Q9JMH9-4	Myo18a	Unconventional myosin-XVIIIa	4.95364	0.000143224	0.268106	1244500000
O55098	Stk10	Serine/threonine-protein kinase 10	0.727489	0.290487	0.0872113	1350500000
P51410	Rpl9	60S ribosomal protein L9	1.34073	0.0955736	0.119711	1349500000
P39447	Tjp1	Tight junction protein ZO-1	1.6383	0.0565265	0.15261	1348700000
Q9Z1Z2	Strap	Serine-threonine kinase receptor-associated protein	3.48766	0.00192207	0.265986	1304500000
Q9CWK8	Snx2	Sorting nexin-2	2.59676	0.00991755	0.264724	2739800000
P25911;P16277	Lyn	Tyrosine-protein kinase Lyn	0.667795	0.322784	0.0665634	1337700000
P48428	Tbca	Tubulin-specific chaperone A	0.677153	0.317526	0.117629	1331900000
Q8CGC7	Eprs	Bifunctional glutamate/proline--tRNA ligase;Glutamate--tRNA ligase;Proline--tRNA ligase	5.98095	2.29e-05	0.264637	2463800000
Q99MK8	Adrbk1	Beta-adrenergic receptor kinase 1	2.3942	0.0144364	0.26434	250530000
P01887	B2m	Beta-2-microglobulin	0.0423103	0.934943	0.0153457	1322100000
Q91W89	Man2c1	Alpha-mannosidase 2C1	3.03275	0.00451144	0.264163	514430000
P63330	Ppp2ca	Serine/threonine-protein phosphatase 2A catalytic subunit alpha isoform	1.47031	0.0758261	0.229918	1318800000
Q9CQ65	Mtap	S-methyl-5-thioadenosine phosphorylase	0.817989	0.247261	0.136672	1317300000
Q61655;Q9QY15-2;Q9QY15	Ddx19a	ATP-dependent RNA helicase DDX19A	0.727087	0.290607	0.0810264	1313900000
Q9D2G2;Q9D2G2-2	Dlst	Dihydrolipoyllysine-residue succinyltransferase component of 2-oxoglutarate dehydrogenase complex, mitochondrial	3.06572	0.00422827	0.263217	679770000
Q8QZT1	Acat1	Acetyl-CoA acetyltransferase, mitochondrial	4.97953	0.000138471	0.262718	4037100000
P59325	Eif5	Eukaryotic translation initiation factor 5	3.81455	0.00107512	0.262051	737430000
Q3UYC0;Q3UYC0-2	Ppm1h	Protein phosphatase 1H	2.82262	0.00659533	0.261786	457250000
Q9DCW4	Etfb	Electron transfer flavoprotein subunit beta	3.6287	0.00149691	0.261591	1475500000
Q9CQM5	Txndc17	Thioredoxin domain-containing protein 17	0.137374	0.807851	0.0232674	1308300000
P55194	Sh3bp1	SH3 domain-binding protein 1	3.94479	0.000853965	0.261219	634980000
Q9DCJ5	Ndufa8	NADH dehydrogenase [ubiquinone] 1 alpha subcomplex subunit 8	1.43966	0.0798494	0.288789	1304800000
Q8VCR7	Abhd14b	Alpha/beta hydrolase domain-containing protein 14B	2.06694	0.0261976	0.261008	565110000
P31230	Aimp1	Aminoacyl tRNA synthase complex-interacting multifunctional protein 1;Endothelial monocyte-activating polypeptide 2	2.17046	0.0216744	0.260491	591750000
Q3UMY5;Q3UMY5-3;Q3UMY5-2;Q3UMY5-4	Eml4	Echinoderm microtubule-associated protein-like 4	2.35085	0.015568	0.260428	692970000
Q99MJ9	Ddx50	ATP-dependent RNA helicase DDX50	0.553651	0.395558	-0.758912	1301800000
P09671	Sod2	Superoxide dismutase [Mn], mitochondrial	1.10198	0.147092	0.152153	1297700000
P42125	Eci1	Enoyl-CoA delta isomerase 1, mitochondrial	2.07955	0.0257151	0.260166	552220000
Q9WVJ5	Crybb1	Beta-crystallin B1;Beta-crystallin B1B	3.26307	0.00289843	0.259976	19429000000
Q9JL26;Q9JL26-2	Fmnl1	Formin-like protein 1	1.06957	0.15555	0.0725444	1283600000
Q61753	Phgdh	D-3-phosphoglycerate dehydrogenase	3.82716	0.00105869	0.259684	8615000000
Q9DCL9	Paics	Multifunctional protein ADE2;Phosphoribosylaminoimidazole-succinocarboxamide synthase;Phosphoribosylaminoimidazole carboxylase	2.62214	0.00948102	0.259473	834640000
Q80YW0	Cyth4	Cytohesin-4	2.87642	0.00602564	0.258413	600030000
O55131;Q9DA97	2020-09-07	Septin-7	1.60769	0.0593206	0.156876	1278800000
Q9R0P5	Dstn	Destrin	1.98253	0.0304963	0.256534	5705400000
Q9JMA1	Usp14	Ubiquitin carboxyl-terminal hydrolase 14	0.821852	0.245525	-0.110928	1272000000
Q60631;Q60631-2	Grb2	Growth factor receptor-bound protein 2	0.834882	0.239262	-0.125881	1270300000
Q8BMF4	Dlat	Dihydrolipoyllysine-residue acetyltransferase component of pyruvate dehydrogenase complex, mitochondrial	1.98076	0.0305953	0.256497	636140000
Q61699-2;Q61699	Hsph1	Heat shock protein 105 kDa	0.643717	0.337165	0.0780773	1269600000
Q8R050-2;Q8R050;Q149F3	Gspt1	Eukaryotic peptide chain release factor GTP-binding subunit ERF3A	3.60522	0.00155204	0.256453	2312700000
Q02257	Jup	Junction plakoglobin	0.121491	0.829068	0.193571	1262400000
Q9CY64	Blvra	Biliverdin reductase A	0.0178046	0.972586	0.00266155	1257900000
Q9CYG7;Q9CYG7-2	Tomm34	Mitochondrial import receptor subunit TOM34	1.2845	0.105647	0.145231	1257500000
Q78PY7	Snd1	Staphylococcal nuclease domain-containing protein 1	7.79179	9.82e-07	0.256084	11043000000
P61327;Q9CQL1	Magoh;Magohb	Protein mago nashi homolog;Protein mago nashi homolog 2	0.155823	0.784409	0.03802	1257200000
P58252	Eef2	Elongation factor 2	4.7296	0.000211885	0.255923	12559000000
Q3UGR5;Q3UGR5-2	Hdhd2	Haloacid dehalogenase-like hydrolase domain-containing protein 2	1.63678	0.0566061	0.216822	1253400000
P97494	Gclc	Glutamate--cysteine ligase catalytic subunit	2.84853	0.00630384	0.255865	436280000
Q61081	Cdc37	Hsp90 co-chaperone Cdc37;Hsp90 co-chaperone Cdc37, N-terminally processed	0.397975	0.518444	0.0649156	1246100000
Q8CI51;Q8CI51-2;Q8CI51-3	Pdlim5	PDZ and LIM domain protein 5	1.95664	0.031867	0.255517	349470000
P21981	Tgm2	Protein-glutamine gamma-glutamyltransferase 2	4.56319	0.000283621	0.255325	3712300000
O08528	Hk2	Hexokinase-2	5.42671	6.12e-05	0.254771	4345700000
Q9CYA6	Zcchc8	Zinc finger CCHC domain-containing protein 8	1.18569	0.126928	-0.151184	1237100000
Q62186	Ssr4	Translocon-associated protein subunit delta	0.832021	0.240509	0.150476	1234500000
Q62393-2;Q62393-3;Q62393	Tpd52	Tumor protein D52	2.07054	0.0260143	0.254479	2111900000
Q9DCT6;Q9DCT6-2	Bap18	Chromatin complexes subunit BAP18	0.855881	0.230643	-0.160104	1231700000
Q6ZWU9	Rps27	40S ribosomal protein S27	1.9913	0.0299861	0.253646	666990000
Q60737	Csnk2a1	Casein kinase II subunit alpha	1.61289	0.0590273	0.131313	1225800000
P70122	Sbds	Ribosome maturation protein SBDS	0.798324	0.255767	-0.146524	1223200000
Q6P1B1	Xpnpep1	Xaa-Pro aminopeptidase 1	2.20172	0.0205052	0.2531	467910000
Q68FH4	Galk2	N-acetylgalactosamine kinase	0.131366	0.815262	-0.0137993	1221000000
Q9D1A2	Cndp2	Cytosolic non-specific dipeptidase	4.6448	0.000244378	0.252797	24612000000
Q9EPU0-2;Q9EPU0	Upf1	Regulator of nonsense transcripts 1	3.02105	0.00460296	0.252689	1319400000
Q3UHX2	Pdap1	28 kDa heat- and acid-stable phosphoprotein	0.814112	0.248676	0.14933	1218100000
Q9CPV4;Q9CPV4-2;Q9CPV4-3	Glod4	Glyoxalase domain-containing protein 4	6.26028	1.53e-05	0.252135	3538500000
Q9DBB8	Dhdh	Trans-1,2-dihydrobenzene-1,2-diol dehydrogenase	0.454497	0.47039	0.0730401	1212800000
P13439	Umps	Uridine 5-monophosphate synthase;Orotate phosphoribosyltransferase;Orotidine 5-phosphate decarboxylase	0.449375	0.474529	-0.0534532	1211200000
Q9ES74	Nek7	Serine/threonine-protein kinase Nek7	0.412727	0.505019	-0.0735683	1209800000
Q9D8Y7	Tnfaip8l2	Tumor necrosis factor alpha-induced protein 8-like protein 2	0.0525637	0.921829	0.0198491	1208200000
Q9DBC7	Prkar1a	cAMP-dependent protein kinase type I-alpha regulatory subunit;cAMP-dependent protein kinase type I-alpha regulatory subunit, N-terminally processed	2.49293	0.0120727	0.252032	1358700000
Q9D1K2	Atp6v1f	V-type proton ATPase subunit F	2.07051	0.0260143	0.251917	402730000
P70670;Q60817	Naca	Nascent polypeptide-associated complex subunit alpha, muscle-specific form;Nascent polypeptide-associated complex subunit alpha	1.69962	0.0507085	0.23369	1205700000
P51855	Gss	Glutathione synthetase	2.11806	0.0238885	0.251625	186770000
P29758	Oat	Ornithine aminotransferase, mitochondrial	1.8653	0.0377225	0.251259	514430000
Q8VDQ1;Q8VDQ1-2	Ptgr2	Prostaglandin reductase 2	1.00714	0.173734	0.151211	1203700000
Q99KF1	Tmed9	Transmembrane emp24 domain-containing protein 9	0.964389	0.188405	0.138605	1201900000
P09055;P09055-2	Itgb1	Integrin beta-1	1.67077	0.0534603	-0.137913	1193300000
Q60692	Psmb6	Proteasome subunit beta type-6	0.951202	0.193357	-0.143867	1187200000
Q8BFR5;Q8BFR5-2	Tufm	Elongation factor Tu, mitochondrial	3.04264	0.00443433	0.251175	2832700000
Q8VDN2	Atp1a1	Sodium/potassium-transporting ATPase subunit alpha-1	0.359439	0.555125	-0.0448842	1183800000
O89051	Itm2b	Integral membrane protein 2B;BRI2, membrane form;BRI2 intracellular domain;BRI2C, soluble form;Bri23 peptide	2.50404	0.011831	0.250781	461990000
Q8R016	Blmh	Bleomycin hydrolase	0.652234	0.332014	0.101174	1171600000
P97393	Arhgap5	Rho GTPase-activating protein 5	2.76156	0.00740269	0.250757	346670000
P35821	Ptpn1	Tyrosine-protein phosphatase non-receptor type 1	0.806392	0.251701	0.0759081	1164800000
Q9DB27;Q9DB27-2;Q9CQ21	Mcts1	Malignant T-cell-amplified sequence 1	1.94719	0.0324086	0.249527	563140000
Q7TSC1	Prrc2a	Protein PRRC2A	1.72569	0.0485231	0.24951	461770000
Q3UGC7;Q66JS6	Eif3j1;Eif3j2	Eukaryotic translation initiation factor 3 subunit J-A;Eukaryotic translation initiation factor 3 subunit J-B	2.35178	0.0155655	0.249065	1393600000
Q921Y0;Q921Y0-2;Q8BPB0	Mob1a;Mob1b	MOB kinase activator 1A;MOB kinase activator 1B	0.0370977	0.942168	0.0124846	1154200000
P49710	Hcls1	Hematopoietic lineage cell-specific protein	2.15916	0.0221048	0.248908	10281000000
Q922D4-2;Q922D4;Q922D4-3;Q922D4-4	Ppp6r3	Serine/threonine-protein phosphatase 6 regulatory subunit 3	2.32315	0.0164147	0.248064	334810000
Q9D824-3;Q9D824-2;Q9D824;Q9D824-4	Fip1l1	Pre-mRNA 3-end-processing factor FIP1	1.54525	0.0662955	-0.266608	1152500000
Q9D8U8	Snx5	Sorting nexin-5	3.66364	0.00140142	0.246677	2510200000
Q02105	C1qc	Complement C1q subcomponent subunit C	0.535932	0.408096	0.107967	1150000000
Q9CQ92	Fis1	Mitochondrial fission 1 protein	0.950963	0.193369	0.140827	1146700000
P62717	Rpl18a	60S ribosomal protein L18a	0.930609	0.200974	-0.118395	1142800000
Q9ES52-2;Q9ES52;Q9ES52-3;Q9ES52-4;Q9ES52-5;Q9ES52-6	Inpp5d	Phosphatidylinositol 3,4,5-trisphosphate 5-phosphatase 1	4.32406	0.000425553	0.246401	2891800000
P70336;P70336-2	Rock2	Rho-associated protein kinase 2	2.57925	0.0102571	0.245936	895730000
Q9Z2W0	Dnpep	Aspartyl aminopeptidase	0.458674	0.467048	0.0631285	1137100000
P42225	Stat1	Signal transducer and activator of transcription 1	0.0469722	0.928552	-0.00880273	1136300000
O55222	Ilk	Integrin-linked protein kinase	2.34026	0.0158893	0.245821	901090000
Q9CXW4	Rpl11	60S ribosomal protein L11	2.27835	0.0178485	0.245124	2720000000
P46467	Vps4b	Vacuolar protein sorting-associated protein 4B	1.12763	0.140358	0.113111	1131000000
Q01147;Q01147-2	Creb1	Cyclic AMP-responsive element-binding protein 1	0.943443	0.19617	-0.222169	1127500000
Q9D8E6	Rpl4	60S ribosomal protein L4	3.51189	0.00183314	0.244737	10129000000
Q9EQU5-2	Set	Protein SET	1.61143	0.0591432	-0.390471	1124400000
P63038;P63038-2	Hspd1	60 kDa heat shock protein, mitochondrial	4.85683	0.000169697	0.244584	8157200000
P60843	Eif4a1	Eukaryotic initiation factor 4A-I	2.8366	0.00642267	0.244368	3414000000
P57780;Q9JI91;O88990	Actn4	Alpha-actinin-4	0.0203623	0.969032	-0.00324697	1121200000
O35593	Psmd14	26S proteasome non-ATPase regulatory subunit 14	0.0580888	0.914855	-0.0145352	1121000000
P07214	Sparc	SPARC	2.29603	0.017286	0.243647	2485100000
P19253	Rpl13a	60S ribosomal protein L13a	0.984102	0.181564	0.119077	1117100000
Q9Z2M7;O35621	Pmm2	Phosphomannomutase 2	0.225591	0.69772	0.0331249	1117100000
P70403	Cux1	Protein CASP	0.00717164	0.988105	0.0256827	1116900000
A2AB59-2	Arhgap27	Rho GTPase-activating protein 27	3.08327	0.0040984	0.243203	1035800000
Q14DN9-2;Q14DN9	Ankdd1b	Ankyrin repeat and death domain-containing protein 1B	0.156805	0.784085	-0.495532	1114900000
P70318	Tial1	Nucleolysin TIAR	1.14841	0.135465	-0.190717	1114300000
Q9WVJ2	Psmd13	26S proteasome non-ATPase regulatory subunit 13	0.91144	0.208323	-0.153076	1112000000
Q9D1M0	Sec13	Protein SEC13 homolog	3.17478	0.00342799	0.243164	787740000
Q60930	Vdac2	Voltage-dependent anion-selective channel protein 2	2.32955	0.0162702	0.242969	3908200000
P97352	S100a13	Protein S100-A13	0.283768	0.634073	-0.0531705	1106000000
Q8R1X6;Q8R1X6-2	Spg20	Spartin	2.05907	0.0265385	0.242913	405060000
Q8R4R6	Nup35	Nucleoporin NUP53	1.35601	0.0929316	-0.213939	1102300000
P63328-2	Ppp3ca	Serine/threonine-protein phosphatase 2B catalytic subunit alpha isoform	2.63857	0.00920161	0.242789	906270000
Q3UIA2;Q3UIA2-2;Q3UIA2-4;Q3UIA2-3;Q5SSM3-2;Q5SSM3-3;Q5SSM3	Arhgap17	Rho GTPase-activating protein 17	5.07778	0.000118105	0.242688	1102600000
P62849-2;P62849-3;P62849	Rps24	40S ribosomal protein S24	0.0821708	0.885626	0.0193866	1100800000
O55135	Eif6	Eukaryotic translation initiation factor 6	0.0458267	0.929766	0.012609	1098800000
Q9JHS9	Cwc15	Spliceosome-associated protein CWC15 homolog	1.55012	0.0657693	-0.252078	1098300000
P18760	Cfl1	Cofilin-1	2.23821	0.019208	0.241502	78761000000
Q9WUA2	Farsb	Phenylalanine--tRNA ligase beta subunit	2.02743	0.0280479	0.241255	787510000
Q8BGB5	Limd2	LIM domain-containing protein 2	0.424772	0.493589	-0.10588	1091400000
O70194	Eif3d	Eukaryotic translation initiation factor 3 subunit D	1.28619	0.105358	0.219242	1084400000
Q9Z1D1	Eif3g	Eukaryotic translation initiation factor 3 subunit G	1.1112	0.144535	0.199922	1083600000
P61028;REV__G3UYX5	Rab8b	Ras-related protein Rab-8B	1.79354	0.0428852	0.24081	583640000
Q9D735		Uncharacterized protein C19orf43 homolog	1.04232	0.162927	-0.291084	1082100000
Q63810-2;Q63810;Q63811	Ppp3r1	Calcineurin subunit B type 1	2.74208	0.00771434	0.240754	435410000
Q64737;Q64737-2	Gart	Trifunctional purine biosynthetic protein adenosine-3;Phosphoribosylamine--glycine ligase;Phosphoribosylformylglycinamidine cyclo-ligase;Phosphoribosylglycinamide formyltransferase	0.947349	0.194794	0.105968	1078500000
Q8K2B3	Sdha	Succinate dehydrogenase [ubiquinone] flavoprotein subunit, mitochondrial	2.5292	0.0112614	0.240217	4793600000
P52760	Hrsp12	Ribonuclease UK114	1.72728	0.0484052	0.239876	281840000
P08103-2;P08103	Hck	Tyrosine-protein kinase HCK	1.76586	0.0450943	0.239696	429970000
Q7M6Y3-5;Q7M6Y3-2;Q7M6Y3-3	Picalm	Phosphatidylinositol-binding clathrin assembly protein	2.69761	0.00831676	0.239619	3098900000
Q8BJU0-2;Q8BJU0	Sgta	Small glutamine-rich tetratricopeptide repeat-containing protein alpha	1.71391	0.049676	0.239076	500710000
Q68FL6	Mars	Methionine--tRNA ligase, cytoplasmic	2.22171	0.0198022	0.23713	477490000
Q91VD9	Ndufs1	NADH-ubiquinone oxidoreductase 75 kDa subunit, mitochondrial	3.70633	0.00129634	0.237077	1693800000
Q3TBD2;Q3TBD2-2;Q3TBD2-3;Q3TBD2-4	Hmha1	Minor histocompatibility protein HA-1	1.88494	0.0364546	0.236815	3255100000
Q91YJ3	Thyn1	Thymocyte nuclear protein 1	0.809282	0.250307	-0.208618	1062700000
Q9QZE7	Tsnax	Translin-associated protein X	2.242	0.0190949	0.236345	825840000
P34022	Ranbp1	Ran-specific GTPase-activating protein	2.35241	0.0155586	0.235648	975490000
P01899;P01897;P01900;P01896;P01895-2;P01895;P01898;P14430;P14429;P14431;P14427	H2-D1	H-2 class I histocompatibility antigen, D-B alpha chain	1.50233	0.0718505	-0.206582	1057500000
Q03265	Atp5a1	ATP synthase subunit alpha, mitochondrial	5.16501	0.000100925	0.235561	19365000000
P63005;P63005-2	Pafah1b1	Platelet-activating factor acetylhydrolase IB subunit alpha	1.42198	0.0825491	0.28647	1055000000
Q8R550-2;Q8R550-3;Q8R550;Q8R550-5;Q8R550-4;Q8R550-6;Q8R550-8;Q8R550-7	Sh3kbp1	SH3 domain-containing kinase-binding protein 1	4.92833	0.000149853	0.235513	846820000
Q8BMA6	Srp68	Signal recognition particle subunit SRP68	3.59694	0.00157357	0.235437	933530000
P42208	2020-09-02	Septin-2	3.8101	0.00108147	0.233555	1069700000
P62274	Rps29	40S ribosomal protein S29	0.523875	0.415437	0.219612	1049000000
Q9D024;Q9D024-2;Q9D024-3	Ccdc47	Coiled-coil domain-containing protein 47	1.71551	0.0495287	0.231217	1053000000
Q9D8N0	Eef1g	Elongation factor 1-gamma	2.93789	0.00537556	0.231201	2493500000
Q9JJI8	Rpl38	60S ribosomal protein L38	1.76189	0.0454403	0.229153	945920000
Q3U7R1;Q3U7R1-2	Esyt1	Extended synaptotagmin-1	2.27162	0.0180751	0.226632	458690000
Q8VE99	Ccdc115	Coiled-coil domain-containing protein 115	1.81739	0.0410901	0.226593	362670000
Q8BMJ3	Eif1ax	Eukaryotic translation initiation factor 1A, X-chromosomal	0.73801	0.284912	0.0856723	1037400000
O54984	Asna1	ATPase Asna1	2.0319	0.0278673	0.225417	599820000
O88851	Rbbp9	Putative hydrolase RBBP9	2.24059	0.0191388	0.225048	1124700000
Q64674	Srm	Spermidine synthase	2.13467	0.0232401	0.22484	875720000
Q6PHZ2;Q6PHZ2-2;Q6PHZ2-4;Q6PHZ2-5	Camk2d	Calcium/calmodulin-dependent protein kinase type II subunit delta	1.97934	0.0306343	0.224067	1739800000
P21107-2	Tpm3	Tropomyosin alpha-3 chain	2.81587	0.00667819	0.223852	44845000000
Q9DBH5	Lman2	Vesicular integral-membrane protein VIP36	2.18847	0.0210427	0.223196	254150000
Q9QXT0	Cnpy2	Protein canopy homolog 2	0.404966	0.511481	0.0703171	1031400000
P23506;P23506-2	Pcmt1	Protein-L-isoaspartate(D-aspartate) O-methyltransferase	0.0495404	0.925064	0.0149177	1030600000
O09106	Hdac1	Histone deacetylase 1	1.29655	0.103412	-0.294161	1030600000
P21550	Eno3	Beta-enolase	1.60834	0.0593206	0.209411	1029800000
Q91VJ5	Pqbp1	Polyglutamine-binding protein 1	0.269444	0.649126	-0.0405385	1027700000
Q9WUM5	Suclg1	Succinyl-CoA ligase [ADP/GDP-forming] subunit alpha, mitochondrial	1.9178	0.034315	0.223144	1501000000
Q9DB26	Phyhd1	Phytanoyl-CoA dioxygenase domain-containing protein 1	3.26342	0.00289843	0.222752	4368400000
Q9D172	D10Jhu81e	ES1 protein homolog, mitochondrial	2.92561	0.00545762	0.220744	2192900000
Q8BWG8-2;Q8BWG8	Arrb1	Beta-arrestin-1	0.104056	0.852442	-0.0183567	1019500000
P17427	Ap2a2	AP-2 complex subunit alpha-2	2.12163	0.0238201	0.220652	566520000
Q8BMK4	Ckap4	Cytoskeleton-associated protein 4	1.74461	0.046866	0.220408	1530000000
Q99KI0	Aco2	Aconitate hydratase, mitochondrial	5.42623	6.12e-05	0.22007	8724800000
Q62422	Ostf1	Osteoclast-stimulating factor 1	2.52873	0.0112614	0.219946	3249600000
E9Q394-2;E9Q394	Akap13		1.25359	0.112197	0.248468	1012100000
Q9CQF9	Pcyox1	Prenylcysteine oxidase	0.797221	0.255959	-0.126979	1012000000
Q9DBJ1;O70250	Pgam1	Phosphoglycerate mutase 1	2.73596	0.00775819	0.219926	12791000000
Q9CWL8	Ctnnbl1	Beta-catenin-like protein 1	1.5108	0.070783	-0.252725	1009700000
Q8CHT0	Aldh4a1	Delta-1-pyrroline-5-carboxylate dehydrogenase, mitochondrial	1.98441	0.0304149	0.219769	360980000
P30999-2;P30999-3;P30999	Ctnnd1	Catenin delta-1	1.81674	0.0411207	0.219182	399750000
Q99JW2	Acy1	Aminoacylase-1	3.53881	0.00174954	0.218536	724960000
Q91VM9;Q91VM9-2	Ppa2	Inorganic pyrophosphatase 2, mitochondrial	0.0820618	0.885626	-0.0131207	1002800000
Q8C0C7	Farsa	Phenylalanine--tRNA ligase alpha subunit	2.22266	0.0197778	0.216582	1033500000
Q99KN9;Q99KN9-2	Clint1	Clathrin interactor 1	2.16881	0.0216976	0.216442	637720000
Q64514-2;Q64514	Tpp2	Tripeptidyl-peptidase 2	2.1289	0.0235087	0.216182	249260000
P62259	Ywhae	14-3-3 protein epsilon	4.32901	0.0004218	0.214651	35146000000
Q3TLH4-5;Q3TLH4	Prrc2c	Protein PRRC2C	1.8644	0.0377503	0.214466	810910000
Q8K352	Sash3	SAM and SH3 domain-containing protein 3	0.710145	0.299215	0.166953	997170000
P14869	Rplp0	60S acidic ribosomal protein P0	2.1193	0.0238472	0.214458	2355500000
P14824	Anxa6	Annexin A6	2.94881	0.00527691	0.213815	3407200000
Q99L04	Dhrs1	Dehydrogenase/reductase SDR family member 1	0.405117	0.511481	0.0745186	989170000
P68404-2;P68404	Prkcb	Protein kinase C beta type	2.92878	0.00544626	0.213776	1309600000
Q99KK7	Dpp3	Dipeptidyl peptidase 3	0.63052	0.346111	0.0772179	987540000
P60229	Eif3e	Eukaryotic translation initiation factor 3 subunit E	2.06611	0.0262022	0.21359	578210000
P62897;CON__P62894	Cycs	Cytochrome c, somatic	0.0423256	0.934943	-0.0201312	984240000
Q62425	Ndufa4	Cytochrome c oxidase subunit NDUFA4	1.57556	0.0627335	0.242078	984150000
P68510	Ywhah	14-3-3 protein eta	2.60708	0.00974388	0.213468	19485000000
Q8K1B8	Fermt3	Fermitin family homolog 3	3.06237	0.00424923	0.213358	4524100000
P00493	Hprt1	Hypoxanthine-guanine phosphoribosyltransferase	2.06465	0.0262676	0.213172	1856900000
O70325-2;O70325;O70325-3	Gpx4	Phospholipid hydroperoxide glutathione peroxidase, mitochondrial	1.04561	0.161928	-0.106013	981570000
Q3URD3-4;Q3URD3-3	Slmap	Sarcolemmal membrane-associated protein	1.9655	0.0314031	0.212273	1257400000
P97760	Polr2c	DNA-directed RNA polymerase II subunit RPB3	1.13433	0.139025	-0.165458	979340000
Q9JLJ2	Aldh9a1	4-trimethylaminobutyraldehyde dehydrogenase	2.62295	0.00947406	0.211288	3299900000
Q8VBV7	Cops8	COP9 signalosome complex subunit 8	2.12333	0.0237484	0.210622	671540000
P40240	Cd9	CD9 antigen	0.14598	0.797766	-0.07058	970330000
P61290	Psme3	Proteasome activator complex subunit 3	1.34427	0.094895	-0.172068	969100000
Q8CAQ8-2;Q8CAQ8;Q8CAQ8-5;Q8CAQ8-4	Immt	MICOS complex subunit Mic60	2.11929	0.0238472	0.210208	1834600000
Q9WU78;Q9WU78-3;Q9WU78-2	Pdcd6ip	Programmed cell death 6-interacting protein	2.99023	0.00486808	0.209854	3546500000
Q01768	Nme2	Nucleoside diphosphate kinase B	1.88095	0.0366766	0.208787	2897700000
Q04207;Q04207-2	Rela	Transcription factor p65	2.02063	0.0284068	0.208389	504250000
P21107	Tpm3	Tropomyosin alpha-3 chain	1.68409	0.0521892	0.218166	965030000
P62855	Rps26	40S ribosomal protein S26	0.0576824	0.914855	-0.0198018	964460000
Q9EP69	Sacm1l	Phosphatidylinositide phosphatase SAC1	0.0503627	0.924432	0.0152266	963060000
Q6PDI5-2;Q6PDI5	Ecm29	Proteasome-associated protein ECM29 homolog	2.19344	0.0208416	0.208134	568940000
Q91WQ3	Yars	Tyrosine--tRNA ligase, cytoplasmic;Tyrosine--tRNA ligase, cytoplasmic, N-terminally processed	2.26518	0.0182406	0.207765	2509600000
P10126;P62631	Eef1a1	Elongation factor 1-alpha 1	4.69637	0.00022324	0.206927	64640000000
Q9D880	Timm50	Mitochondrial import inner membrane translocase subunit TIM50	1.73937	0.0472251	0.206632	126950000
Q9WUQ2	Preb	Prolactin regulatory element-binding protein	2.24874	0.0188542	0.206632	308060000
P97807-2;P97807	Fh	Fumarate hydratase, mitochondrial	1.80544	0.0418842	0.206373	729980000
P55772	Entpd1	Ectonucleoside triphosphate diphosphohydrolase 1	0.388098	0.527077	-0.0685196	954020000
P37040	Por	NADPH--cytochrome P450 reductase	1.76643	0.0450685	0.206198	399960000
P42669	Pura	Transcriptional activator protein Pur-alpha	1.97541	0.0308213	0.206085	1667400000
Q9CY27	Tecr	Very-long-chain enoyl-CoA reductase	0.608993	0.360212	-0.164659	948340000
P35486	Pdha1	Pyruvate dehydrogenase E1 component subunit alpha, somatic form, mitochondrial	2.26897	0.0181165	0.205977	662880000
Q9DB77	Uqcrc2	Cytochrome b-c1 complex subunit 2, mitochondrial	3.03127	0.00451961	0.205703	3331000000
Q91V41	Rab14	Ras-related protein Rab-14	3.6335	0.00148312	0.204905	4271500000
Q3TDE8	Znf691	Zinc finger protein 691	1.25177	0.11249	-0.192462	946420000
P62264	Rps14	40S ribosomal protein S14	2.67066	0.00873443	0.204658	5354000000
Q99LU0;Q9CQD4	Chmp1b1;Chmp1b2	Charged multivesicular body protein 1b-1;Charged multivesicular body protein 1b-2	0.4656	0.46174	-0.113488	945250000
P08249	Mdh2	Malate dehydrogenase, mitochondrial	3.46845	0.00199562	0.204328	10476000000
Q60605-2;Q60605	Myl6	Myosin light polypeptide 6	2.42185	0.0137512	0.20431	6487800000
Q9CPY7-2;Q9CPY7	Lap3	Cytosol aminopeptidase	2.98636	0.00489839	0.203468	6655000000
Q9CPQ1	Cox6c	Cytochrome c oxidase subunit 6C	0.371765	0.542914	-0.459647	941730000
Q9QUH0	Glrx	Glutaredoxin-1	0.135493	0.809577	0.0296524	939760000
P30416	Fkbp4	Peptidyl-prolyl cis-trans isomerase FKBP4;Peptidyl-prolyl cis-trans isomerase FKBP4, N-terminally processed	0.51343	0.423736	-0.0689873	936770000
O54824-2;O54824	Il16	Pro-interleukin-16;Interleukin-16	3.03077	0.00451961	0.2029	1863300000
Q6ZWX6	Eif2s1	Eukaryotic translation initiation factor 2 subunit 1	2.59625	0.00991804	0.202546	1532600000
Q9JHI5	Ivd	Isovaleryl-CoA dehydrogenase, mitochondrial	1.96457	0.0314444	0.200909	900190000
Q91W50	Csde1	Cold shock domain-containing protein E1	2.44573	0.0131055	0.200308	855980000
Q8C3X2;Q8C3X2-2	Ccdc90b	Coiled-coil domain-containing protein 90B, mitochondrial	2.16345	0.0219273	0.200081	352210000
Q9CQQ7	Atp5f1	ATP synthase F(0) complex subunit B1, mitochondrial	1.17054	0.130785	0.234644	926840000
Q8R344	Ccdc12	Coiled-coil domain-containing protein 12	1.16905	0.131089	-0.191373	926050000
Q9QYJ0	Dnaja2	DnaJ homolog subfamily A member 2	0.290039	0.627276	0.0916536	925020000
Q91XI1;Q91XI1-2	Dus3l	tRNA-dihydrouridine(47) synthase [NAD(P)(+)]-like	0.906387	0.210255	-0.187996	924520000
Q80SY5	Prpf38b	Pre-mRNA-splicing factor 38B	0.65459	0.330497	-0.144566	924020000
P12815;P12815-2	Pdcd6	Programmed cell death protein 6	2.17158	0.0216582	0.199906	1008600000
Q9CR62	Slc25a11	Mitochondrial 2-oxoglutarate/malate carrier protein	1.34591	0.0946069	0.182503	920160000
Q9CQU0	Txndc12	Thioredoxin domain-containing protein 12	0.215316	0.710305	0.0627757	919570000
P50396	Gdi1	Rab GDP dissociation inhibitor alpha	1.8612	0.0379312	0.199841	1118600000
P56812	Pdcd5	Programmed cell death protein 5	0.307044	0.606643	0.0609673	918350000
Q9D2U9;Q8CGP0	Hist3h2ba;Hist3h2bb	Histone H2B type 3-A;Histone H2B type 3-B	0.256022	0.663665	-0.14571	916470000
P05064	Aldoa	Fructose-bisphosphate aldolase A	4.02361	0.00074897	0.199777	25298000000
O88958	Gnpda1	Glucosamine-6-phosphate isomerase 1	2.23689	0.0192482	0.199682	1203900000
Q9D6N5	Drap1	Dr1-associated corepressor	0.208423	0.716795	-0.0618335	915940000
Q62167;P16381	Ddx3x;D1Pas1	ATP-dependent RNA helicase DDX3X;Putative ATP-dependent RNA helicase Pl10	3.41465	0.00219669	0.199465	3244300000
C0HKD9;C0HKD8			1.52785	0.0683693	-0.201602	910720000
A3KMP2;A3KMP2-2	Ttc38	Tetratricopeptide repeat protein 38	2.00571	0.0292514	0.198654	333690000
B2RXS4	Plxnb2	Plexin-B2	1.21594	0.120017	-0.109451	909290000
Q06185	Atp5i	ATP synthase subunit e, mitochondrial	2.41979	0.0137886	0.197766	529480000
O55022	Pgrmc1	Membrane-associated progesterone receptor component 1	0.259824	0.659306	0.0497827	908010000
Q8BH86;Q8BH86-2		UPF0317 protein C14orf159 homolog, mitochondrial	2.28011	0.0177936	0.197491	521210000
Q922D8	Mthfd1	C-1-tetrahydrofolate synthase, cytoplasmic;Methylenetetrahydrofolate dehydrogenase;Methenyltetrahydrofolate cyclohydrolase;Formyltetrahydrofolate synthetase;C-1-tetrahydrofolate synthase, cytoplasmic, N-terminally processed	2.21228	0.0201243	0.197452	947020000
P97450	Atp5j	ATP synthase-coupling factor 6, mitochondrial	1.24957	0.112867	0.252972	905110000
O35658	C1qbp	Complement component 1 Q subcomponent-binding protein, mitochondrial	1.49108	0.0732149	0.268286	904820000
P62141	Ppp1cb	Serine/threonine-protein phosphatase PP1-beta catalytic subunit	0.612927	0.357274	0.0995651	904280000
Q61409	Pde3b	cGMP-inhibited 3,5-cyclic phosphodiesterase B	2.78992	0.00700265	0.196334	870510000
Q91WK2	Eif3h	Eukaryotic translation initiation factor 3 subunit H	3.61949	0.00151802	0.195598	1000900000
P48758	Cbr1	Carbonyl reductase [NADPH] 1	2.10137	0.0246711	0.195213	3849200000
Q8BX80;Q8BX80-2	Engase	Cytosolic endo-beta-N-acetylglucosaminidase	0.554083	0.395479	-0.0893696	899170000
P67871	Csnk2b	Casein kinase II subunit beta	0.439284	0.482033	0.0695233	898800000
Q9JKR6	Hyou1	Hypoxia up-regulated protein 1	4.23266	0.000505925	0.194764	2920500000
Q99JW4;Q91XD2	Lims1	LIM and senescent cell antigen-like-containing domain protein 1	1.07115	0.155396	0.163695	894790000
P63037	Dnaja1	DnaJ homolog subfamily A member 1	0.209887	0.715672	-0.0362548	893560000
P16125	Ldhb	L-lactate dehydrogenase B chain	2.38276	0.0147573	0.1943	46399000000
Q99PL5;Q99PL5-4;Q99PL5-3;Q99PL5-2;Q99PL5-7;Q99PL5-5;Q99PL5-8;Q99PL5-6;Q99PL5-10;Q99PL5-9;Q99PL5-11;Q99PL5-12	Rrbp1	Ribosome-binding protein 1	2.48248	0.0122624	0.193832	25515000000
P26443	Glud1	Glutamate dehydrogenase 1, mitochondrial	2.87659	0.00602564	0.192788	8315100000
Q9D0F9	Pgm1	Phosphoglucomutase-1	0.861033	0.228181	0.166055	889950000
Q80WJ7	Mtdh	Protein LYRIC	2.44923	0.0130318	0.191446	7470400000
O08573-3;O08573-2;O08573	Lgals9	Galectin-9	1.88093	0.0366766	0.190695	2298600000
Q9JHW2	Nit2	Omega-amidase NIT2	2.7639	0.00738086	0.190525	510070000
P53564-3	Cux1	Homeobox protein cut-like 1	0.136896	0.808487	-0.0277704	886780000
P52480;P53657	Pkm	Pyruvate kinase PKM	4.47099	0.000330298	0.189539	34206000000
P34056-2;P34056-3;P34056;P34056-4	Tfap2a	Transcription factor AP-2-alpha	0.0350703	0.945201	-0.13434	886630000
Q9D051	Pdhb	Pyruvate dehydrogenase E1 component subunit beta, mitochondrial	0.828681	0.242029	0.132917	885350000
O08709	Prdx6	Peroxiredoxin-6	2.4324	0.0134627	0.189141	2099100000
Q91ZX7;Q9JI18	Lrp1	Prolow-density lipoprotein receptor-related protein 1;Low-density lipoprotein receptor-related protein 1 85 kDa subunit;Low-density lipoprotein receptor-related protein 1 515 kDa subunit;Low-density lipoprotein receptor-related protein 1 intracellular domain	4.30688	0.000440484	0.188189	4405500000
P62862	Fau	40S ribosomal protein S30	1.35095	0.0936827	0.222507	880220000
Q6ZWN5	Rps9	40S ribosomal protein S9	0.806233	0.251701	0.102594	879250000
Q9Z0S1	Bpnt1	3(2),5-bisphosphate nucleotidase 1	0.258149	0.661403	0.0620782	879170000
Q9CWF2	Tubb2b	Tubulin beta-2B chain	0.52188	0.416878	0.798706	878090000
P55302	Lrpap1	Alpha-2-macroglobulin receptor-associated protein	0.570895	0.384009	0.161463	877480000
Q60932-2;Q60932	Vdac1	Voltage-dependent anion-selective channel protein 1	1.99648	0.0297302	0.187097	3651000000
Q9JM76	Arpc3	Actin-related protein 2/3 complex subunit 3	2.03927	0.0274918	0.186911	3424200000
Q9JI11	Stk4	Serine/threonine-protein kinase 4;Serine/threonine-protein kinase 4 37kDa subunit;Serine/threonine-protein kinase 4 18kDa subunit	2.00692	0.0291949	0.186757	758470000
Q05D44	Eif5b	Eukaryotic translation initiation factor 5B	2.58382	0.0101723	0.185178	890720000
Q9CQV8	Ywhab	14-3-3 protein beta/alpha;14-3-3 protein beta/alpha, N-terminally processed	3.2279	0.00311019	0.183384	10438000000
Q9CY66-3;Q9CY66-2;Q9CY66	Gar1	H/ACA ribonucleoprotein complex subunit 1	1.02571	0.168225	-0.154107	872060000
P23116	Eif3a	Eukaryotic translation initiation factor 3 subunit A	3.3029	0.00268899	0.181881	2210200000
Q9JL62	Gltp	Glycolipid transfer protein	0.925346	0.202735	0.197162	867300000
P46638	Rab11b	Ras-related protein Rab-11B	2.04722	0.0271791	0.181452	2666700000
Q9R0P4	Smap	Small acidic protein	0.306174	0.607436	-0.0956723	864070000
Q3TQI7		Uncharacterized protein C9orf78 homolog	1.37596	0.0895084	-0.18133	863050000
Q9D1Q6	Erp44	Endoplasmic reticulum resident protein 44	0.0273592	0.958236	-0.00439737	857740000
P61082	Ube2m	NEDD8-conjugating enzyme Ubc12	0.393727	0.522197	0.0962886	857020000
Q9CR00	Psmd9	26S proteasome non-ATPase regulatory subunit 9	0.0926104	0.868803	-0.0213446	856540000
P61202;P61202-2	Cops2	COP9 signalosome complex subunit 2	1.1562	0.133883	0.119844	856400000
Q91Z67;Q91Z69	Srgap2	SLIT-ROBO Rho GTPase-activating protein 2	0.230342	0.692343	0.0243867	856180000
Q6NZJ6;Q6NZJ6-2	Eif4g1	Eukaryotic translation initiation factor 4 gamma 1	1.96921	0.0311873	0.180919	748030000
Q61166;Q6PER3	Mapre1	Microtubule-associated protein RP/EB family member 1	2.17689	0.0214473	0.180852	4982200000
P35278	Rab5c	Ras-related protein Rab-5C	2.21663	0.0199792	0.180762	2280500000
Q8BT60;P59108;Q8BLR2;Q0VE82;Q9DC53;Q8JZW4	Cpne3	Copine-3	0.203987	0.72084	0.0429336	855540000
Q8K003	Tma7	Translation machinery-associated protein 7	0.535195	0.408465	-0.258858	853460000
Q9CX34	Sugt1	Suppressor of G2 allele of SKP1 homolog	0.0201949	0.969127	0.00279329	852840000
O35638	Stag2	Cohesin subunit SA-2	1.13215	0.139427	-0.160962	852130000
P52503	Ndufs6	NADH dehydrogenase [ubiquinone] iron-sulfur protein 6, mitochondrial	0.989974	0.17941	0.217269	851530000
P14206	Rpsa	40S ribosomal protein SA	2.80187	0.00685452	0.180184	8075500000
Q3TRM8	Hk3	Hexokinase-3	1.74912	0.0465187	0.17886	2777900000
Q61249;Q9QZ29	Igbp1	Immunoglobulin-binding protein 1	0.0678577	0.902156	-0.0113535	848030000
P63101	Ywhaz	14-3-3 protein zeta/delta	3.66817	0.00138945	0.178632	29947000000
Q8CIH5;Q9QZE2-2;Q9QZE2	Plcg2	1-phosphatidylinositol 4,5-bisphosphate phosphodiesterase gamma-2	1.76456	0.0451949	0.178189	2856000000
Q60591;Q60591-2;Q60591-4	Nfatc2	Nuclear factor of activated T-cells, cytoplasmic 2	1.88775	0.0363345	0.177641	550660000
Q8VDV3;Q8VDV3-2	Rab3il1	Guanine nucleotide exchange factor for Rab-3A	2.32095	0.0164655	0.177399	2320800000
Q91Z53	Grhpr	Glyoxylate reductase/hydroxypyruvate reductase	1.82462	0.0405979	0.173236	394940000
Q9JM14	Nt5c	5(3)-deoxyribonucleotidase, cytosolic type	1.26726	0.109231	0.224697	840070000
Q99KB8-2;Q99KB8	Hagh	Hydroxyacylglutathione hydrolase, mitochondrial	0.954989	0.192149	0.0997903	839230000
P26883	Fkbp1a	Peptidyl-prolyl cis-trans isomerase FKBP1A	1.22512	0.117994	-0.159213	839150000
Q3UM45	Ppp1r7	Protein phosphatase 1 regulatory subunit 7	2.47001	0.0125665	0.172738	2934600000
Q8CIN4	Pak2	Serine/threonine-protein kinase PAK 2;PAK-2p27;PAK-2p34	4.30225	0.000444079	0.170987	3953400000
Q8VHN8;Q8VHN8-2;Q8VHN8-3	Nudt16l1	Protein syndesmos	1.16562	0.131839	-0.21269	835110000
P70248	Myo1f	Unconventional myosin-If	1.81022	0.0415831	0.170962	1121800000
Q61233;Q99K51;Q3V0K9	Lcp1	Plastin-2	3.20431	0.00324508	0.169365	28169000000
P62702	Rps4x	40S ribosomal protein S4, X isoform	2.48795	0.0121863	0.169247	7536400000
Q11011	Npepps	Puromycin-sensitive aminopeptidase	2.60755	0.00974388	0.168658	1262900000
Q9WTP6-2;Q9WTP6	Ak2	Adenylate kinase 2, mitochondrial;Adenylate kinase 2, mitochondrial, N-terminally processed	1.3152	0.100405	0.234627	830030000
Q922Q8	Lrrc59	Leucine-rich repeat-containing protein 59	2.12063	0.0238472	0.168591	2442400000
P05201	Got1	Aspartate aminotransferase, cytoplasmic	0.796053	0.25629	-0.129709	827380000
Q8K449;Q8K442;Q8K441	Abca9	ATP-binding cassette sub-family A member 9	0.155686	0.784409	0.0259346	827030000
Q99L45	Eif2s2	Eukaryotic translation initiation factor 2 subunit 2	1.86282	0.0378197	0.166191	884910000
Q9D0R2	Tars	Threonine--tRNA ligase, cytoplasmic	0.465536	0.46174	0.0694105	825730000
Q8BYI6;Q8BYI6-2;Q8BYI6-3	Lpcat2	Lysophosphatidylcholine acyltransferase 2	2.84993	0.00629946	0.166059	6801800000
O70503;O70503-2	Hsd17b12	Very-long-chain 3-oxoacyl-CoA reductase	1.65777	0.0545047	-0.160382	824420000
Q91ZJ5-2;Q91ZJ5	Ugp2	UTP--glucose-1-phosphate uridylyltransferase	1.92868	0.0336283	0.16313	1184300000
Q9CZ42-2	Carkd	ATP-dependent (S)-NAD(P)H-hydrate dehydratase	1.88208	0.0366371	0.16299	951930000
Q6WVG3	Kctd12	BTB/POZ domain-containing protein KCTD12	3.80892	0.00108227	0.16278	15186000000
P35991;Q60629;Q8CBF3-2;P29319;Q8CBF3;P54763;P54763-4;P54763-2;P54761;P54754;Q62413	Btk	Tyrosine-protein kinase BTK	1.87614	0.0369955	0.16188	559920000
Q8K354	Cbr3	Carbonyl reductase [NADPH] 3	1.82288	0.0407188	0.161759	1081200000
Q60739-2;Q60739	Bag1	BAG family molecular chaperone regulator 1	1.35279	0.0934554	-0.14692	814720000
O54734	Ddost	Dolichyl-diphosphooligosaccharide--protein glycosyltransferase 48 kDa subunit	1.72954	0.0482003	0.160905	2816600000
Q9D358	Acp1	Low molecular weight phosphotyrosine protein phosphatase	0.0591548	0.914183	0.0125857	813520000
Q8VDJ3	Hdlbp	Vigilin	6.08735	1.96e-05	0.160462	6400700000
Q91VI7	Rnh1	Ribonuclease inhibitor	2.91799	0.00554694	0.160408	7061200000
Q64442	Sord	Sorbitol dehydrogenase	2.22436	0.0197186	0.157181	1304700000
Q6IRU2	Tpm4	Tropomyosin alpha-4 chain	0.102005	0.855164	0.0277012	807140000
O70252	Hmox2	Heme oxygenase 2	2.18626	0.0210973	0.155543	2334900000
Q9DCC4	Pycrl	Pyrroline-5-carboxylate reductase 3	0.3912	0.524091	0.105703	802170000
P68040	Gnb2l1	Guanine nucleotide-binding protein subunit beta-2-like 1;Guanine nucleotide-binding protein subunit beta-2-like 1, N-terminally processed	2.29513	0.01729	0.154804	6203100000
Q9D6R2;Q9D6R2-2	Idh3a	Isocitrate dehydrogenase [NAD] subunit alpha, mitochondrial	2.15247	0.0223674	0.154502	1679200000
Q8CG76	Akr7a2	Aflatoxin B1 aldehyde reductase member 2	0.883414	0.219149	0.107584	800860000
Q69ZK0;Q69ZK0-2	Prex1	Phosphatidylinositol 3,4,5-trisphosphate-dependent Rac exchanger 1 protein	1.34932	0.0939471	0.214233	800700000
P47754	Capza2	F-actin-capping protein subunit alpha-2	1.88683	0.0363824	0.153577	9110500000
Q04447	Ckb	Creatine kinase B-type	2.29802	0.0172368	0.151825	61225000000
P99028	Uqcrh	Cytochrome b-c1 complex subunit 6, mitochondrial	1.54465	0.0662955	0.289663	798810000
P47757-2;P47757-4	Capzb	F-actin-capping protein subunit beta	1.86703	0.0376012	0.15145	13062000000
Q9DC16	Ergic1	Endoplasmic reticulum-Golgi intermediate compartment protein 1	0.063469	0.90806	0.021943	796020000
Q8K1H1	Tdrd7	Tudor domain-containing protein 7	0.0890507	0.87506	0.0331843	795060000
P48025;Q8BZ25	Syk	Tyrosine-protein kinase SYK	1.90556	0.0351822	0.151088	2327000000
P60766;P60766-1;Q9ER71-2;Q9ER71	Cdc42	Cell division control protein 42 homolog	1.81403	0.0412829	0.149595	6182800000
P80316	Cct5	T-complex protein 1 subunit epsilon	1.96638	0.0313654	0.148779	3753800000
Q9CR68	Uqcrfs1	Cytochrome b-c1 complex subunit Rieske, mitochondrial;Cytochrome b-c1 complex subunit 11	0.39028	0.525011	0.0742926	790790000
P35700	Prdx1	Peroxiredoxin-1	2.03145	0.0278729	0.147822	20279000000
Q8BIF9	Znf787	Zinc finger protein 787	0.232456	0.690451	-0.0678251	789070000
Q8CHP8	Pgp	Phosphoglycolate phosphatase	1.08127	0.152587	0.15964	788950000
Q9ERL7	Gmfg	Glia maturation factor gamma	0.437645	0.482767	0.106577	788190000
Q921M7	Fam49b	Protein FAM49B	2.51741	0.0114969	0.146867	12373000000
P14211	Calr	Calreticulin	2.20416	0.0204278	0.138304	20460000000
Q02780-3;Q02780-2;Q02780-7;Q02780-4;Q02780;Q02780-5;Q02780-6	Nfia	Nuclear factor 1 A-type	0.835231	0.239181	-0.142693	784180000
P80317;Q61390	Cct6a	T-complex protein 1 subunit zeta	2.55932	0.0106333	0.134745	3864400000
P29341	Pabpc1	Polyadenylate-binding protein 1	2.24967	0.0188498	0.132822	8359200000
P26043	Rdx	Radixin	1.93874	0.0329654	0.127831	836590000
Q99L47	St13	Hsc70-interacting protein	2.17662	0.0214473	0.127523	4272100000
P42932	Cct8	T-complex protein 1 subunit theta	2.60357	0.00979591	0.126853	3627500000
P20029	Hspa5	78 kDa glucose-regulated protein	2.26148	0.0183789	0.114799	29712000000
Q9D115	Znf706	Zinc finger protein 706	0.418326	0.499385	-0.561702	776950000
P08113	Hsp90b1	Endoplasmin	1.99686	0.0297287	0.109035	20855000000
Q9CPT4	Mydgf	Myeloid-derived growth factor	0.586308	0.374414	-0.0917132	774860000
Q9D8X1	Cutc	Copper homeostasis protein cutC homolog	0.690141	0.310832	0.110272	772020000
Q91WU5	As3mt	Arsenite methyltransferase	2.37279	0.014979	0.108861	2120400000
P09103	P4hb	Protein disulfide-isomerase	2.79578	0.0069343	0.0997931	16515000000
Q9D3D9	Atp5d	ATP synthase subunit delta, mitochondrial	0.723176	0.292357	0.180204	770550000
P54822	Adsl	Adenylosuccinate lyase	1.1578	0.133578	0.122697	768850000
Q62084	Ppp1r14b	Protein phosphatase 1 regulatory subunit 14B	0.0168353	0.973017	0.00662263	768040000
Q9ET26	Rnf114	E3 ubiquitin-protein ligase RNF114	0.0214542	0.967811	-0.00615565	767480000
Q9D8T2	Gsdmdc1	Gasdermin-D	1.6439	0.055919	0.157908	764250000
P28474;Q64437	Adh5	Alcohol dehydrogenase class-3	1.75294	0.0462139	0.0945078	4259400000
P63087-2;P63087	Ppp1cc	Serine/threonine-protein phosphatase PP1-gamma catalytic subunit	1.1588	0.133341	-0.145717	759020000
Q8BY35	Fgd2	FYVE, RhoGEF and PH domain-containing protein 2	1.8937	0.0360412	0.0816276	2349900000
Q61316;P48722-2;P48722	Hspa4	Heat shock 70 kDa protein 4	1.71773	0.0493121	0.057048	11024000000
Q61990-2;Q61990;Q61990-3	Pcbp2	Poly(rC)-binding protein 2	3.18072	0.00338635	-0.114592	4705400000
P60335	Pcbp1	Poly(rC)-binding protein 1	1.95362	0.0320248	-0.121514	16662000000
Q922Y1	Ubxn1	UBX domain-containing protein 1	0.264378	0.655311	-0.0595025	756850000
Q9ESZ8-5;Q9ESZ8-4;Q9ESZ8-3;Q9ESZ8-6;Q9ESZ8-2;Q9ESZ8;Q99NI3	Gtf2i	General transcription factor II-I	2.03471	0.0277111	-0.122194	3526200000
Q9D8W5	Psmd12	26S proteasome non-ATPase regulatory subunit 12	0.124584	0.824481	0.0266366	754350000
Q9Z2U0;Q9CWH6	Psma7	Proteasome subunit alpha type-7	1.95062	0.0322063	-0.124422	5733600000
Q8BKC5;Q8BKC5-2;Q8BIV3	Ipo5	Importin-5	1.32698	0.0981801	0.230187	749660000
Q9CQM9	Glrx3	Glutaredoxin-3	0.0368958	0.942332	0.00882154	748650000
Q91VR5	Ddx1	ATP-dependent RNA helicase DDX1	2.90076	0.0057416	-0.127918	10292000000
Q80VD1;Q3TJZ6	Fam98b	Protein FAM98B	1.77529	0.0444565	-0.133488	2305700000
Q91VF2	Hnmt	Histamine N-methyltransferase	1.22741	0.11748	0.17769	747050000
Q60967;O88428	Papss1	Bifunctional 3-phosphoadenosine 5-phosphosulfate synthase 1;Sulfate adenylyltransferase;Adenylyl-sulfate kinase	1.77764	0.0442835	-0.141689	1987100000
Q9QUM9	Psma6	Proteasome subunit alpha type-6	2.54337	0.010983	-0.142538	5379300000
Q9CQJ4	Rnf2	E3 ubiquitin-protein ligase RING2	1.52725	0.0684191	-0.156302	744730000
P08030	Aprt	Adenine phosphoribosyltransferase	0.833874	0.239707	0.111194	742670000
Q62348	Tsn	Translin	1.48834	0.0735823	0.157028	740380000
Q99P88	Nup155	Nuclear pore complex protein Nup155	1.82035	0.0408741	-0.145077	1365800000
P11835	Itgb2	Integrin beta-2	3.67027	0.00138528	-0.150476	7893400000
Q6A4J8-3;Q6A4J8;Q6A4J8-2	Usp7	Ubiquitin carboxyl-terminal hydrolase 7	2.2102	0.0202018	-0.161626	1980600000
Q9D967	Mdp1	Magnesium-dependent phosphatase 1	0.688338	0.311721	0.12002	734310000
Q3U1Z5-2;Q3U1Z5	Gpsm3	G-protein-signaling modulator 3	0.638927	0.340474	0.139054	733150000
Q9R1P4	Psma1	Proteasome subunit alpha type-1	3.97813	0.000801121	-0.162241	6033900000
P09581	Csf1r	Macrophage colony-stimulating factor 1 receptor	0.394001	0.52216	0.0530998	731210000
Q8C1A5	Thop1	Thimet oligopeptidase	2.23502	0.0193053	-0.163634	2596400000
Q9Z2D6-2;Q9Z2D6	Mecp2	Methyl-CpG-binding protein 2	1.72993	0.0481925	-0.169467	12837000000
Q5XJE5	Leo1	RNA polymerase-associated protein LEO1	1.8683	0.0375603	-0.173735	266100000
P19426-2;P19426	Nelfe	Negative elongation factor E	2.04138	0.0274292	-0.17501	244750000
O08579	Emd	Emerin	0.153994	0.786916	0.0655474	728920000
P06537;P06537-3;P06537-5;P06537-2;P06537-4	Nr3c1	Glucocorticoid receptor	2.27348	0.0180154	-0.175191	1075400000
P97384	Anxa11	Annexin A11	0.312877	0.601016	0.0633597	725660000
A2A6A1;A2AKY4	Gpatch8	G patch domain-containing protein 8	2.03574	0.0276695	-0.175552	424230000
P42227-2;P42227;P42227-3	Stat3	Signal transducer and activator of transcription 3	0.122243	0.828165	0.0228403	725110000
P05555;P05555-2	Itgam	Integrin alpha-M	3.40594	0.00222675	-0.175806	7472500000
Q91YI0	Asl	Argininosuccinate lyase	0.3102	0.603514	0.0660739	721530000
Q63850	Nup62	Nuclear pore glycoprotein p62	3.46681	0.00199986	-0.181528	1153600000
Q91VC3	Eif4a3	Eukaryotic initiation factor 4A-III;Eukaryotic initiation factor 4A-III, N-terminally processed	2.21751	0.0199576	-0.182028	6914300000
P62311	Lsm3	U6 snRNA-associated Sm-like protein LSm3	0.77944	0.264005	-0.232555	716100000
Q8C166	Cpne1	Copine-1	0.355196	0.558965	0.0633885	710370000
Q9DCG9	Trmt112	Multifunctional methyltransferase subunit TRM112-like protein	0.0229282	0.966265	-0.00443323	709030000
Q8BH58	Tiprl	TIP41-like protein	0.338871	0.574599	0.0824975	708710000
Q99LC3	Ndufa10	NADH dehydrogenase [ubiquinone] 1 alpha subcomplex subunit 10, mitochondrial	1.17125	0.130696	0.180238	708670000
P97379-2;P97379	G3bp2	Ras GTPase-activating protein-binding protein 2	0.452998	0.471479	0.087706	705990000
Q3THS6;Q91X83	Mat2a	S-adenosylmethionine synthase isoform type-2	2.44954	0.0130318	-0.183062	2212800000
P59114	Pcif1	Phosphorylated CTD-interacting factor 1	1.11541	0.14337	-0.142108	704160000
Q8BWY3	Etf1	Eukaryotic peptide chain release factor subunit 1	0.260034	0.659306	0.0639055	702630000
Q9JLI8;Q9JLI8-2	Sart3	Squamous cell carcinoma antigen recognized by T-cells 3	3.0809	0.00411176	-0.183769	5224900000
P28063	Psmb8	Proteasome subunit beta type-8	2.06223	0.0263916	-0.184989	1867800000
Q9EPU4	Cpsf1	Cleavage and polyadenylation specificity factor subunit 1	2.84655	0.00631049	-0.187376	780880000
Q6PGH2	Hn1l	Hematological and neurological expressed 1-like protein	1.04139	0.163176	-0.187265	696380000
Q9DAR7	Dcps	m7GpppX diphosphatase	3.67134	0.0013844	-0.189052	6262300000
Q9JKV1	Adrm1	Proteasomal ubiquitin receptor ADRM1	0.953542	0.192601	-0.161573	694640000
Q9R059	Fhl3	Four and a half LIM domains protein 3	0.127363	0.820244	0.0255002	693540000
Q99MD9;Q99MD9-2	Nasp	Nuclear autoantigenic sperm protein	1.9336	0.0333036	-0.189473	800140000
Q921T2-2;Q921T2;Q921T2-3	Tor1aip1	Torsin-1A-interacting protein 1	1.86429	0.0377503	-0.190283	3584900000
Q9D7N9	Apmap	Adipocyte plasma membrane-associated protein	0.305049	0.608588	0.0534233	691650000
Q9CZ30;Q9CZ30-2	Ola1	Obg-like ATPase 1	0.638938	0.340474	0.0763551	690590000
P83917	Cbx1	Chromobox protein homolog 1	1.73976	0.0472182	-0.19075	6035000000
Q60953;Q60953-2	Pml	Protein PML	1.37205	0.0902031	-0.268419	689570000
Q61074	Ppm1g	Protein phosphatase 1G	2.85716	0.00621893	-0.191219	4567900000
O89090;O89090-2	Sp1	Transcription factor Sp1	1.59342	0.0606523	-0.240191	688700000
Q9D0B0	Srsf9	Serine/arginine-rich splicing factor 9	2.54542	0.0109432	-0.191934	5736900000
Q9JLV6;Q9JLV6-2	Pnkp	Bifunctional polynucleotide phosphatase/kinase;Polynucleotide 3-phosphatase;Polynucleotide 5-hydroxyl-kinase	1.81552	0.0411734	-0.192385	3416200000
Q9JIF0-2;Q9JIF0-3;Q9JIF0;Q6PAK3	Prmt1	Protein arginine N-methyltransferase 1	1.94956	0.0322585	-0.194261	2023500000
Q62523	Zyx	Zyxin	0.466719	0.46119	0.108831	685430000
Q8R3N6	Thoc1	THO complex subunit 1	2.07777	0.0257983	-0.194274	962290000
Q6ZQL4	Wdr43	WD repeat-containing protein 43	1.97913	0.0306343	-0.194733	292170000
Q3THK7	Gmps	GMP synthase [glutamine-hydrolyzing]	3.94963	0.000848117	-0.195057	2323900000
Q9CYR6	Pgm3	Phosphoacetylglucosamine mutase	0.0528562	0.921735	0.0103683	679110000
Q8BJ05;Q8BJ05-2;Q8BJ05-3;Q8BJ05-4	Zc3h14	Zinc finger CCCH domain-containing protein 14	1.83638	0.039666	-0.195162	779400000
P17433	Spi1	Transcription factor PU.1	1.60747	0.0593206	-0.41983	677060000
O54962	Banf1	Barrier-to-autointegration factor;Barrier-to-autointegration factor, N-terminally processed	1.02954	0.167092	-0.185135	677050000
Q99KR3	Lactb2	Beta-lactamase-like protein 2	0.0756539	0.891974	0.0214615	676030000
P23475	Xrcc6	X-ray repair cross-complementing protein 6	2.24009	0.0191428	-0.197568	891210000
Q9D0T1	Nhp2l1	NHP2-like protein 1;NHP2-like protein 1, N-terminally processed	2.77766	0.00718553	-0.198658	6467600000
P10711;P10711-2;Q9QVN7	Tcea1	Transcription elongation factor A protein 1	2.45344	0.0129733	-0.201907	4778400000
Q9WTM5	Ruvbl2	RuvB-like 2	3.67379	0.00137916	-0.202207	3712000000
P35762	Cd81	CD81 antigen	0.331624	0.582698	-0.144142	668480000
E9Q1P8	Irf2bp2	Interferon regulatory factor 2-binding protein 2	2.82891	0.00652115	-0.203401	1904500000
Q8BH69	Sephs1	Selenide, water dikinase 1	1.82995	0.0401692	-0.203527	1956500000
Q8R138	Tmem119	Transmembrane protein 119	0.890468	0.216171	0.225379	664500000
Q9ERK4	Cse1l	Exportin-2	2.05268	0.0268858	-0.204778	191100000000
Q3ULW8-2;Q3ULW8	Parp3		2.34713	0.015674	-0.20513	825530000
Q8K3C3	Lzic	Protein LZIC	0.33918	0.574473	-0.0843874	662820000
P97797-2;P97797-4	Sirpa	Tyrosine-protein phosphatase non-receptor type substrate 1	0.275696	0.643966	-0.048478	661250000
Q6P542	Abcf1	ATP-binding cassette sub-family F member 1	0.0583155	0.914811	-0.0116004	660810000
Q9R1T2;Q9R1T2-2	Sae1	SUMO-activating enzyme subunit 1;SUMO-activating enzyme subunit 1, N-terminally processed	2.93948	0.0053701	-0.20625	3509800000
P29452	Casp1	Caspase-1;Caspase-1 subunit p20;Caspase-1 subunit p10	0.249185	0.671626	0.0379575	654170000
Q91X20	Ash2l	Set1/Ash2 histone methyltransferase complex subunit ASH2	1.93983	0.0329094	-0.206584	822850000
Q60715-2;Q60715	P4ha1	Prolyl 4-hydroxylase subunit alpha-1	1.13728	0.138381	0.156646	652830000
P60670-2;P60670	Nploc4	Nuclear protein localization protein 4 homolog	0.178383	0.754258	0.0336226	652700000
Q9Z2Y8	Prosc	Proline synthase co-transcribed bacterial homolog protein	1.1752	0.129674	0.15482	652230000
Q8BKT7	Thoc5	THO complex subunit 5 homolog	1.56987	0.0635177	-0.191662	649340000
Q9CQH7	Btf3l4	Transcription factor BTF3 homolog 4	1.50802	0.0710716	0.266689	647470000
O55142	Rpl35a	60S ribosomal protein L35a	1.56233	0.0643281	-0.36448	647420000
Q9CRB9	Chchd3	MICOS complex subunit Mic19	0.647383	0.335319	0.103883	646060000
Q9QZQ8-2	H2afy	Core histone macro-H2A.1	3.38302	0.002303	-0.206963	60309000000
Q8K3X4	Irf2bpl	Interferon regulatory factor 2-binding protein-like	3.91692	0.000892208	-0.207852	910240000
Q8VD65	Pik3r4	Phosphoinositide 3-kinase regulatory subunit 4	0.234559	0.688035	0.306391	642600000
Q6ZPZ3;Q6ZPZ3-2	Zc3h4	Zinc finger CCCH domain-containing protein 4	3.02734	0.00454297	-0.207999	2033300000
Q8CEC0-3;Q8CEC0-2;Q8CEC0	Nup88	Nuclear pore complex protein Nup88	1.36028	0.0922981	-0.16963	639780000
Q7TSG2;Q7TSG2-2	Ctdp1	RNA polymerase II subunit A C-terminal domain phosphatase	1.46681	0.0763414	-0.105703	639310000
Q921X9	Pdia5	Protein disulfide-isomerase A5	0.372049	0.542914	0.08606	637960000
Q8BGT7	Smndc1	Survival of motor neuron-related-splicing factor 30	1.88506	0.0364546	-0.208392	942080000
Q8CHI8-3;Q8CHI8-2;Q8CHI8-4;Q8CHI8;Q8CHI8-5	Ep400	E1A-binding protein p400	2.30074	0.0171493	-0.210315	525670000
P27612	Plaa	Phospholipase A-2-activating protein	0.570041	0.384298	-0.0751673	636250000
O88712;O88712-2;O88712-3	Ctbp1	C-terminal-binding protein 1	2.78314	0.00710407	-0.211106	3928700000
Q9Z1F9	Uba2	SUMO-activating enzyme subunit 2	2.52466	0.0113431	-0.211661	4962000000
O88543	Cops3	COP9 signalosome complex subunit 3	0.17479	0.758812	0.0463704	635880000
Q9D819	Ppa1	Inorganic pyrophosphatase	0.00128698	0.998173	0.000350422	635710000
Q91V64	Isoc1	Isochorismatase domain-containing protein 1	0.483039	0.447955	-0.0725295	635660000
P63073	Eif4e	Eukaryotic translation initiation factor 4E	0.220041	0.704351	-0.327949	635250000
Q8R4X3	Rbm12	RNA-binding protein 12	1.95871	0.0318045	-0.212281	686490000
P61027	Rab10	Ras-related protein Rab-10	0.0976678	0.861777	0.0304988	634440000
O35226;O35226-4;O35226-5	Psmd4	26S proteasome non-ATPase regulatory subunit 4	2.70631	0.00817904	-0.21399	1814000000
Q8VBV3	Exosc2	Exosome complex component RRP4	1.0536	0.159627	-0.140724	631450000
Q7TNE3	Spag7	Sperm-associated antigen 7	0.545413	0.401197	-0.121346	631290000
Q9WU42;Q9WU42-2	Ncor2	Nuclear receptor corepressor 2	2.48794	0.0121863	-0.214026	643860000
Q9DCL8	Ppp1r2	Protein phosphatase inhibitor 2	0.0942303	0.866637	-0.0342275	628740000
Q6ZQI3	Mlec	Malectin	0.119472	0.83123	-0.0212084	628520000
Q99LF4	Rtcb	tRNA-splicing ligase RtcB homolog	3.03462	0.00449824	-0.215126	7497500000
Q9CQR4	Acot13	Acyl-coenzyme A thioesterase 13;Acyl-coenzyme A thioesterase 13, N-terminally processed	1.55739	0.0649775	0.402746	625400000
Q60668-3;Q60668;Q60668-4;Q60668-2	Hnrnpd	Heterogeneous nuclear ribonucleoprotein D0	2.5726	0.0103925	-0.215216	33047000000
Q9JKB1;P58321	Uchl3;Uchl4	Ubiquitin carboxyl-terminal hydrolase isozyme L3;Ubiquitin carboxyl-terminal hydrolase isozyme L4	1.61069	0.0591651	0.213486	624530000
P63024	Vamp3	Vesicle-associated membrane protein 3	1.58697	0.0613935	0.238003	622570000
Q922U1	Prpf3	U4/U6 small nuclear ribonucleoprotein Prp3	1.74668	0.0467259	-0.217155	1302200000
Q9CXL3		Uncharacterized protein C7orf50 homolog	0.43911	0.482045	-0.0851065	621120000
Q9ERR7	2020-09-15	15 kDa selenoprotein	0.257779	0.661742	0.0703655	620990000
Q11136	Pepd	Xaa-Pro dipeptidase	1.63909	0.056463	-0.291811	619630000
P83870	Phf5a	PHD finger-like domain-containing protein 5A	2.35411	0.0155132	-0.217274	2108900000
P16330-2;P16330	Cnp	2,3-cyclic-nucleotide 3-phosphodiesterase	2.60152	0.00983116	-0.217639	532630000
Q6GQT9	Nomo1	Nodal modulator 1	0.217493	0.707557	0.044632	616250000
Q9CQ49	Ncbp2	Nuclear cap-binding protein subunit 2	2.27091	0.0180768	-0.218952	248770000
O70591	Pfdn2	Prefoldin subunit 2	0.490606	0.442096	0.12708	610530000
Q9WTL7	Lypla2	Acyl-protein thioesterase 2	0.371883	0.542914	-0.0741703	609600000
Q8JZX4	Rbm17	Splicing factor 45	3.40385	0.00223394	-0.218968	1780900000
Q9D7H3	RtcA	RNA 3-terminal phosphate cyclase	1.22726	0.11748	-0.142789	607640000
Q9JMH6-2;Q9JMH6	Txnrd1	Thioredoxin reductase 1, cytoplasmic	0.496717	0.436678	0.070808	607140000
P81117	Nucb2	Nucleobindin-2;Nesfatin-1	1.39911	0.0860549	0.206408	606960000
Q5SUR0	Pfas	Phosphoribosylformylglycinamidine synthase	3.10037	0.0039932	-0.219059	3574700000
P50247	Ahcy	Adenosylhomocysteinase	3.70882	0.00129378	-0.221049	6614200000
P28076	Psmb9	Proteasome subunit beta type-9	0.722908	0.29241	-0.158035	604610000
Q9CXG3	Ppil4	Peptidyl-prolyl cis-trans isomerase-like 4	0.851434	0.232581	-0.100726	603180000
Q9ERF3	Wdr61	WD repeat-containing protein 61;WD repeat-containing protein 61, N-terminally processed	0.05244	0.921829	0.0150065	600960000
P48771	Cox7a2	Cytochrome c oxidase subunit 7A2, mitochondrial	0.86655	0.226344	0.970906	600300000
Q9Z172	Sumo3	Small ubiquitin-related modifier 3	0.207028	0.718393	-0.326161	600160000
P17012;P23607	Zfx;Zfa	Zinc finger X-chromosomal protein;Zinc finger autosomal protein	1.80269	0.0420867	-0.221415	290200000
Q91YR7;Q91YR7-2	Prpf6	Pre-mRNA-processing factor 6	2.09132	0.0251379	-0.222836	1867200000
Q8BK67	Rcc2	Protein RCC2	3.15016	0.00361219	-0.223854	12446000000
Q61464-4	Znf638	Zinc finger protein 638	3.62589	0.00150121	-0.223972	2367700000
Q64378	Fkbp5	Peptidyl-prolyl cis-trans isomerase FKBP5;Peptidyl-prolyl cis-trans isomerase FKBP5, N-terminally processed	2.58514	0.0101527	-0.22496	3069800000
O35685	Nudc	Nuclear migration protein nudC	0.104305	0.852216	0.0310985	598230000
Q60676	Ppp5c	Serine/threonine-protein phosphatase 5	1.4983	0.0722859	0.202413	597130000
O35218	Cpsf2	Cleavage and polyadenylation specificity factor subunit 2	3.06712	0.0042206	-0.225155	1122400000
P55264;P55264-2	Adk	Adenosine kinase	0.123741	0.825827	-0.0273145	596960000
Q8R317	Ubqln1	Ubiquilin-1	0.219286	0.705342	0.0817953	596570000
Q8BHG9	Cggbp1	CGG triplet repeat-binding protein 1	1.73094	0.0481161	-0.225828	845670000
P61750	Arf4	ADP-ribosylation factor 4	0.684666	0.313422	0.179989	591990000
P23611	Irf8	Interferon regulatory factor 8	1.85924	0.0379938	-0.22583	847570000
Q8VBW6	Nae1	NEDD8-activating enzyme E1 regulatory subunit	0.74806	0.280127	-0.08012	591030000
Q8BFQ4	Wdr82	WD repeat-containing protein 82	1.45344	0.0779523	-0.209515	590660000
Q9D554	Sf3a3	Splicing factor 3A subunit 3	3.55807	0.0016794	-0.225886	4240300000
P06800-6;P06800-5;P06800	Ptprc	Receptor-type tyrosine-protein phosphatase C	1.83704	0.0396362	-0.227442	636180000
P70444	Bid	BH3-interacting domain death agonist;BH3-interacting domain death agonist p15;BH3-interacting domain death agonist p13;BH3-interacting domain death agonist p11	0.0454171	0.929973	-0.0165879	588270000
Q9ESP1	Sdf2l1	Stromal cell-derived factor 2-like protein 1	1.42356	0.0823525	0.27272	586890000
O35188	Cx3cl1	Fractalkine;Processed fractalkine	0.469146	0.459676	0.138833	585780000
Q61739-2;Q61739	Itga6	Integrin alpha-6;Integrin alpha-6 heavy chain;Integrin alpha-6 light chain	1.59411	0.0606378	-0.165564	585390000
Q4VA53;Q4VA53-3;Q4VA53-2	Pds5b	Sister chromatid cohesion protein PDS5 homolog B	3.77076	0.00115429	-0.227689	2607600000
Q8K1J6;Q8K1J6-2	Trnt1	CCA tRNA nucleotidyltransferase 1, mitochondrial	0.65939	0.32728	-0.0771827	582940000
A2AR02	Ppig	Peptidyl-prolyl cis-trans isomerase G	2.11384	0.0240789	-0.22811	672180000
Q8R1F0	D8Ertd738e	Leydig cell tumor 10 kDa protein homolog	0.937686	0.198304	-0.249602	580700000
P97823;P97823-2	Lypla1	Acyl-protein thioesterase 1	0.322046	0.592452	0.0718758	580530000
P70353	Nfyc	Nuclear transcription factor Y subunit gamma	1.80577	0.0418842	-0.228831	359600000
Q3TEA8;Q3TEA8-2;Q3TEA8-3	Hp1bp3	Heterochromatin protein 1-binding protein 3	2.24538	0.018965	-0.230143	25990000000
Q80UW8	Polr2e	DNA-directed RNA polymerases I, II, and III subunit RPABC1	1.87986	0.0367087	-0.230193	1000500000
P08775	Polr2a	DNA-directed RNA polymerase II subunit RPB1	4.8195	0.000180555	-0.230836	3479200000
P42128	Foxk1	Forkhead box protein K1	2.67786	0.00860082	-0.231464	558290000
Q8C6G8	Wdr26	WD repeat-containing protein 26	0.991737	0.179022	-0.218996	577340000
Q8K4B0	Mta1	Metastasis-associated protein MTA1	1.77826	0.0442531	-0.231599	841450000
Q9DBR1-2;Q9DBR1	Xrn2	5-3 exoribonuclease 2	3.41954	0.00218268	-0.23241	2552300000
Q91W39	Ncoa5	Nuclear receptor coactivator 5	3.04099	0.00443891	-0.232673	1066300000
Q9JL35	Hmgn5	High mobility group nucleosome-binding domain-containing protein 5	1.7006	0.0506927	-0.234902	574350000
Q9D2M8;Q9D2M8-2	Ube2v2	Ubiquitin-conjugating enzyme E2 variant 2	0.518639	0.41967	-0.0756115	574110000
Q9Z0H4-7;Q9Z0H4-5;Q9Z0H4-4;Q9Z0H4;Q9Z0H4-8;Q9Z0H4-2;Q9Z0H4-6;Q9Z0H4-9;Q9Z0H4-11;Q9Z0H4-3	Celf2	CUGBP Elav-like family member 2	4.13866	0.000598831	-0.233045	5901200000
P54726	Rad23a	UV excision repair protein RAD23 homolog A	0.311011	0.602957	-0.0997127	572050000
Q8R3G1	Ppp1r8	Nuclear inhibitor of protein phosphatase 1	1.84357	0.0391355	-0.233232	1311700000
Q8BGW1-2;Q8BGW1;Q8BGW1-3;Q8BGW1-4	Fto	Alpha-ketoglutarate-dependent dioxygenase FTO	1.84244	0.0392074	-0.233268	141940000
Q61136	Prpf4b	Serine/threonine-protein kinase PRP4 homolog	2.68313	0.00850707	-0.233276	982860000
P16254	Srp14	Signal recognition particle 14 kDa protein;Signal recognition particle 14 kDa protein, N-terminally processed	1.05708	0.158896	-0.158146	568590000
Q8BNV1	Trmt2a	tRNA (uracil-5-)-methyltransferase homolog A	4.60623	0.000263845	-0.233791	824270000
Q8BG30	Nelfa	Negative elongation factor A	0.92771	0.20183	-0.171025	567700000
Q80SW1	Ahcyl1	Putative adenosylhomocysteinase 2	0.182497	0.748839	0.0443111	566860000
Q9EQ61	Pes1	Pescadillo homolog	2.71235	0.00810417	-0.234	622360000
Q9Z130	Hnrnpdl	Heterogeneous nuclear ribonucleoprotein D-like	2.529	0.0112614	-0.234128	3034100000
Q91VH6	Memo1	Protein MEMO1	1.40669	0.0847743	-0.177489	565110000
Q8R2M2	Dnttip2	Deoxynucleotidyltransferase terminal-interacting protein 2	2.13024	0.0234572	-0.234794	1003000000
Q8C570	Rae1	mRNA export factor	1.72092	0.0489867	-0.235147	1399500000
Q6PCN7	Hltf	Helicase-like transcription factor	1.40781	0.0846592	-0.165319	563590000
Q8R0A0	Gtf2f2	General transcription factor IIF subunit 2	3.38986	0.00228504	-0.235373	1075100000
Q8BP92	Rcn2	Reticulocalbin-2	0.00431435	0.993495	-0.000973569	563140000
Q8R326;Q8R326-2	Pspc1	Paraspeckle component 1	2.96842	0.00507088	-0.2354	2647100000
Q9R226	Khdrbs3	KH domain-containing, RNA-binding, signal transduction-associated protein 3	3.07489	0.00415736	-0.235912	1078500000
Q08122-2;Q08122-1;Q08122;Q08122-4	Tle3	Transducin-like enhancer protein 3	1.77047	0.0447512	-0.23608	663320000
Q9CXS4;Q9CXS4-2	Cenpv	Centromere protein V	3.70195	0.0013046	-0.236333	4360600000
Q9EPK7;Q9EPK7-2	Xpo7	Exportin-7	1.74129	0.0471208	-0.237487	319420000
Q61595-3;Q61595-10;Q61595-7;Q61595-11;Q61595-2;Q61595-12;Q61595-16;Q61595-14;Q61595-4;Q61595-8;Q61595-13;Q61595-5;Q61595;Q61595-6;Q61595-9;Q61595-15	Ktn1	Kinectin	1.21938	0.119298	0.227552	557050000
Q60931	Vdac3	Voltage-dependent anion-selective channel protein 3	1.42752	0.0817055	0.191173	556860000
O35841	Api5	Apoptosis inhibitor 5	3.35605	0.00241625	-0.239044	4337400000
P36423	Tbxas1	Thromboxane-A synthase	0.961449	0.189498	0.0450944	555330000
P51125;P51125-3;P51125-2;P51125-6;P51125-7;P51125-5;P51125-4	Cast	Calpastatin	0.678629	0.316856	0.122194	553660000
Q9JII5-2;Q9JII5	Dazap1	DAZ-associated protein 1	2.7732	0.00725083	-0.239905	4332300000
Q91W90	Txndc5	Thioredoxin domain-containing protein 5	0.00674355	0.9887	-0.00154479	551740000
Q9CW46;Q9CW46-2	Raver1	Ribonucleoprotein PTB-binding 1	2.76327	0.00738262	-0.239906	2723200000
Q8BIQ5;Q8BIQ5-2	Cstf2	Cleavage stimulation factor subunit 2	2.48118	0.0122863	-0.240448	3336500000
Q8VDM6;Q8VDM6-2;Q8VDM6-3	Hnrnpul1	Heterogeneous nuclear ribonucleoprotein U-like protein 1	5.38146	6.66e-05	-0.241599	13837000000
P46061	Rangap1	Ran GTPase-activating protein 1	5.50645	5.28e-05	-0.241655	1992600000
Q6A026	Pds5a	Sister chromatid cohesion protein PDS5 homolog A	7.85932	8.71e-07	-0.241845	3462400000
Q9WU00;Q9WU00-2	Nrf1	Nuclear respiratory factor 1	0.613352	0.357222	-0.139322	549720000
Q8C878;Q8C878-2	Uba3	NEDD8-activating enzyme E1 catalytic subunit	0.0238815	0.964932	0.00592205	549330000
A2AQ19	Rtf1	RNA polymerase-associated protein RTF1 homolog	1.99353	0.0298829	-0.242159	465480000
O35345	Kpna6	Importin subunit alpha-7	0.316714	0.597244	-0.0816116	548010000
Q99KV1	Dnajb11	DnaJ homolog subfamily B member 11	0.196349	0.730049	-0.0680036	547430000
Q9ESX5	Dkc1	H/ACA ribonucleoprotein complex subunit 4	2.41926	0.0137908	-0.242189	2054400000
Q99KK2;Q99KK2-2	Cmas	N-acylneuraminate cytidylyltransferase	4.3408	0.00041689	-0.242629	5870900000
Q9Z2I9	Sucla2	Succinyl-CoA ligase [ADP-forming] subunit beta, mitochondrial	1.48743	0.0736262	0.231268	546200000
Q61152	Ptpn18	Tyrosine-protein phosphatase non-receptor type 18	0.142444	0.802003	-0.031639	545540000
Q8BU14	Sec62	Translocation protein SEC62	0.114137	0.83803	0.0409144	545360000
Q9JHW4	Eefsec	Selenocysteine-specific elongation factor	0.767565	0.270303	-0.123768	545240000
P84089	Erh	Enhancer of rudimentary homolog	2.9539	0.00522232	-0.242925	11262000000
Q3UKJ7;Q3UKJ7-2	Smu1	WD40 repeat-containing protein SMU1;WD40 repeat-containing protein SMU1, N-terminally processed	2.29769	0.0172368	-0.243013	2217800000
Q03267;Q03267-4;Q03267-5;Q03267-6;Q03267-2;Q03267-3;P81183-2;P81183;Q8C208-3;Q8C208-2;Q8C208;Q8C208-4	Ikzf1	DNA-binding protein Ikaros	4.17063	0.000565579	-0.243236	1926000000
Q8BHJ5	Tbl1xr1	F-box-like/WD repeat-containing protein TBL1XR1	3.6855	0.00134495	-0.243497	1543200000
P70255-2;P70255;P70255-4;P70255-6;P97863-3;P97863-2;P97863	Nfic	Nuclear factor 1 C-type	1.74013	0.0472129	-0.243955	175130000
Q62018;Q62018-3;Q62018-2	Ctr9	RNA polymerase-associated protein CTR9 homolog	3.94308	0.000855514	-0.2442	452770000
Q9D1J1	Necap2	Adaptin ear-binding coat-associated protein 2	0.948511	0.194368	0.181497	539280000
Q61107	Gbp4	Guanylate-binding protein 4	0.187189	0.742712	0.0948444	538150000
Q8BZH4	Pogz	Pogo transposable element with ZNF domain	1.56888	0.0635769	-0.241012	537880000
O70305-2;O70305	Atxn2	Ataxin-2	1.38481	0.0880732	1.39797	536850000
Q8K2T8	Paf1	RNA polymerase II-associated factor 1 homolog	1.5907	0.06091	-0.176414	536390000
Q61183;Q61183-4;Q61183-3;Q61183-2;Q9WVP6	Papola	Poly(A) polymerase alpha	1.06118	0.157916	-0.122005	535220000
P84091	Ap2m1	AP-2 complex subunit mu	0.735788	0.285868	0.0936475	533950000
Q0VGB7	Ppp4r2	Serine/threonine-protein phosphatase 4 regulatory subunit 2	1.96976	0.0311731	-0.244529	744860000
A2ADY9;Q9DAF3	Ddi2	Protein DDI1 homolog 2	0.0842846	0.882123	-0.0179461	533520000
Q6PGH1;Q6PGH1-2	Bud31	Protein BUD31 homolog	2.19141	0.02092	-0.244912	1097700000
Q05CL8;Q05CL8-2	Larp7	La-related protein 7	2.93276	0.00540542	-0.245286	1208100000
Q93092	Taldo1	Transaldolase	2.1088	0.0243169	-0.245633	44289000000
P17563;Q63836	Selenbp1;Selenbp2	Selenium-binding protein 1;Selenium-binding protein 2	0.114984	0.837433	0.0229142	531350000
Q8CGZ0	Cherp	Calcium homeostasis endoplasmic reticulum protein	2.72061	0.0079799	-0.245671	1669900000
O54786	Dffa	DNA fragmentation factor subunit alpha	1.59514	0.060538	-0.174094	529640000
Q3THK3	Gtf2f1	General transcription factor IIF subunit 1	4.34243	0.000416407	-0.245828	793330000
Q62311	Taf6	Transcription initiation factor TFIID subunit 6	2.1192	0.0238472	-0.245877	416880000
Q9ERD8	Parvg	Gamma-parvin	1.12478	0.14113	0.31626	528840000
Q91WD5	Ndufs2	NADH dehydrogenase [ubiquinone] iron-sulfur protein 2, mitochondrial	0.699988	0.30507	0.182073	528010000
Q99K95	Rtfdc1	Protein RTF2 homolog	1.44938	0.0784255	-0.298785	527900000
O09172	Gclm	Glutamate--cysteine ligase regulatory subunit	0.00769614	0.987756	0.0160799	527350000
Q8K2T1;Q8K2T1-2;Q8K2T1-3	Nmral1	NmrA-like family domain-containing protein 1	0.557309	0.393183	0.116906	527340000
Q9D753	Exosc8	Exosome complex component RRP43	3.68756	0.00134107	-0.247062	462220000
P97470	Ppp4c	Serine/threonine-protein phosphatase 4 catalytic subunit	0.786487	0.260578	-0.162516	525760000
Q91WN1	Dnajc9	DnaJ homolog subfamily C member 9	1.93203	0.0333967	-0.247227	530590000
Q6ZPY7;Q6ZPY7-2	Kdm3b	Lysine-specific demethylase 3B	2.92709	0.00545762	-0.247666	832510000
P60122	Ruvbl1	RuvB-like 1	3.88935	0.000940174	-0.248552	2834200000
O88188	Ly86	Lymphocyte antigen 86	1.37816	0.0891929	0.406895	525110000
Q9CPV9	P2ry12	P2Y purinoceptor 12	0.263805	0.655742	0.0730544	524150000
P43406	Itgav	Integrin alpha-V;Integrin alpha-V heavy chain;Integrin alpha-V light chain	1.09483	0.149141	-0.144412	523260000
P21619;P21619-2	Lmnb2	Lamin-B2	4.73071	0.000211885	-0.248936	28167000000
P15105	Glul	Glutamine synthetase	1.30525	0.102005	0.205824	521670000
O35900	Lsm2	U6 snRNA-associated Sm-like protein LSm2	2.39407	0.0144364	-0.249754	1339400000
P60898	Polr2i	DNA-directed RNA polymerase II subunit RPB9	1.16471	0.1319	-0.200116	520990000
Q8K1L5	Ppp1r11	Protein phosphatase 1 regulatory subunit 11	1.07464	0.154528	0.744988	519850000
P55258;Q9DD03;Q8K386	Rab8a	Ras-related protein Rab-8A	0.525441	0.414451	0.128883	519500000
Q8CGC6	Rbm28	RNA-binding protein 28	2.18277	0.0212234	-0.250132	358270000
P43006;P43006-2;P43006-3	Slc1a2	Excitatory amino acid transporter 2	1.07066	0.155396	0.219807	518690000
Q8R332-2;Q8R332-4;Q8R332-3;Q8R332	Nupl1	Nucleoporin p58/p45	1.08613	0.15144	-0.195843	517260000
Q9D868-2;Q9D868	Ppih	Peptidyl-prolyl cis-trans isomerase H	0.499432	0.43455	-0.199395	517120000
Q99LD8	Ddah2	N(G),N(G)-dimethylarginine dimethylaminohydrolase 2	0.200901	0.724795	-0.0283949	517070000
Q9EST5;Q9EST5-2	Anp32b	Acidic leucine-rich nuclear phosphoprotein 32 family member B	1.82113	0.0408322	-0.250231	5770100000
P56959	Fus	RNA-binding protein FUS	3.13674	0.0037041	-0.250459	17811000000
Q62318;Q62318-2	Trim28	Transcription intermediary factor 1-beta	5.65771	4.02e-05	-0.250608	19294000000
Q9JJA4	Wdr12	Ribosome biogenesis protein WDR12	0.851459	0.232581	-0.300737	514300000
P61759	Vbp1	Prefoldin subunit 3	0.900652	0.212536	0.201786	514230000
Q8CCS6-2;Q8CCS6	Pabpn1	Polyadenylate-binding protein 2	1.95842	0.0318045	-0.251735	2312800000
Q8BJY1	Psmd5	26S proteasome non-ATPase regulatory subunit 5	0.377056	0.537899	0.056031	513700000
Q91XF0	Pnpo	Pyridoxine-5-phosphate oxidase	0.0686207	0.902156	0.0247701	513480000
O35864	Cops5	COP9 signalosome complex subunit 5	0.0539666	0.920384	-0.0109467	512660000
P63213	Gng2	Guanine nucleotide-binding protein G(I)/G(S)/G(O) subunit gamma-2	0.558381	0.392372	0.0949418	510990000
Q8C4Y3-3;Q8C4Y3	Nelfb	Negative elongation factor B	3.38515	0.00229784	-0.253822	800590000
Q8BUN5	Smad3	Mothers against decapentaplegic homolog 3	3.45603	0.00203997	-0.254144	413450000
O35737	Hnrnph1	Heterogeneous nuclear ribonucleoprotein H;Heterogeneous nuclear ribonucleoprotein H, N-terminally processed	3.92356	0.00088356	-0.255121	18189000000
Q9EPE9	Atp13a1	Manganese-transporting ATPase 13A1	1.10606	0.145947	0.144432	509120000
Q921I9	Exosc4	Exosome complex component RRP41	1.25144	0.11251	-0.129303	507170000
Q8VDS4	Rprd1a	Regulation of nuclear pre-mRNA domain-containing protein 1A	2.93363	0.00540542	-0.256206	286610000
Q91V81-2;Q91V81	Rbm42	RNA-binding protein 42	0.570676	0.384047	-0.199977	505140000
Q8BGB7;Q8BGB7-2	Enoph1	Enolase-phosphatase E1	0.692191	0.309502	0.151544	504800000
Q9D287	Bcas2	Pre-mRNA-splicing factor SPF27	2.93828	0.00537556	-0.256228	1419300000
Q9Z1M0	P2rx7	P2X purinoceptor 7	0.833633	0.239729	-0.0723089	503640000
Q9Z103	Adnp	Activity-dependent neuroprotector homeobox protein	3.48891	0.00191975	-0.257046	1409200000
Q9DC69	Ndufa9	NADH dehydrogenase [ubiquinone] 1 alpha subcomplex subunit 9, mitochondrial	0.796486	0.256151	0.222862	502110000
O54941	Smarce1	SWI/SNF-related matrix-associated actin-dependent regulator of chromatin subfamily E member 1	3.93695	0.000862175	-0.257814	1917100000
Q9CQT1	Mri1	Methylthioribose-1-phosphate isomerase	0.646945	0.335515	0.137917	498190000
Q9QX47-3;Q9QX47;Q9QX47-4	Son	Protein SON	4.14406	0.000592812	-0.258732	2506800000
Q62383	Supt6h	Transcription elongation factor SPT6	3.60955	0.00154738	-0.259869	1764800000
P63154	Crnkl1	Crooked neck-like protein 1	2.56226	0.0105942	-0.260143	402930000
Q3UA37	Qrich1	Glutamine-rich protein 1	1.13923	0.137837	-0.231575	496980000
E9PZM4	Chd2	Chromodomain-helicase-DNA-binding protein 2	2.37716	0.0148889	-0.260554	682240000
Q8BG81	Poldip3	Polymerase delta-interacting protein 3	6.21759	1.63e-05	-0.261187	2007000000
Q3TNH5;Q3TNH5-3;Q3TNH5-2	Fam172a	Protein FAM172A	1.88942	0.0362525	-0.262057	122530000
Q8CG72;Q8CG72-2	Adprhl2	Poly(ADP-ribose) glycohydrolase ARH3	0.65254	0.331921	-0.13643	495160000
Q6P5G6	Ubxn7	UBX domain-containing protein 7	1.66942	0.0535509	-0.23854	494910000
Q8BI84;Q8BI84-3;Q8BI84-2	Mia3	Melanoma inhibitory activity protein 3	0.240605	0.680558	0.0922419	494540000
Q8R4Y8;Q8R4Y8-2	Rttn	Rotatin	0.142834	0.801536	0.372736	493880000
O88545	Cops6	COP9 signalosome complex subunit 6	0.280355	0.638414	0.0661196	492250000
Q91WE2	Fam192a	Protein FAM192A	1.63223	0.0570441	-0.220208	492060000
Q9R1P1	Psmb3	Proteasome subunit beta type-3	3.28245	0.00280577	-0.26311	1046600000
Q9CQ89;Q9CQ89-3	Cuta	Protein CutA	0.342964	0.570629	0.117169	491210000
P28352	Apex1	DNA-(apurinic or apyrimidinic site) lyase;DNA-(apurinic or apyrimidinic site) lyase, mitochondrial	4.15242	0.000584251	-0.263523	13997000000
Q8BWU5	Osgep	Probable tRNA N6-adenosine threonylcarbamoyltransferase	1.02112	0.169589	-0.183777	490040000
Q4VAA2-2;Q4VAA2	Cdv3	Protein CDV3	0.211235	0.714751	0.0681159	487550000
Q61029-3	Tmpo	Lamina-associated polypeptide 2, isoforms beta/delta/epsilon/gamma	1.42298	0.0824113	-0.533707	486710000
Q9JLI6;Q9JLI6-2	Scly	Selenocysteine lyase	1.85663	0.0381829	-0.263657	617940000
Q9JHG7	Pik3cg	Phosphatidylinositol 4,5-bisphosphate 3-kinase catalytic subunit gamma isoform	0.788973	0.259325	0.12407	486210000
Q9DAK3	Rhobtb1	Rho-related BTB domain-containing protein 1	0.574201	0.382492	-1.06828	486070000
Q5DTM8;Q5DTM8-2	Rnf20	E3 ubiquitin-protein ligase BRE1A	4.35471	0.000408971	-0.265187	1133200000
P47941	Crkl	Crk-like protein	0.558896	0.392223	-0.0769717	485430000
O70404	Vamp8	Vesicle-associated membrane protein 8	0.530599	0.410853	0.584096	484470000
Q08024;Q08024-4;Q08024-3	Cbfb	Core-binding factor subunit beta	0.156176	0.784409	-0.0354277	483470000
Q9Z1N5	Ddx39b	Spliceosome RNA helicase Ddx39b	3.51935	0.0018111	-0.265419	16207000000
Q9CWW6	Pin4	Peptidyl-prolyl cis-trans isomerase NIMA-interacting 4	0.209269	0.71587	-0.0869376	482250000
G5E870	Trip12	E3 ubiquitin-protein ligase TRIP12	2.42802	0.0135851	-0.265828	1234000000
A2ASS6;A2ASS6-2	Ttn	Titin	0.49152	0.441509	-0.611706	481130000
Q8K183	Pdxk	Pyridoxal kinase	1.42052	0.0826736	-0.191417	481110000
Q61210;Q61210-4;Q61210-3;Q61210-2;Q61210-5	Arhgef1	Rho guanine nucleotide exchange factor 1	1.28729	0.105213	0.131812	481080000
Q9CRA8	Exosc5	Exosome complex component RRP46	1.41039	0.0843126	-0.240801	480950000
Q9Z1M8	Ik	Protein Red	4.49636	0.000318622	-0.26599	2075700000
O08599;O08599-2	Stxbp1	Syntaxin-binding protein 1	0.0787222	0.888587	-0.026424	478760000
Q9QXK7	Cpsf3	Cleavage and polyadenylation specificity factor subunit 3	1.77209	0.0446511	-0.266041	599160000
Q80YR5	Safb2	Scaffold attachment factor B2	4.06664	0.00068757	-0.266295	1864800000
P61087	Ube2k	Ubiquitin-conjugating enzyme E2 K	1.17418	0.129907	0.278186	476580000
Q7TPD0;Q7TPD0-2	Ints3	Integrator complex subunit 3	2.48654	0.0121999	-0.266812	447820000
Q7TMY4;Q7TMY4-2	Thoc7	THO complex subunit 7 homolog	1.08336	0.152089	-0.122831	474650000
Q921F2	Tardbp	TAR DNA-binding protein 43	3.9867	0.000788725	-0.267057	17421000000
P61961	Ufm1	Ubiquitin-fold modifier 1	1.44491	0.0790867	0.285587	474210000
Q7TMY8-3;Q7TMY8;Q7TMY8-4;Q7TMY8-2	Huwe1	E3 ubiquitin-protein ligase HUWE1	0.450806	0.473326	0.0833783	473850000
Q8BTS4	Nup54	Nuclear pore complex protein Nup54	2.41821	0.013807	-0.267362	519480000
Q8BZN6-4;Q8BZN6;Q8BZN6-2;Q8BZN6-3	Dock10	Dedicator of cytokinesis protein 10	0.017375	0.973017	0.00409399	470700000
P70288	Hdac2	Histone deacetylase 2	3.089	0.00406882	-0.268072	2061300000
Q9DBR0	Akap8	A-kinase anchor protein 8	2.68968	0.00840891	-0.268078	1809500000
P61965	Wdr5	WD repeat-containing protein 5	3.98584	0.000788725	-0.268473	1922300000
Q6PDM2;Q6PDM2-3;Q6PDM2-2	Srsf1	Serine/arginine-rich splicing factor 1	4.3456	0.00041445	-0.268582	15309000000
Q80U93	Nup214	Nuclear pore complex protein Nup214	5.9198	2.6e-05	-0.268892	2047500000
P0CG14	Chtf8	Chromosome transmission fidelity protein 8 homolog isoform 2	1.45431	0.0778798	-0.236297	465770000
Q99NB9	Sf3b1	Splicing factor 3B subunit 1	5.54998	4.92e-05	-0.269144	7655800000
Q9ER69;Q9ER69-2	Wtap	Pre-mRNA-splicing regulator WTAP	1.99911	0.0295997	-0.269324	525560000
Q9EPL8	Ipo7	Importin-7	0.213186	0.712486	0.0633037	465300000
Q9Z2D8-2;Q9Z2D8	Mbd3	Methyl-CpG-binding domain protein 3	1.9582	0.0318045	-0.269782	582440000
P70271	Pdlim4	PDZ and LIM domain protein 4	0.48875	0.443518	0.116263	464420000
P62827;Q61820	Ran	GTP-binding nuclear protein Ran	4.96447	0.000142294	-0.26984	14704000000
Q8K284;Q8K284-2;Q8K284-3	Gtf3c1	General transcription factor 3C polypeptide 1	0.356383	0.558039	-0.107067	462240000
Q80X41-5;Q80X41-3;Q80X41;Q80X41-2	Vrk1	Serine/threonine-protein kinase VRK1	5.56446	4.8e-05	-0.270404	4265600000
Q810A7;Q810A7-2	Ddx42	ATP-dependent RNA helicase DDX42	6.03669	2.13e-05	-0.270692	2319400000
Q0VBL3-2;Q0VBL3	Rbm15		3.3848	0.00229784	-0.271011	810890000
Q6NZB0	Dnajc8	DnaJ homolog subfamily C member 8	4.6822	0.000229115	-0.271241	5647700000
Q9CR80	Fam32a	Protein FAM32A	2.02992	0.0279475	-0.271849	174640000
A2AJI0-2;A2AJI0	Map7d1	MAP7 domain-containing protein 1	0.725452	0.291084	0.188942	460130000
O35309	Nmi	N-myc-interactor	1.60129	0.059926	0.184605	459520000
Q9ERU9	Ranbp2	E3 SUMO-protein ligase RanBP2	6.13064	1.88e-05	-0.272876	6584400000
P70268;P70268-2	Pkn1	Serine/threonine-protein kinase N1	1.64774	0.0555819	0.204441	458780000
P52623	Uck1	Uridine-cytidine kinase 1	2.04489	0.027288	-0.272974	617840000
Q9DBS1	Tmem43	Transmembrane protein 43	0.0716998	0.897996	0.0203947	458480000
Q80XI4	Pip4k2b	Phosphatidylinositol 5-phosphate 4-kinase type-2 beta	0.275042	0.644713	0.0618466	458190000
Q9WTX6	Cul1	Cullin-1	0.34223	0.571188	-0.0766823	458190000
Q61191	Hcfc1	Host cell factor 1;HCF N-terminal chain 1;HCF N-terminal chain 2;HCF N-terminal chain 3;HCF N-terminal chain 4;HCF N-terminal chain 5;HCF N-terminal chain 6;HCF C-terminal chain 1;HCF C-terminal chain 2;HCF C-terminal chain 3;HCF C-terminal chain 4;HCF C-terminal chain 5;HCF C-terminal chain 6	7.55014	1.53e-06	-0.272979	8296000000
P31996-2;P31996	Cd68	Macrosialin	0.44544	0.476862	0.568448	457080000
O35286	Dhx15	Pre-mRNA-splicing factor ATP-dependent RNA helicase DHX15	4.90169	0.000157421	-0.273915	6138800000
Q6P1F6;Q925E7;Q6ZWR4-3;Q6ZWR4;Q6ZWR4-2;Q8BG02	Ppp2r2a	Serine/threonine-protein phosphatase 2A 55 kDa regulatory subunit B alpha isoform	0.58056	0.378038	0.092561	456720000
Q4KML4	Abracl	Costars family protein ABRACL	0.660539	0.327108	-0.312843	456700000
Q80XC2	Trmt61a	tRNA (adenine(58)-N(1))-methyltransferase catalytic subunit TRMT61A	2.49977	0.0119096	-0.274354	513920000
Q9D6Z1	Nop56	Nucleolar protein 56	6.53413	9.64e-06	-0.275093	6262200000
Q8K327	Champ1	Chromosome alignment-maintaining phosphoprotein 1	1.79837	0.0424427	-0.275467	424920000
Q9EP89	Lactb	Serine beta-lactamase-like protein LACTB, mitochondrial	1.13468	0.13899	0.246973	454660000
Q61937	Npm1	Nucleophosmin	4.50302	0.000317366	-0.276493	20504000000
P70399-5;P70399;P70399-6	Tp53bp1	Tumor suppressor p53-binding protein 1	3.80249	0.00109195	-0.277757	1277400000
Q9CR70	Lage3	EKC/KEOPS complex subunit Lage3	0.871599	0.224659	-0.770152	452460000
Q91VL8	Terf2ip	Telomeric repeat-binding factor 2-interacting protein 1	0.685888	0.312676	-0.112819	452040000
Q9CQS8	Sec61b	Protein transport protein Sec61 subunit beta	0.0889645	0.87506	-0.139412	450310000
O35215	Ddt	D-dopachrome decarboxylase	1.40691	0.0847743	-0.280643	450190000
P07310	Ckm	Creatine kinase M-type	0.441045	0.480805	0.483875	450020000
Q8C1D8;Q8C1D8-2	Iws1	Protein IWS1 homolog	2.29157	0.0173971	-0.27911	569460000
Q8CFQ3	Aqr	Intron-binding protein aquarius	0.869997	0.225169	-0.123826	449280000
Q9D1E6	Tbcb	Tubulin-folding cofactor B	0.0730676	0.895683	-0.0239247	448840000
Q4FK66;Q4FK66-2	Prpf38a	Pre-mRNA-splicing factor 38A	0.668694	0.322254	-0.311194	448330000
P09405	Ncl	Nucleolin	5.8238	3.06e-05	-0.279297	54542000000
Q3TKT4;Q3TKT4-2	Smarca4	Transcription activator BRG1	3.8148	0.00107512	-0.279914	1050700000
P97452	Bop1	Ribosome biogenesis protein BOP1	0.4468	0.476268	-0.127884	447080000
Q8CJG1;Q8CJF8-2;Q8CJF8	Ago1	Protein argonaute-1	1.70068	0.0506927	0.165936	446060000
P49586	Pcyt1a	Choline-phosphate cytidylyltransferase A	0.794259	0.256884	-0.136204	445780000
P28574-2;P28574	Max	Protein max	1.56506	0.063975	-0.202055	445580000
P35235;P35235-2	Ptpn11	Tyrosine-protein phosphatase non-receptor type 11	0.011954	0.980097	-0.00306829	445400000
Q9QZQ8	H2afy	Core histone macro-H2A.1	0.886495	0.217807	-1.44047	445280000
P70388;P70388-2;P70388-4;P70388-3	Rad50	DNA repair protein RAD50	2.47627	0.0123998	-0.279983	1036500000
Q91VU7;Q91VU7-2	Pus7		1.45821	0.0774981	-0.271105	444190000
Q8CGA0	Ppm1f	Protein phosphatase 1F	0.0942242	0.866637	0.039853	443620000
P70295	Aup1	Ancient ubiquitous protein 1	0.351198	0.563123	0.0740693	443540000
Q9JIX0	Eny2	Transcription and mRNA export factor ENY2	0.0239136	0.964932	0.00728305	442250000
O08810	Eftud2	116 kDa U5 small nuclear ribonucleoprotein component	4.17249	0.000564498	-0.280107	6367400000
Q9R0G7;Q64318	Zeb2	Zinc finger E-box-binding homeobox 2	3.58161	0.00161302	-0.280191	1643500000
Q7TQH0-2;Q7TQH0-3;Q7TQH0	Atxn2l	Ataxin-2-like protein	1.64556	0.0558232	0.282964	440210000
P13707	Gpd1	Glycerol-3-phosphate dehydrogenase [NAD(+)], cytoplasmic	0.866233	0.226344	0.228463	440180000
P17225	Ptbp1	Polypyrimidine tract-binding protein 1	3.21672	0.00317237	-0.280504	16031000000
Q9CWU9	Nup37	Nucleoporin Nup37	1.92812	0.0336444	-0.280988	454720000
Q8BML9	Qars		1.55497	0.0652117	0.276508	438810000
P70398	Usp9x	Probable ubiquitin carboxyl-terminal hydrolase FAF-X	1.21579	0.120017	0.225473	437560000
Q99LD4;Q99LD4-2	Gps1	COP9 signalosome complex subunit 1	0.270303	0.649126	-0.0519965	436840000
Q6P4T2	Snrnp200	U5 small nuclear ribonucleoprotein 200 kDa helicase	5.74945	3.38e-05	-0.281101	9158500000
Q505B7-2;Q505B7	Zbtb8os	Protein archease	0.758948	0.274412	-0.234533	435560000
Q8BJS4-2;Q8BJS4;Q8BJS4-3	Sun2	SUN domain-containing protein 2	4.63462	0.000248652	-0.281461	6210600000
P60840-2;P60840;P60840-3	Ensa	Alpha-endosulfine	0.0550712	0.918401	-0.011628	435270000
Q9Z2N8;Q99MR0	Actl6a	Actin-like protein 6A	3.08434	0.0040984	-0.281875	2953500000
Q3TYS2		Uncharacterized protein C17orf62 homolog	0.782594	0.262568	-0.651334	434480000
Q9CPW7	Zmat2	Zinc finger matrin-type protein 2	0.798468	0.255767	-0.178366	433000000
Q8CFE2		UPF0609 protein C4orf27 homolog	1.63341	0.0569294	-0.199335	432620000
Q8BH59	Slc25a12	Calcium-binding mitochondrial carrier protein Aralar1	1.59771	0.0603405	0.223257	432210000
Q5NCR9	Nsrp1	Nuclear speckle splicing regulatory protein 1	1.47383	0.0754434	-0.297304	432040000
Q61411;Q61411-2	Hras	GTPase HRas;GTPase HRas, N-terminally processed	0.275772	0.643966	0.0619304	431310000
Q91WJ8;Q91WJ8-2	Fubp1	Far upstream element-binding protein 1	4.46556	0.000331696	-0.282368	7461500000
Q8JZV7	Amdhd2	Putative N-acetylglucosamine-6-phosphate deacetylase	1.53394	0.0675951	0.174697	430920000
Q9R1Z7	Pts	6-pyruvoyl tetrahydrobiopterin synthase	0.602364	0.363504	0.206646	430910000
Q9ER74;Q8BX22	Sall1	Sal-like protein 1	8.07645	5.69e-07	-0.282656	2791800000
Q9CYN2	Spcs2	Signal peptidase complex subunit 2	0.343848	0.569875	-0.0748259	429840000
P97825	Hn1	Hematological and neurological expressed 1 protein;Hematological and neurological expressed 1 protein, N-terminally processed	0.433019	0.487205	0.0883496	429460000
P59235	Nup43	Nucleoporin Nup43	1.86038	0.0379729	-0.282801	358840000
P10649;Q80W21;P15626;O35660	Gstm1	Glutathione S-transferase Mu 1	1.14334	0.13676	0.156431	428840000
Q640M1;Q640M1-2	Utp14a	U3 small nucleolar RNA-associated protein 14 homolog A	2.87243	0.00607354	-0.282823	231260000
Q6ZWY8	Tmsb10	Thymosin beta-10	1.03202	0.166225	-0.679956	428180000
Q99NB8	Ubqln4	Ubiquilin-4	0.272684	0.647332	-0.0686345	427980000
Q9CXW3	Cacybp	Calcyclin-binding protein	0.670994	0.321001	-0.119909	427720000
Q8BHG2;Q8BHG2-3;Q8BHG2-2		UPF0587 protein C1orf123 homolog	0.115897	0.83671	-0.0282051	427690000
Q6PHN9	Rab35	Ras-related protein Rab-35	1.19872	0.124066	0.114823	426960000
Q6DID3	Scaf8	Protein SCAF8	2.09289	0.0250692	-0.283125	344320000
Q8K274	Fn3krp	Ketosamine-3-kinase	1.60923	0.0592421	0.251901	425880000
Q6ZQ88	Kdm1a	Lysine-specific histone demethylase 1A	4.29481	0.000449483	-0.284137	578150000
Q5DU09;Q5DU09-2	Znf652	Zinc finger protein 652	1.27809	0.106724	-0.221283	424990000
Q9D903	Ebna1bp2	Probable rRNA-processing protein EBP2	2.73151	0.00781007	-0.284257	575530000
Q9R0L7	Akap8l	A-kinase anchor protein 8-like	0.597157	0.366829	-0.0888041	424460000
O35326	Srsf5	Serine/arginine-rich splicing factor 5	2.4157	0.0138615	-0.284812	3176200000
Q9CRB2	Nhp2	H/ACA ribonucleoprotein complex subunit 2	2.44848	0.0130406	-0.284814	1222300000
Q62203	Sf3a2	Splicing factor 3A subunit 2	4.15734	0.000579028	-0.285233	2891400000
Q60875-5;Q60875-4;Q60875;Q60875-3;Q60875-2	Arhgef2	Rho guanine nucleotide exchange factor 2	1.11898	0.142573	0.226489	421520000
Q9D6T0;Q9D6T0-2	Nosip	Nitric oxide synthase-interacting protein	0.34718	0.566728	-0.056697	420470000
Q91VN6	Ddx41	Probable ATP-dependent RNA helicase DDX41	1.66748	0.0537528	-0.175314	419800000
P47757	Capzb	F-actin-capping protein subunit beta	1.13142	0.139587	0.339249	419710000
Q8CH25-2;Q8CH25	Sltm	SAFB-like transcription modulator	2.65932	0.00891378	-0.285473	2034200000
O08759-3;O08759-2;O08759	Ube3a	Ubiquitin-protein ligase E3A	0.815457	0.248249	-0.662499	418420000
Q9CPP6	Ndufa5	NADH dehydrogenase [ubiquinone] 1 alpha subcomplex subunit 5	0.328816	0.585411	0.0941527	417800000
Q64511	Top2b	DNA topoisomerase 2-beta	2.85366	0.00625339	-0.285604	2714300000
Q9Z2B9	Rps6ka4	Ribosomal protein S6 kinase alpha-4	5.35494	6.95e-05	-0.285854	943730000
Q9D6F9	Tubb4a	Tubulin beta-4A chain	1.31612	0.100252	-0.909522	416720000
Q9WVA3	Bub3	Mitotic checkpoint protein BUB3	3.51668	0.00181681	-0.286193	3661700000
Q64010;Q64010-2	Crk	Adapter molecule crk	0.101701	0.8555	-0.0211054	415710000
Q8CH18;Q8CH18-3;Q8CH18-2	Ccar1	Cell division cycle and apoptosis regulator protein 1	4.77461	0.000195594	-0.287002	4771200000
Q8K2X3	Obfc1	CST complex subunit STN1	0.78462	0.261582	-0.584107	415170000
Q9EPV8	Ubl5	Ubiquitin-like protein 5	0.845101	0.235336	-0.188963	414810000
Q9DCH4	Eif3f	Eukaryotic translation initiation factor 3 subunit F	1.62851	0.0574945	0.474603	414550000
Q6NZF1	Zc3h11a	Zinc finger CCCH domain-containing protein 11A	2.4578	0.0128572	-0.287834	1305400000
O88738-3;O88738-2;O88738	Birc6	Baculoviral IAP repeat-containing protein 6	0.0604913	0.912676	-0.158736	413570000
Q6A068	Cdc5l	Cell division cycle 5-like protein	3.6113	0.00154415	-0.287903	4639500000
Q9Z0W3;Q9Z0W3-2	Nup160	Nuclear pore complex protein Nup160	0.866585	0.226344	-0.099996	412100000
A2BH40;A2BH40-3;A2BH40-4;A2BH40-2	Arid1a	AT-rich interactive domain-containing protein 1A	5.22945	8.81e-05	-0.287924	2761700000
E9Q7E2	Arid2		0.398467	0.518047	-0.143708	411870000
P00920	Ca2	Carbonic anhydrase 2	1.45456	0.0778798	-0.335781	411740000
Q8CHY6	Gatad2a	Transcriptional repressor p66 alpha	3.6361	0.00147695	-0.288299	789270000
Q91XQ0;Q91XQ0-2	Dnah8	Dynein heavy chain 8, axonemal	0.0457682	0.929766	0.0770974	411250000
P63271;Q9Z199	Supt4h1a;Supt4h1b	Transcription elongation factor SPT4-A;Transcription elongation factor SPT4-B	0.902129	0.212225	-0.173099	410830000
F6ZDS4	Tpr	Nucleoprotein TPR	7.81348	9.51e-07	-0.289433	14650000000
Q9DAS9	Gng12	Guanine nucleotide-binding protein G(I)/G(S)/G(O) subunit gamma-12	1.20204	0.123329	-0.202234	410540000
O35691	Pnn	Pinin	2.37288	0.014979	-0.290164	2827700000
Q9QWV9	Ccnt1	Cyclin-T1	2.06652	0.0262003	-0.290357	179430000
Q9CXR1	Dhrs7	Dehydrogenase/reductase SDR family member 7	0.206575	0.718672	-0.03389	409650000
P56960	Exosc10	Exosome component 10	3.91982	0.000889347	-0.290394	1295800000
P84102;O88892	Serf2;Serf1	Small EDRK-rich factor 2;Small EDRK-rich factor 1	0.371129	0.543514	-0.130563	406750000
Q8R5C8	Zmynd11	Zinc finger MYND domain-containing protein 11	1.79955	0.0423595	-0.290433	377520000
Q5DTY9	Kctd16	BTB/POZ domain-containing protein KCTD16	0.561757	0.390252	0.468686	405020000
Q61069	Usf1	Upstream stimulatory factor 1	1.41437	0.0836985	-0.231136	404450000
Q9D0W5	Ppil1	Peptidyl-prolyl cis-trans isomerase-like 1	2.09372	0.0250434	-0.290544	1022500000
Q923G2	Polr2h	DNA-directed RNA polymerases I, II, and III subunit RPABC3	0.246548	0.674495	-0.0964929	403360000
Q9WVA4;Q9R1Q8	Tagln2	Transgelin-2	3.46248	0.00201653	-0.290978	3061000000
Q9Z277;Q9Z277-2	Baz1b	Tyrosine-protein kinase BAZ1B	5.65027	4.07e-05	-0.2912	2556000000
Q8BX09;Q8BX09-2	Rbbp5	Retinoblastoma-binding protein 5	0.448367	0.475271	-0.120385	402450000
Q8C147;Q8C147-2	Dock8	Dedicator of cytokinesis protein 8	0.0330409	0.947976	-0.0118455	401270000
Q9CY97;Q9CY97-2	Ssu72	RNA polymerase II subunit A C-terminal domain phosphatase SSU72	0.444586	0.477619	-0.124291	401200000
Q6ZQK5;Q6ZQK5-2	Acap2	Arf-GAP with coiled-coil, ANK repeat and PH domain-containing protein 2	1.55369	0.0653605	0.242997	399970000
Q8CGF7-2;Q8CGF7;Q8CGF7-3;Q3B807-3;Q3B807	Tcerg1	Transcription elongation regulator 1	5.05071	0.000123071	-0.291813	3199300000
Q65Z40	Wapal	Wings apart-like protein homolog	4.8539	0.000170259	-0.292203	888530000
E9Q4N7	Arid1b		1.38254	0.0884295	-0.253547	399790000
B2RWS6	Ep300	Histone acetyltransferase p300	3.56005	0.00167598	-0.29305	730400000
Q5SFM8;Q5SFM8-2;Q5SFM8-3	Rbm27	RNA-binding protein 27	1.07794	0.153599	-0.191666	398880000
Q91YT7	Ythdf2	YTH domain-containing family protein 2	0.689261	0.31124	-0.120011	398690000
Q9QYI3	Dnajc7	DnaJ homolog subfamily C member 7	0.231571	0.690935	0.0376669	397940000
P28659-2;P28659-3;P28659;P28659-4	Celf1	CUGBP Elav-like family member 1	1.11707	0.14305	-0.331995	396640000
Q91WA4	Cxxc5	CXXC-type zinc finger protein 5	0.97628	0.184132	-0.172331	396530000
Q9ES97-2;Q9ES97;Q9ES97-3;Q9ES97-4;Q9ES97-5	Rtn3	Reticulon-3	0.745832	0.281193	0.212796	396120000
Q99KH8	Stk24	Serine/threonine-protein kinase 24;Serine/threonine-protein kinase 24 35 kDa subunit;Serine/threonine-protein kinase 24 12 kDa subunit	1.50786	0.0710716	0.243377	395770000
Q921M3;Q921M3-2	Sf3b3	Splicing factor 3B subunit 3	4.52182	0.000306193	-0.293795	5855200000
Q8BZX4-2;Q8BZX4	Srek1	Splicing regulatory glutamine/lysine-rich protein 1	1.68043	0.0525084	-0.293943	394900000
Q3TMH2	Scrn3	Secernin-3	0.146978	0.796229	-0.0289834	394170000
Q569Z5;Q569Z5-2	Ddx46	Probable ATP-dependent RNA helicase DDX46	7.07905	3.56e-06	-0.294078	3784900000
Q3TIX9	Usp39	U4/U6.U5 tri-snRNP-associated protein 2	4.56393	0.000283621	-0.294325	793130000
B1AZI6	Thoc2	THO complex subunit 2	3.82227	0.00106395	-0.29446	1077400000
Q922K7	Nop2	Probable 28S rRNA (cytosine-C(5))-methyltransferase	3.21141	0.00320665	-0.294674	604930000
Q09XV5;Q09XV5-2	Chd8	Chromodomain-helicase-DNA-binding protein 8	2.08519	0.0254276	-0.294697	318660000
O09000	Ncoa3	Nuclear receptor coactivator 3	1.68074	0.0525084	-0.463504	391590000
Q9JI46;P0C028;P0C027;Q8R2U6	Nudt3	Diphosphoinositol polyphosphate phosphohydrolase 1	0.233001	0.689816	-0.0552921	391500000
Q9R0N0	Galk1	Galactokinase	1.08458	0.151904	0.337547	390400000
O55126	Gbas	Protein NipSnap homolog 2	0.75523	0.276525	0.185598	389940000
P46978	Stt3a	Dolichyl-diphosphooligosaccharide--protein glycosyltransferase subunit STT3A	0.290813	0.626468	0.0725617	389070000
Q80TP3	Ubr5	E3 ubiquitin-protein ligase UBR5	2.38108	0.0147847	-0.294901	255930000
Q9D2H6-2;Q9D2H6	Sp2	Transcription factor Sp2	1.48251	0.0742443	-0.258393	388690000
Q9CQC7	Ndufb4	NADH dehydrogenase [ubiquinone] 1 beta subcomplex subunit 4	0.9074	0.209866	0.20822	388210000
Q921F4;Q921F4-4;Q921F4-5	Hnrnpll	Heterogeneous nuclear ribonucleoprotein L-like	5.09393	0.000114559	-0.294925	4107700000
Q8CI95;S4R1M9	Osbpl11	Oxysterol-binding protein-related protein 11	0.922587	0.20383	0.174189	387770000
Q60787	Lcp2	Lymphocyte cytosolic protein 2	0.447228	0.475978	-0.0803151	386950000
O70378	Emc8	ER membrane protein complex subunit 8	0.310753	0.602957	0.0690002	386930000
Q7JJ13;Q7JJ13-2	Brd2	Bromodomain-containing protein 2	2.73784	0.00775257	-0.295286	688020000
Q80UM3;Q9DBB4	Naa15	N-alpha-acetyltransferase 15, NatA auxiliary subunit	1.67192	0.0533567	0.375343	384930000
Q6Q899;Q6Q899-2;Q6Q899-3;Q6Q899-4	Ddx58	Probable ATP-dependent RNA helicase DDX58	0.384726	0.530217	0.0823592	384750000
Q9CQ80;Q9CQ80-2	Vps25	Vacuolar protein-sorting-associated protein 25	0.237871	0.683289	-0.0641439	384420000
Q61656	Ddx5	Probable ATP-dependent RNA helicase DDX5	6.89054	4.83e-06	-0.295797	23997000000
Q921W0	Chmp1a	Charged multivesicular body protein 1a	0.0494992	0.925064	-0.0185624	384200000
P61979-2;P61979	Hnrnpk	Heterogeneous nuclear ribonucleoprotein K	8.51434	2.25e-07	-0.297733	60973000000
P97302	Bach1	Transcription regulator protein BACH1	0.0326948	0.948182	-0.0080813	383950000
Q8VCM8	Ncln	Nicalin	1.35144	0.0936336	0.208637	383470000
O70133-2;O70133;O70133-3	Dhx9	ATP-dependent RNA helicase A	5.00036	0.000133956	-0.298106	15758000000
P54729	Nub1	NEDD8 ultimate buster 1	0.0716867	0.897996	0.0177448	382710000
Q60710	Samhd1	Deoxynucleoside triphosphate triphosphohydrolase SAMHD1	3.98599	0.000788725	-0.29816	12615000000
Q8VDG3	Parn	Poly(A)-specific ribonuclease PARN	1.29234	0.104203	-0.204486	380570000
Q69ZA1;Q69ZA1-2	Cdk13	Cyclin-dependent kinase 13	2.56046	0.0106169	-0.298486	599540000
Q1HFZ0;Q1HFZ0-2	Nsun2	tRNA (cytosine(34)-C(5))-methyltransferase	4.60021	0.000266021	-0.29855	1743500000
P53811	Pitpnb	Phosphatidylinositol transfer protein beta isoform	0.207948	0.717109	-0.37921	379300000
D3YXK2	Safb	Scaffold attachment factor B1	3.87327	0.000963702	-0.298664	4162400000
Q9CY57-5;Q9CY57-4;Q9CY57-3;Q9CY57-2;Q9CY57	Chtop	Chromatin target of PRMT1 protein	4.09764	0.000646075	-0.299379	2083500000
P05480;P39688-2;P39688;Q04736;P06240	Src;Fyn;Yes1	Neuronal proto-oncogene tyrosine-protein kinase Src;Tyrosine-protein kinase Fyn;Tyrosine-protein kinase Yes	0.206323	0.718853	-0.515038	376500000
Q9WV03;Q9WTJ8	Fam50a	Protein FAM50A	1.84564	0.0389795	-0.299493	595560000
Q61624	Znf148	Zinc finger protein 148	3.60786	0.00154738	-0.29983	335540000
O88796	Rpp30	Ribonuclease P protein subunit p30	1.91847	0.0342893	-0.30054	81101000
Q99J36	Thumpd1	THUMP domain-containing protein 1	4.55953	0.000285184	-0.300784	840690000
Q80YV3	Trrap	Transformation/transcription domain-associated protein	1.98331	0.0304671	-0.301346	162640000
P43274	Hist1h1e	Histone H1.4	2.35729	0.0154305	-0.301432	223510000000
Q8BTZ7	Gmppb	Mannose-1-phosphate guanyltransferase beta	1.70774	0.05024	0.182519	374000000
Q8VEE0	Rpe	Ribulose-phosphate 3-epimerase	0.760191	0.273763	0.259736	373330000
Q7TNC4-4;Q7TNC4;Q7TNC4-2;Q7TNC4-3	Luc7l2	Putative RNA-binding protein Luc7-like 2	3.38468	0.00229784	-0.301526	6708200000
P63094-2;P63094;Q6R0H7-4;Q6R0H7;P63094-3;Q8CGK7	Gnas	Guanine nucleotide-binding protein G(s) subunit alpha isoforms short;Guanine nucleotide-binding protein G(s) subunit alpha isoforms XLas	0.626056	0.348732	0.142133	371170000
Q9CPP0	Npm3	Nucleoplasmin-3	1.16106	0.132796	-0.3037	370840000
Q6IRU5-2;Q6IRU5;Q6IRU5-3	Cltb	Clathrin light chain B	1.44389	0.0792237	0.214822	370400000
Q8BGS2;Q8BGS2-2	Bola2	BolA-like protein 2	0.434132	0.486323	-0.09535	370290000
Q2VPQ9;Q2VPQ9-2	Meaf6	Chromatin modification-related protein MEAF6	1.1331	0.13927	-0.289004	370230000
Q9CR98	Fam136a	Protein FAM136A	1.05111	0.16046	0.865854	370180000
Q9D820	Prorsd1	Prolyl-tRNA synthetase associated domain-containing protein 1	0.12968	0.817409	0.0340047	370080000
Q9D7M8	Polr2d	DNA-directed RNA polymerase II subunit RPB4	0.319366	0.595279	-0.0661232	369900000
Q3TXT3;Q3TXT3-2	Inip	SOSS complex subunit C	0.11085	0.843355	0.119299	369810000
Q8R3Y8-2;Q8R3Y8	Irf2bp1	Interferon regulatory factor 2-binding protein 1	1.06555	0.156656	-0.152892	369780000
P47758	Srprb	Signal recognition particle receptor subunit beta	0.6809	0.315474	-0.164447	369040000
O08915	Aip	AH receptor-interacting protein	0.0708021	0.899557	-0.0185346	368700000
Q07813	Bax	Apoptosis regulator BAX	1.65048	0.0553332	0.281502	368020000
Q9D0M0	Exosc7	Exosome complex exonuclease RRP42	0.538636	0.406093	-0.0957727	367140000
Q9QVP9;P34152-6;P34152-5;P34152;P34152-4;P34152-2	Ptk2b	Protein-tyrosine kinase 2-beta	0.571288	0.383973	0.104853	367020000
P23198	Cbx3	Chromobox protein homolog 3	5.11178	0.0001126	-0.301706	12917000000
P70404	Idh3g	Isocitrate dehydrogenase [NAD] subunit gamma 1, mitochondrial	0.664613	0.324743	0.0756831	365370000
Q5SUQ9-2;Q5SUQ9;Q5SUQ9-3	Ctc1	CST complex subunit CTC1	1.00477	0.174423	-0.159157	365260000
Q99L13	Hibadh	3-hydroxyisobutyrate dehydrogenase, mitochondrial	1.61168	0.0591432	0.229047	364680000
Q9D0L8;Q9D0L8-3;Q9D0L8-2	Rnmt	mRNA cap guanine-N7 methyltransferase	3.87901	0.000956889	-0.301879	1531100000
Q9CX99	Grap	GRB2-related adapter protein	0.865891	0.226344	-0.128819	363990000
Q9JIW9	Ralb	Ras-related protein Ral-B	0.50226	0.43274	0.128186	363890000
Q80W00;Q80W00-2	Ppp1r10	Serine/threonine-protein phosphatase 1 regulatory subunit 10	1.67388	0.053155	-0.304358	363730000
E9Q6J5-2;E9Q6J5;E9Q6J5-3;Q5SQY2	Bod1l		3.23194	0.00309055	-0.302348	828530000
Q9DCT1	Akr1e2	1,5-anhydro-D-fructose reductase	0.346873	0.566728	-0.0650513	362140000
Q9CSU0;Q9CSU0-2;Q9CSU0-3	Rprd1b	Regulation of nuclear pre-mRNA domain-containing protein 1B	2.69236	0.00838457	-0.302731	1775200000
Q8VE80	Thoc3	THO complex subunit 3	1.24081	0.114775	-0.211202	360630000
Q8R409	Hexim1	Protein HEXIM1	0.222195	0.702073	-0.315756	360570000
Q3UPF5-2;Q3UPF5	Zc3hav1	Zinc finger CCCH-type antiviral protein 1	1.12107	0.14204	0.213784	359600000
E9Q7G0	Numa1		6.15163	1.84e-05	-0.303121	33672000000
P14094	Atp1b1	Sodium/potassium-transporting ATPase subunit beta-1	0.182166	0.749168	-0.0766047	359310000
Q8CFI7	Polr2b	DNA-directed RNA polymerase II subunit RPB2	6.10183	1.91e-05	-0.303235	2675700000
Q99LC2	Cstf1	Cleavage stimulation factor subunit 1	2.44542	0.0131055	-0.303837	989330000
Q501J6;Q501J6-2	Ddx17	Probable ATP-dependent RNA helicase DDX17	6.97819	4.21e-06	-0.304023	8758700000
Q99LH1	Gnl2	Nucleolar GTP-binding protein 2	0.199727	0.725811	-0.0779572	355770000
Q64705;Q64705-2	Usf2	Upstream stimulatory factor 2	0.814867	0.248359	-0.233059	355700000
Q62280	Ss18	Protein SSXT	0.140338	0.804126	-0.0490338	355680000
Q6PIE5;Q9Z1W8	Atp1a2	Sodium/potassium-transporting ATPase subunit alpha-2	0.66006	0.327151	0.174108	354490000
Q3TKY6	Cwc27	Peptidyl-prolyl cis-trans isomerase CWC27 homolog	0.927972	0.20183	-0.193716	354270000
Q5SVQ0-4;Q5SVQ0-2;Q5SVQ0-3;Q5SVQ0;Q5SVQ0-5	Kat7	Histone acetyltransferase KAT7	1.53251	0.0677732	-0.297486	354130000
P62075	Timm13	Mitochondrial import inner membrane translocase subunit Tim13	1.47316	0.075473	0.233509	354110000
Q8R0G9	Nup133	Nuclear pore complex protein Nup133	3.56388	0.0016657	-0.30414	1218400000
Q9DB34	Chmp2a	Charged multivesicular body protein 2a	0.423853	0.494451	-0.146624	353080000
P32067	Ssb	Lupus La protein homolog	3.64844	0.00144342	-0.30431	11341000000
Q6PFD9	Nup98	Nuclear pore complex protein Nup98-Nup96;Nuclear pore complex protein Nup98;Nuclear pore complex protein Nup96	3.60741	0.00154738	-0.304546	2406400000
Q9WUP7	Uchl5	Ubiquitin carboxyl-terminal hydrolase isozyme L5	0.445529	0.476862	0.110772	350860000
Q99PV0	Prpf8	Pre-mRNA-processing-splicing factor 8	7.07676	3.56e-06	-0.305048	8473300000
Q62376;Q62376-2	Snrnp70	U1 small nuclear ribonucleoprotein 70 kDa	5.62693	4.27e-05	-0.30535	6738800000
Q9D3U0	Pus10	Putative tRNA pseudouridine synthase Pus10	0.862647	0.227505	-0.214046	350000000
Q9CSN1	Snw1	SNW domain-containing protein 1	4.71434	0.00021753	-0.30538	3888400000
P43247	Msh2	DNA mismatch repair protein Msh2	2.80081	0.00686282	-0.30541	345000000
Q9CWX9	Ddx47	Probable ATP-dependent RNA helicase DDX47	2.03744	0.0275845	-0.305663	124870000
P54923	Adprh	[Protein ADP-ribosylarginine] hydrolase	0.408965	0.507916	-0.0830912	348920000
Q00420-3;Q00420;Q00420-4;Q00420-2	Gabpb1	GA-binding protein subunit beta-1	0.748311	0.28009	-0.211817	348660000
P41216	Acsl1	Long-chain-fatty-acid--CoA ligase 1	1.6099	0.0591923	0.238451	348370000
Q9CZE3	Rab32	Ras-related protein Rab-32	0.34362	0.569971	0.0866108	348060000
P53568	Cebpg	CCAAT/enhancer-binding protein gamma	0.328772	0.585411	-0.156446	347530000
Q60749;Q9WU01-2;Q9WU01	Khdrbs1	KH domain-containing, RNA-binding, signal transduction-associated protein 1	2.73615	0.00775819	-0.306028	6719500000
Q99PL6;Q99PL6-2	Ubxn6	UBX domain-containing protein 6	0.900327	0.212536	-0.178596	347410000
O35654	Pold2	DNA polymerase delta subunit 2	2.63293	0.00929009	-0.306297	234940000
O35143	Atpif1	ATPase inhibitor, mitochondrial	0.0429595	0.934321	0.0542445	346200000
Q923D4	Sf3b5	Splicing factor 3B subunit 5	2.19969	0.0205819	-0.306311	2087700000
P48999	Alox5	Arachidonate 5-lipoxygenase	1.97449	0.0308615	-0.306621	1654700000
O08784	Tcof1	Treacle protein	3.71657	0.0012805	-0.306948	9819100000
Q9DAA6;Q9DAA6-2	Exosc1	Exosome complex component CSL4	3.60133	0.00156048	-0.306976	382310000
P56477	Irf5	Interferon regulatory factor 5	0.237857	0.683289	-0.039498	343670000
Q8BHJ9	Slu7	Pre-mRNA-splicing factor SLU7	1.77569	0.0444497	-0.306997	174740000
Q497V5	Srbd1	S1 RNA-binding domain-containing protein 1	1.2644	0.109766	-0.362571	341690000
P11798;P11798-2	Camk2a	Calcium/calmodulin-dependent protein kinase type II subunit alpha	0.352814	0.561434	0.147908	341260000
P60202;P60202-2	Plp1	Myelin proteolipid protein	0.0317282	0.950019	-0.0676874	341090000
Q9Z315	Sart1	U4/U6.U5 tri-snRNP-associated protein 1	7.20302	2.95e-06	-0.30717	3054800000
Q91YW3	Dnajc3	DnaJ homolog subfamily C member 3	1.0581	0.158795	0.273682	339220000
Q8R5F3	Oard1	O-acetyl-ADP-ribose deacetylase 1	0.232229	0.690478	0.0630157	338880000
Q8C3R1;Q8C3R1-2	Brat1	BRCA1-associated ATM activator 1	0.0416319	0.935103	-0.0757593	338580000
P24788;P24788-2	Cdk11b	Cyclin-dependent kinase 11B	0.897385	0.21353	-0.175876	337950000
Q80X32		UPF0461 protein C5orf24 homolog	1.48169	0.0743356	-0.45281	337770000
P40201	Chd1	Chromodomain-helicase-DNA-binding protein 1	1.543	0.0665042	-0.634175	337730000
P01837		Ig kappa chain C region	1.02744	0.167646	-0.841223	337730000
Q80YV2;Q80YV2-2	Zc3hc1	Nuclear-interacting partner of ALK	1.61673	0.0587144	-0.225017	337670000
Q9Z1K5	Arih1	E3 ubiquitin-protein ligase ARIH1	1.01986	0.169913	0.184641	337200000
Q923D5	Wbp11	WW domain-binding protein 11	3.20874	0.00322161	-0.30727	1283200000
Q7TMI3;Q7TMI3-2;Q7TMI3-3	Uhrf2	E3 ubiquitin-protein ligase UHRF2	2.24891	0.0188542	-0.307461	143040000
Q922Q4;Q922W5	Pycr2	Pyrroline-5-carboxylate reductase 2	1.14088	0.137387	0.198721	335690000
Q08943;Q08943-2	Ssrp1	FACT complex subunit SSRP1	4.5892	0.00027193	-0.307658	1354200000
Q8VBT0	Tmx1	Thioredoxin-related transmembrane protein 1	0.104333	0.852216	0.0350834	335160000
P49962	Srp9	Signal recognition particle 9 kDa protein	0.171652	0.762352	0.0542765	334970000
Q9JMD0-4;Q9JMD0-3;Q9JMD0-2;Q9JMD0	Znf207	BUB3-interacting and GLEBS motif-containing protein ZNF207	2.66024	0.00891162	-0.307681	1831600000
P27641	Xrcc5	X-ray repair cross-complementing protein 5	0.325257	0.589335	-0.0752688	333900000
Q8BTI8;Q8BTI8-3;Q8BTI8-2	Srrm2	Serine/arginine repetitive matrix protein 2	4.95745	0.000143224	-0.30859	6746000000
A2A690;A2A690-2	Tanc2	Protein TANC2	0.934219	0.199601	0.204867	333700000
Q920B9	Supt16h	FACT complex subunit SPT16	6.28875	1.47e-05	-0.308691	2771000000
E9PYH6	Setd1a	Histone-lysine N-methyltransferase	2.37422	0.0149597	-0.308906	280060000
P23708-2;P23708	Nfya	Nuclear transcription factor Y subunit alpha	0.600726	0.364727	-0.171187	332560000
P30275;Q6P8J7	Ckmt1	Creatine kinase U-type, mitochondrial	0.174156	0.759653	-0.0425852	332530000
P24547	Impdh2	Inosine-5-monophosphate dehydrogenase 2	0.485785	0.446338	0.0715488	332380000
Q8C827-3;Q8C827;Q8C827-2;Q571J5	Zfp62	Zinc finger protein 62	0.727823	0.290391	-0.189303	331970000
Q8CFN5-2;Q8CFN5-3;Q8CFN5	Mef2c	Myocyte-specific enhancer factor 2C	1.31845	0.0998321	-0.303574	331470000
P62838;P61079	Ube2d2;Ube2d3	Ubiquitin-conjugating enzyme E2 D2;Ubiquitin-conjugating enzyme E2 D3	0.172821	0.761065	-0.149305	331310000
Q8K2F0;Q8K2F0-2	Brd3	Bromodomain-containing protein 3	1.69044	0.0517178	-0.393845	331130000
Q91YR9;REV__Q3TVC7;REV__Q3TVC7-3	Ptgr1	Prostaglandin reductase 1	0.772106	0.268139	-0.0970878	331100000
Q7TMF3	Ndufa12	NADH dehydrogenase [ubiquinone] 1 alpha subcomplex subunit 12	0.972975	0.185173	0.266152	330790000
Q3U0V1	Khsrp	Far upstream element-binding protein 2	5.36351	6.85e-05	-0.310133	16974000000
P61264;O35526;Q00262	Stx1b	Syntaxin-1B	0.615941	0.355542	0.168509	327560000
Q8BK64	Ahsa1	Activator of 90 kDa heat shock protein ATPase homolog 1	0.746256	0.281044	0.152213	326780000
Q9Z2L7;Q9Z2L7-2	Crlf3	Cytokine receptor-like factor 3	0.806077	0.251701	0.221135	326700000
Q8BXZ1	Tmx3	Protein disulfide-isomerase TMX3	0.0578038	0.914855	0.0223656	326310000
Q9CS00	Cactin	Cactin	2.50327	0.0118392	-0.310235	120060000
O54833	Csnk2a2	Casein kinase II subunit alpha	0.230252	0.692343	0.0516214	325670000
Q99JB2	Stoml2	Stomatin-like protein 2, mitochondrial	1.16915	0.131089	0.265315	325240000
Q9CR09	Ufc1	Ubiquitin-fold modifier-conjugating enzyme 1	0.744066	0.282088	0.141095	325040000
Q6PFQ7;Q6PFQ7-2	Rasa4	Ras GTPase-activating protein 4	0.609876	0.359644	-0.127218	324650000
P70303;P70303-3;P70303-2;P70698	Ctps2	CTP synthase 2	1.20231	0.123318	0.180423	324380000
B2RY56	Rbm25	RNA-binding protein 25	3.58926	0.00158764	-0.310801	3729200000
Q6NZQ6-2;Q6NZQ6;Q6NZQ6-3	Znf740	Zinc finger protein 740	1.70058	0.0506927	-0.27261	323720000
P25976;P25976-2	Ubtf	Nucleolar transcription factor 1	4.66646	0.000234639	-0.31128	3450900000
Q9R233-2;Q9R233	Tapbp	Tapasin	1.80828	0.0417382	-0.311413	461860000
P27601	Gna13	Guanine nucleotide-binding protein subunit alpha-13	0.465002	0.462091	0.0787366	320360000
Q8CI33;Q8CI33-2	Cwf19l1	CWF19-like protein 1	2.4225	0.0137446	-0.311426	353230000
Q571I9	Aldh16a1	Aldehyde dehydrogenase family 16 member A1	0.476031	0.45384	0.097955	319300000
Q9DCS9	Ndufb10	NADH dehydrogenase [ubiquinone] 1 beta subcomplex subunit 10	0.0658289	0.903947	0.0176706	318810000
Q8CCF0;Q8CCF0-2	Prpf31	U4/U6 small nuclear ribonucleoprotein Prp31	5.8422	2.98e-05	-0.311438	2053000000
Q9EPB4	Pycard	Apoptosis-associated speck-like protein containing a CARD	2.88122	0.00598249	-0.311999	2601600000
Q8CJF7	Ahctf1	Protein ELYS	2.19916	0.0205881	-0.312469	577500000
Q9D7S9	Chmp5	Charged multivesicular body protein 5	0.377912	0.537393	0.13318	317230000
Q63932	Map2k2	Dual specificity mitogen-activated protein kinase kinase 2	0.210904	0.714953	-0.244877	317090000
Q99K48;Q99K48-2	Nono	Non-POU domain-containing octamer-binding protein	3.73409	0.00123924	-0.312524	20833000000
Q62086	Pon2	Serum paraoxonase/arylesterase 2	0.176836	0.756219	0.059309	316790000
Q8BMS9;Q8CB96-2;Q8CB96	Rassf2	Ras association domain-containing protein 2	1.30932	0.101517	0.340893	315870000
Q8K0V4	Cnot3	CCR4-NOT transcription complex subunit 3	1.11622	0.143178	0.21135	315090000
Q8VI33;Q6NZA9	Taf9	Transcription initiation factor TFIID subunit 9	2.06119	0.0264322	-0.312902	196170000
Q6PE01	Snrnp40	U5 small nuclear ribonucleoprotein 40 kDa protein	5.71752	3.56e-05	-0.313885	3271700000
Q6NZQ2	Ddx31		1.05758	0.158896	-0.198176	312260000
Q8K157	Galm	Aldose 1-epimerase	0.967389	0.1872	0.195754	312200000
Q640N3-2;Q640N3	Arhgap30	Rho GTPase-activating protein 30	1.31816	0.0998403	0.319288	310880000
Q8K363	Ddx18	ATP-dependent RNA helicase DDX18	2.56394	0.0105668	-0.314113	318220000
[truncated: 1,530 more rows]
