# Supplementary material for: Differential accumulation of storage bodies with aging defines discrete subsets of microglia in the healthy brain
Source: eLife. 2020 Jun 24;9:e57495. doi: 10.7554/eLife.57495 (PMC7367682; doi:10.7554/eLife.57495)
Supplement: Figure 5—source data 2. — Sheet 1: Description of the column headers. Sheet 2: Pathway overrepresentation testing for proteins upregulated in AF+ microglia. Sheet 3: Pathway overrepresentation testing for proteins upregulated in AF- microglia. [file elife-57495-fig5-data2.xlsx]

## Sheet: Description
Description of the column headers
Reactome pathways	biological pathways in Reactome database (Identifier)
Mus musculus - REFLIST (22296)	# of background proteins contained in pathway
Client Text Box Input (510)	# of dataset proteins in specified pathway
Client Text Box Input (expected)	expected # of dataset proteins in specified pathway
Client Text Box Input (over/under)	Pathway is over (+) or under (-) represented in dataset
Client Text Box Input (fold Enrichment)	level of fold enrichment of over- or under-representation
Client Text Box Input (P-value)	p value derived from Fisher test with Bonferroni correction

## Sheet: AF+ associated proteins
Figure 5 - Source Data 2
Analysis Type:	PANTHER Overrepresentation Test (Released 20190711)
Annotation Version and Release Date:	Reactome version 65 Released 2019-03-12
Analyzed List:	Client Text Box Input (Mus musculus)
Reference List:	Mus musculus (all genes in database)
Test Type:	FISHER
Correction:	BONFERRONI
Bonferroni count:	1573
Reactome pathways	Mus musculus - REFLIST (22296)	Client Text Box Input (510)	Client Text Box Input (expected)	Client Text Box Input (over/under)	Client Text Box Input (fold Enrichment)	Client Text Box Input (P-value)
Beta oxidation of hexanoyl-CoA to butanoyl-CoA (R-MMU-77350)	5	5	0.11	+	43.72	0.00198
Beta oxidation of octanoyl-CoA to hexanoyl-CoA (R-MMU-77348)	5	5	0.11	+	43.72	0.00198
Beta oxidation of decanoyl-CoA to octanoyl-CoA-CoA (R-MMU-77346)	6	5	0.14	+	36.43	0.00357
Beta oxidation of lauroyl-CoA to decanoyl-CoA-CoA (R-MMU-77310)	5	4	0.11	+	34.97	0.0448
mitochondrial fatty acid beta-oxidation of saturated fatty acids (R-MMU-77286)	9	7	0.21	+	34	4.06e-05
Activation of BAD and translocation to mitochondria (R-MMU-111447)	10	5	0.23	+	21.86	0.0215
mTORC1-mediated signalling (R-MMU-166208)	21	9	0.48	+	18.74	1.93e-05
Keratan sulfate degradation (R-MMU-2022857)	12	5	0.27	+	18.22	0.0427
Citric acid cycle (TCA cycle) (R-MMU-71403)	22	8	0.5	+	15.9	0.000354
Mitochondrial Fatty Acid Beta-Oxidation (R-MMU-77289)	39	12	0.89	+	13.45	1.56e-06
Branched-chain amino acid catabolism (R-MMU-70895)	23	7	0.53	+	13.31	0.0055
RHO GTPases Activate WASPs and WAVEs (R-MMU-5663213)	33	10	0.75	+	13.25	4.46e-05
Glycosphingolipid metabolism (R-MMU-1660662)	40	11	0.91	+	12.02	2.1e-05
Intrinsic Pathway for Apoptosis (R-MMU-109606)	26	7	0.59	+	11.77	0.0109
Insulin receptor recycling (R-MMU-77387)	27	7	0.62	+	11.33	0.0135
Lysosome Vesicle Biogenesis (R-MMU-432720)	31	8	0.71	+	11.28	0.00311
COPI-independent Golgi-to-ER retrograde traffic (R-MMU-6811436)	47	12	1.08	+	11.16	9.32e-06
ROS, RNS production in phagocytes (R-MMU-1222556)	32	8	0.73	+	10.93	0.00382
TP53 Regulates Metabolic Genes (R-MMU-5628897)	49	12	1.12	+	10.71	1.39e-05
Energy dependent regulation of mTOR by LKB1-AMPK (R-MMU-380972)	29	7	0.66	+	10.55	0.0201
mTOR signalling (R-MMU-165159)	38	9	0.87	+	10.35	0.00131
COPI-mediated anterograde transport (R-MMU-6807878)	98	23	2.24	+	10.26	4.59e-12
COPII-mediated vesicle transport (R-MMU-204005)	74	17	1.69	+	10.04	2.64e-08
Clathrin derived vesicle budding (R-MMU-421837)	67	15	1.53	+	9.79	5.65e-07
trans-Golgi Network Vesicle Budding (R-MMU-199992)	67	15	1.53	+	9.79	5.65e-07
Golgi-to-ER retrograde transport (R-MMU-8856688)	126	28	2.88	+	9.72	1.45e-14
Transferrin endocytosis and recycling (R-MMU-917977)	32	7	0.73	+	9.56	0.0349
MHC class II antigen presentation (R-MMU-2132295)	120	26	2.74	+	9.47	3.71e-13
ER to Golgi Anterograde Transport (R-MMU-199977)	155	33	3.55	+	9.31	5.11e-17
Golgi Associated Vesicle Biogenesis (R-MMU-432722)	52	11	1.19	+	9.25	0.000213
Loss of proteins required for interphase microtubule organization from the centrosome (R-MMU-380284)	67	14	1.53	+	9.14	4.77e-06
Loss of Nlp from mitotic centrosomes (R-MMU-380259)	67	14	1.53	+	9.14	4.77e-06
AURKA Activation by TPX2 (R-MMU-8854518)	70	14	1.6	+	8.74	7.81e-06
Retrograde transport at the Trans-Golgi-Network (R-MMU-6811440)	45	9	1.03	+	8.74	0.00446
Respiratory electron transport (R-MMU-611105)	61	12	1.4	+	8.6	0.000115
COPI-dependent Golgi-to-ER retrograde traffic (R-MMU-6811434)	92	18	2.1	+	8.55	6.82e-08
Ribosomal scanning and start codon recognition (R-MMU-72702)	63	12	1.44	+	8.33	0.000157
Centrosome maturation (R-MMU-380287)	76	14	1.74	+	8.05	1.97e-05
Recruitment of mitotic centrosome proteins and complexes (R-MMU-380270)	76	14	1.74	+	8.05	1.97e-05
Transport to the Golgi and subsequent modification (R-MMU-948021)	185	34	4.23	+	8.03	7.61e-16
Intra-Golgi and retrograde Golgi-to-ER traffic (R-MMU-6811442)	185	34	4.23	+	8.03	7.61e-16
Regulation of PLK1 Activity at G2/M Transition (R-MMU-2565942)	85	15	1.94	+	7.71	9.93e-06
Cap-dependent Translation Initiation (R-MMU-72737)	68	12	1.56	+	7.71	0.000328
Eukaryotic Translation Initiation (R-MMU-72613)	68	12	1.56	+	7.71	0.000328
Pyruvate metabolism and Citric Acid (TCA) cycle (R-MMU-71406)	51	9	1.17	+	7.71	0.011
Recruitment of NuMA to mitotic centrosomes (R-MMU-380320)	86	15	1.97	+	7.63	1.14e-05
Formation of the ternary complex, and subsequently, the 43S complex (R-MMU-72695)	58	10	1.33	+	7.54	0.0041
The citric acid (TCA) cycle and respiratory electron transport (R-MMU-1428517)	136	23	3.11	+	7.39	1.96e-09
Respiratory electron transport, ATP synthesis by chemiosmotic coupling, and heat production by uncoupling proteins. (R-MMU-163200)	85	14	1.94	+	7.2	6.88e-05
Complex I biogenesis (R-MMU-6799198)	55	9	1.26	+	7.15	0.0189
Sphingolipid metabolism (R-MMU-428157)	86	13	1.97	+	6.61	0.000507
Anchoring of the basal body to the plasma membrane (R-MMU-5620912)	93	14	2.13	+	6.58	0.000187
Asparagine N-linked glycosylation (R-MMU-446203)	287	43	6.56	+	6.55	1.54e-17
Membrane Trafficking (R-MMU-199991)	570	78	13.04	+	5.98	1.68e-31
Vesicle-mediated transport (R-MMU-5653656)	646	79	14.78	+	5.35	6.65e-29
VEGFA-VEGFR2 Pathway (R-MMU-4420097)	92	11	2.1	+	5.23	0.0309
Clathrin-mediated endocytosis (R-MMU-8856828)	134	16	3.07	+	5.22	0.000425
Neutrophil degranulation (R-MMU-6798695)	553	65	12.65	+	5.14	2.31e-22
Regulation of actin dynamics for phagocytic cup formation (R-MMU-2029482)	103	12	2.36	+	5.09	0.0165
Apoptosis (R-MMU-109581)	96	11	2.2	+	5.01	0.0443
Fcgamma receptor (FCGR) dependent phagocytosis (R-MMU-2029480)	124	14	2.84	+	4.94	0.00431
RHO GTPase Effectors (R-MMU-195258)	253	27	5.79	+	4.67	3.44e-07
Fatty acid metabolism (R-MMU-8978868)	199	21	4.55	+	4.61	4.23e-05
Organelle biogenesis and maintenance (R-MMU-1852241)	211	20	4.83	+	4.14	0.000448
Mitotic Prometaphase (R-MMU-68877)	192	18	4.39	+	4.1	0.00203
Innate Immune System (R-MMU-168249)	1039	97	23.77	+	4.08	1.33e-27
Translation (R-MMU-72766)	163	15	3.73	+	4.02	0.0189
G2/M Transition (R-MMU-69275)	177	16	4.05	+	3.95	0.012
Mitotic G2-G2/M phases (R-MMU-453274)	179	16	4.09	+	3.91	0.0137
Signaling by Rho GTPases (R-MMU-194315)	383	34	8.76	+	3.88	1.55e-07
Metabolism of carbohydrates (R-MMU-71387)	261	23	5.97	+	3.85	0.000196
Cilium Assembly (R-MMU-5617833)	184	16	4.21	+	3.8	0.0189
M Phase (R-MMU-68886)	341	24	7.8	+	3.08	0.0045
Metabolism of lipids (R-MMU-556833)	649	45	14.85	+	3.03	3e-07
Immune System (R-MMU-168256)	1769	122	40.46	+	3.02	3.07e-24
Metabolism (R-MMU-1430728)	1818	112	41.59	+	2.69	3.89e-18
Metabolism of proteins (R-MMU-392499)	1720	98	39.34	+	2.49	3.15e-13
Post-translational protein modification (R-MMU-597592)	1325	71	30.31	+	2.34	1.2e-07
Adaptive Immune System (R-MMU-1280218)	751	38	17.18	+	2.21	0.0177
Unclassified (UNCLASSIFIED)	12915	156	295.42	-	0.53	0
G alpha (s) signalling events (R-MMU-418555)	720	2	16.47	-	0.12	0.0271

## Sheet: AF- associated proteins
Figure 5 - Source Data 2
Analysis Type:	PANTHER Overrepresentation Test (Released 20190711)
Annotation Version and Release Date:	Reactome version 65 Released 2019-03-12
Analyzed List:	Client Text Box Input (Mus musculus)
Reference List:	Mus musculus (all genes in database)
Test Type:	FISHER
Correction:	BONFERRONI
Bonferroni count:	1573
Reactome pathways	Mus musculus - REFLIST (22296)	Client Text Box Input (392)	Client Text Box Input (expected)	Client Text Box Input (over/under)	Client Text Box Input (fold Enrichment)	Client Text Box Input (P-value)
Cohesin Loading onto Chromatin (R-MMU-2470946)	10	7	0.18	+	39.81	1.15e-05
Establishment of Sister Chromatid Cohesion (R-MMU-2468052)	11	6	0.19	+	31.02	0.000424
Mitotic Telophase/Cytokinesis (R-MMU-68884)	14	7	0.25	+	28.44	6.47e-05
mRNA Splicing - Major Pathway (R-MMU-72163)	170	77	2.99	+	25.76	2.17e-72
mRNA Splicing (R-MMU-72172)	177	77	3.11	+	24.74	2.56e-71
KSRP (KHSRP) binds and destabilizes mRNA (R-MMU-450604)	14	6	0.25	+	24.38	0.00127
Processing of Capped Intron-Containing Pre-mRNA (R-MMU-72203)	231	98	4.06	+	24.13	1.56e-91
mRNA 3'-end processing (R-MMU-72187)	55	22	0.97	+	22.75	6.26e-18
mRNA Splicing - Minor Pathway (R-MMU-72165)	48	19	0.84	+	22.51	3.75e-15
SUMOylation of RNA binding proteins (R-MMU-4570464)	33	13	0.58	+	22.41	9.59e-10
Processing of Intronless Pre-mRNAs (R-MMU-77595)	18	7	0.32	+	22.12	0.000252
RNA Polymerase II Transcription Termination (R-MMU-73856)	62	24	1.09	+	22.02	1.82e-19
Cleavage of Growing Transcript in the Termination Region (R-MMU-109688)	62	24	1.09	+	22.02	1.82e-19
mRNA decay by 3' to 5' exoribonuclease (R-MMU-429958)	16	6	0.28	+	21.33	0.00238
Transport of Mature Transcript to Cytoplasm (R-MMU-72202)	75	28	1.32	+	21.23	1.08e-22
Transport of Mature mRNA derived from an Intron-Containing Transcript (R-MMU-159236)	75	28	1.32	+	21.23	1.08e-22
Regulation of Glucokinase by Glucokinase Regulatory Protein (R-MMU-170822)	30	11	0.53	+	20.86	1.11e-07
SUMOylation of DNA replication proteins (R-MMU-4615885)	44	16	0.77	+	20.68	5.48e-12
SUMOylation of SUMOylation proteins (R-MMU-4085377)	33	12	0.58	+	20.68	1.62e-08
Processing of Capped Intronless Pre-mRNA (R-MMU-75067)	25	9	0.44	+	20.48	7.05e-06
Mismatch repair (MMR) directed by MSH2:MSH6 (MutSalpha) (R-MMU-5358565)	15	5	0.26	+	18.96	0.0296
FGFR2 alternative splicing (R-MMU-6803529)	25	8	0.44	+	18.2	0.000111
snRNP Assembly (R-MMU-191859)	47	15	0.83	+	18.15	1.96e-10
Metabolism of non-coding RNA (R-MMU-194441)	47	15	0.83	+	18.15	1.96e-10
SUMOylation of ubiquitinylation proteins (R-MMU-3232142)	38	12	0.67	+	17.96	6.33e-08
Nuclear Pore Complex (NPC) Disassembly (R-MMU-3301854)	35	11	0.62	+	17.88	4.35e-07
Mismatch Repair (R-MMU-5358508)	16	5	0.28	+	17.77	0.0382
RUNX1 interacts with co-factors whose precise effect on RUNX1 targets is not known (R-MMU-8939243)	37	11	0.65	+	16.91	7.14e-07
Butyrate Response Factor 1 (BRF1) binds and destabilizes mRNA (R-MMU-450385)	17	5	0.3	+	16.73	0.0488
Formation of Senescence-Associated Heterochromatin Foci (SAHF) (R-MMU-2559584)	17	5	0.3	+	16.73	0.0488
Nuclear Envelope Breakdown (R-MMU-2980766)	48	14	0.84	+	16.59	3.62e-09
Metabolism of RNA (R-MMU-8953854)	500	124	8.79	+	14.11	2.56e-94
SUMOylation of chromatin organization proteins (R-MMU-4551638)	53	13	0.93	+	13.95	1.41e-07
SUMOylation of DNA damage response and repair proteins (R-MMU-3108214)	74	18	1.3	+	13.84	3.67e-11
SUMOylation of transcription cofactors (R-MMU-3899300)	34	8	0.6	+	13.38	0.000822
Resolution of AP sites via the multiple-nucleotide patch replacement pathway (R-MMU-110373)	26	6	0.46	+	13.13	0.025
SUMO E3 ligases SUMOylate target proteins (R-MMU-3108232)	145	33	2.55	+	12.94	2.6e-21
SUMOylation (R-MMU-2990846)	151	34	2.65	+	12.81	6.83e-22
Major pathway of rRNA processing in the nucleolus and cytosol (R-MMU-6791226)	76	17	1.34	+	12.72	6.33e-10
rRNA processing in the nucleus and cytosol (R-MMU-8868773)	76	17	1.34	+	12.72	6.33e-10
rRNA processing (R-MMU-72312)	76	17	1.34	+	12.72	6.33e-10
Formation of RNA Pol II elongation complex (R-MMU-112382)	55	12	0.97	+	12.41	2.4e-06
RNA Polymerase II Transcription Elongation (R-MMU-75955)	55	12	0.97	+	12.41	2.4e-06
RMTs methylate histone arginines (R-MMU-3214858)	46	10	0.81	+	12.36	5.84e-05
mRNA Capping (R-MMU-72086)	28	6	0.49	+	12.19	0.036
Regulation of HSF1-mediated heat shock response (R-MMU-3371453)	67	13	1.18	+	11.04	1.75e-06
TP53 Regulates Transcription of DNA Repair Genes (R-MMU-6796648)	42	8	0.74	+	10.83	0.00331
HDACs deacetylate histones (R-MMU-3214815)	48	9	0.84	+	10.66	0.000852
Transcriptional regulation by small RNAs (R-MMU-5578749)	64	12	1.13	+	10.66	1.08e-05
Resolution of Abasic Sites (AP sites) (R-MMU-73933)	39	7	0.69	+	10.21	0.0205
Base Excision Repair (R-MMU-73884)	39	7	0.69	+	10.21	0.0205
Glycolysis (R-MMU-70171)	63	11	1.11	+	9.93	8.83e-05
Mitotic Prophase (R-MMU-68875)	90	15	1.58	+	9.48	5.96e-07
Gene Silencing by RNA (R-MMU-211000)	73	12	1.28	+	9.35	3.98e-05
Cellular response to heat stress (R-MMU-3371556)	87	14	1.53	+	9.15	3.47e-06
B-WICH complex positively regulates rRNA expression (R-MMU-5250924)	50	8	0.88	+	9.1	0.0105
Positive epigenetic regulation of rRNA expression (R-MMU-5250913)	50	8	0.88	+	9.1	0.0105
RNA Polymerase I Transcription Initiation (R-MMU-73762)	45	7	0.79	+	8.85	0.0469
RNA Polymerase II Pre-transcription Events (R-MMU-674695)	78	12	1.37	+	8.75	7.67e-05
Epigenetic regulation of gene expression (R-MMU-212165)	69	10	1.21	+	8.24	0.00166
Gap-filling DNA repair synthesis and ligation in TC-NER (R-MMU-6782210)	64	9	1.13	+	8	0.00721
RNA polymerase II transcribes snRNA genes (R-MMU-6807505)	74	10	1.3	+	7.69	0.00295
Nucleotide Excision Repair (R-MMU-5696398)	104	14	1.83	+	7.66	2.7e-05
Glucose metabolism (R-MMU-70326)	82	11	1.44	+	7.63	0.000961
RNA Polymerase I Transcription (R-MMU-73864)	69	9	1.21	+	7.42	0.0125
Chromatin modifying enzymes (R-MMU-3247509)	183	23	3.22	+	7.15	2.4e-09
Chromatin organization (R-MMU-4839726)	183	23	3.22	+	7.15	2.4e-09
Regulation of mRNA stability by proteins that bind AU-rich elements (R-MMU-450531)	81	10	1.42	+	7.02	0.00616
Transcription-Coupled Nucleotide Excision Repair (TC-NER) (R-MMU-6781827)	77	9	1.35	+	6.65	0.028
Resolution of Sister Chromatid Cohesion (R-MMU-2500257)	121	14	2.13	+	6.58	0.000151
Gene expression (Transcription) (R-MMU-74160)	961	98	16.9	+	5.8	5.29e-41
S Phase (R-MMU-69242)	147	14	2.58	+	5.42	0.00133
RNA Polymerase II Transcription (R-MMU-73857)	851	78	14.96	+	5.21	1.05e-28
Mitotic Anaphase (R-MMU-68882)	188	17	3.31	+	5.14	0.000179
DNA Double-Strand Break Repair (R-MMU-5693532)	133	12	2.34	+	5.13	0.0135
Mitotic Metaphase and Anaphase (R-MMU-2555396)	189	17	3.32	+	5.12	0.000192
Transcriptional regulation by RUNX1 (R-MMU-8878171)	167	15	2.94	+	5.11	0.00108
Separation of Sister Chromatids (R-MMU-2467813)	185	16	3.25	+	4.92	0.000736
M Phase (R-MMU-68886)	341	29	6	+	4.84	2.25e-08
DNA Repair (R-MMU-73894)	271	23	4.76	+	4.83	3.16e-06
Cell Cycle (R-MMU-1640170)	541	43	9.51	+	4.52	1.88e-12
Mitotic Prometaphase (R-MMU-68877)	192	15	3.38	+	4.44	0.00542
Cell Cycle, Mitotic (R-MMU-69278)	472	35	8.3	+	4.22	6.21e-09
Cell Cycle Checkpoints (R-MMU-69620)	262	18	4.61	+	3.91	0.00325
Transcriptional Regulation by TP53 (R-MMU-3700989)	276	18	4.85	+	3.71	0.00646
Cellular responses to stress (R-MMU-2262752)	354	23	6.22	+	3.7	0.000318
Generic Transcription Pathway (R-MMU-212436)	733	45	12.89	+	3.49	2.21e-09
Cellular responses to external stimuli (R-MMU-8953897)	416	23	7.31	+	3.14	0.00438
Post-translational protein modification (R-MMU-597592)	1325	48	23.3	+	2.06	0.00495
Unclassified (UNCLASSIFIED)	12915	133	227.07	-	0.59	0
GPCR downstream signalling (R-MMU-388396)	1270	1	22.33	-	0.04	8.91e-06
Signaling by GPCR (R-MMU-372790)	1294	1	22.75	-	0.04	5.99e-06
