# Supplementary material for: Differential accumulation of storage bodies with aging defines discrete subsets of microglia in the healthy brain
Source: eLife. 2020 Jun 24;9:e57495. doi: 10.7554/eLife.57495 (PMC7367682; doi:10.7554/eLife.57495)
Supplement: Figure 5—source data 3. — Sheet 1: Description of the column headers. Sheet 2: Overlap of differentially regulated proteins with IPA canonical pathways based on input list of 351 proteins with adj. p val <0.01 and fold change > |1.3|. Sheet 3: Upstream regulators identified by IPA based on input list of 351 differentially regulated proteins with adj. p val <0.01 and fold change > |1.3|. [file elife-57495-fig5-data3.xlsx]

## Sheet: Description
Canonical Pathways (Sheet 2)
Description of the column headers
Ingenuity Canonical Pathways	biological pathways
-log(p-value)	p value of pathway overlap
Ratio	fraction of pathway represented in dataset
z-score	predicted activation (+) or inhibition (-) of pathway
Molecules	input proteins identified as members of pathway
UpstreamRegulators (Sheet 3)
Description of the column headers
Upstream Regulator	molecular regulator
Expr Log Ratio	log fold-change of regulator
Molecule Type	class of regulator (miRNA, kinase, transcription factor, protease, etc)
Predicted Activation State	Activity of molecular regulator is inhibited or activated
Activation z-score	degree of activation/inhibition of regulator
p-value of overlap	Fisher’s Exact Test p value of overlap
Target Molecules in Dataset	input proteins downstream of molecular regulator

## Sheet: Canonical Pathways
Figure 5 - Source Data 3
© 2000-2020 QIAGEN. All rights reserved.
Ingenuity Canonical Pathways	-log(p-value)	Ratio	z-score	Molecules
Phagosome Maturation	22	0.185	#NUM!	ATP6V0D1,ATP6V1A,ATP6V1B2,ATP6V1C1,ATP6V1E1,ATP6V1G1,CTSA,CTSB,CTSC,CTSD,CTSF,CTSH,CTSV,CTSZ,LAMP1,LAMP2,M6PR,NAPA,RAB7A,SNAP25,TSG101,TUBG1,VAMP2,VPS11,VPS16,VPS39,VPS41,VTI1B
Autophagy	14	0.246	#NUM!	CTSA,CTSB,CTSC,CTSD,CTSF,CTSH,CTSV,CTSZ,LAMP1,LAMP2,MTOR,VPS11,VPS16,VPS39,VPS41
Chondroitin Sulfate Degradation (Metazoa)	5.56	0.312	2.236	ARSB,GALNS,GM2A,HEXA,HEXB
Tryptophan Degradation III (Eukaryotic)	4.71	0.217	1.342	HAAO,HADH,HADHA,HSD17B10,HSD17B4
Isoleucine Degradation I	4.24	0.267	2	ACADSB,BCAT2,HADHA,HSD17B10
Glutaryl-CoA Degradation	4.12	0.25	2	HADH,HADHA,HSD17B10,HSD17B4
Fatty Acid β-oxidation I	3.99	0.156	2.236	HADH,HADHA,HSD17B10,HSD17B4,SCP2
Valine Degradation I	3.9	0.222	2	ACADSB,ALDH6A1,BCAT2,HADHA
DNA Methylation and Transcriptional Repression Signaling	3.85	0.147	#NUM!	DNMT1,MBD2,MTA2,SAP18,SIN3A
Role of BRCA1 in DNA Damage Response	2.9	0.075	#NUM!	MDC1,MSH6,NBN,PBRM1,RPA1,SMARCC1
PRPP Biosynthesis I	2.89	0.5	#NUM!	PRPS1,PRPS2
Choline Biosynthesis III	2.88	0.2	#NUM!	GPLD1,PLD3,PLD4
Dermatan Sulfate Degradation (Metazoa)	2.72	0.176	#NUM!	GM2A,HEXA,HEXB
Lactose Degradation III	2.49	0.333	#NUM!	GLB1,PSAP
Mitochondrial Dysfunction	2.37	0.0468	#NUM!	AIFM1,ATP5PD,COX5A,CYC1,HSD17B10,NDUFV2,NDUFV3,OGDH
Iron homeostasis signaling pathway	2.34	0.0511	#NUM!	ATP6V0D1,ATP6V1A,ATP6V1B2,ATP6V1C1,ATP6V1E1,ATP6V1G1,FECH
Leucine Degradation I	2.13	0.222	#NUM!	BCAT2,HMGCL
Huntington's Disease Signaling	2.02	0.038	#NUM!	CLTA,CLTC,CTSD,MTOR,NAPA,SIN3A,SNAP25,VAMP2,VTI1B
Inhibition of ARE-Mediated mRNA Degradation Pathway	2	0.0492	0.816	DDX6,DIS3,EDC4,EXOSC3,EXOSC6,PRKAR2A
Ketogenesis	1.95	0.182	#NUM!	HADHA,HMGCL
Sirtuin Signaling Pathway	1.91	0.0344	-1.667	CYC1,GABPA,H1-2,IDH2,MTOR,NBN,NDUFV2,NDUFV3,PDK1,RPTOR
mTOR Signaling	1.86	0.0381	1.89	AKT1S1,GPLD1,MTOR,PLD3,PLD4,RPS5,RPS6KA5,RPTOR
AMPK Signaling	1.84	0.0377	2.236	AKT1S1,MTOR,PBRM1,PRKAR2A,RAB6A,RAB7A,RPTOR,SMARCC1
DNA Double-Strand Break Repair by Homologous Recombination	1.75	0.143	#NUM!	NBN,RPA1
Hereditary Breast Cancer Signaling	1.73	0.0429	#NUM!	MSH6,NBN,PBRM1,RPA1,SMARCC1,TUBG1
Mechanisms of Viral Exit from Host Cells	1.64	0.0732	#NUM!	LMNB1,SH3GLB2,TSG101
Estrogen Biosynthesis	1.64	0.0732	#NUM!	Akr1b7,HSD17B10,HSD17B4
Mismatch Repair in Eukaryotes	1.63	0.125	#NUM!	MSH6,RPA1
Oxidative Phosphorylation	1.62	0.0459	2.236	ATP5PD,COX5A,CYC1,NDUFV2,NDUFV3
Clathrin-mediated Endocytosis Signaling	1.58	0.0363	#NUM!	AP1B1,AP3B1,CLTA,CLTC,RAB7A,SH3GLB2,TSG101
Methylglyoxal Degradation III	1.54	0.111	#NUM!	Akr1b7,PRXL2B
β-alanine Degradation I	1.53	0.5	#NUM!	ALDH6A1
Uridine-5'-phosphate Biosynthesis	1.53	0.5	#NUM!	CAD
PFKFB4 Signaling Pathway	1.51	0.0652	#NUM!	PRKAR2A,RPS6KA5,TKT
Granzyme A Signaling	1.49	0.105	#NUM!	H1-2,HMGB2
Anandamide Degradation	1.36	0.333	#NUM!	NAAA
Thyroid Hormone Biosynthesis	1.36	0.333	#NUM!	CTSD
Oxidized GTP and dGTP Detoxification	1.36	0.333	#NUM!	DDX6
Tumoricidal Function of Hepatic Natural Killer Cells	1.31	0.0833	#NUM!	AIFM1,M6PR
Cell Cycle Control of Chromosomal Replication	1.29	0.0536	#NUM!	MCM2,MCM4,RPA1
Fcγ Receptor-mediated Phagocytosis in Macrophages and Monocytes	1.28	0.0426	2	GPLD1,PLD3,PLD4,PXN
Tryptophan Degradation X (Mammalian, via Tryptamine)	1.27	0.08	#NUM!	ALDH2,RDH14
Role of CHK Proteins in Cell Cycle Checkpoint Control	1.27	0.0526	#NUM!	MDC1,NBN,RPA1
Lipid Antigen Presentation by CD1	1.24	0.0769	#NUM!	AP1B1,PSAP
Ovarian Cancer Signaling	1.24	0.036	#NUM!	GJA1,MSH6,MTOR,PRKAR2A,SIN3A
Heme Biosynthesis from Uroporphyrinogen-III I	1.23	0.25	#NUM!	FECH
Phenylethylamine Degradation I	1.23	0.25	#NUM!	ALDH2
Methylmalonyl Pathway	1.23	0.25	#NUM!	PCCB
Endocannabinoid Cancer Inhibition Pathway	1.2	0.035	-1.342	AKT1S1,MTOR,PRKAR2A,RPTOR,SMPD1
Phospholipases	1.17	0.0476	#NUM!	GPLD1,PLD3,PLD4
Superpathway of Cholesterol Biosynthesis	1.16	0.069	#NUM!	HADHA,LBR
2-ketoglutarate Dehydrogenase Complex	1.14	0.2	#NUM!	OGDH
2-oxobutanoate Degradation I	1.14	0.2	#NUM!	PCCB
Virus Entry via Endocytic Pathways	1.12	0.0374	#NUM!	AP1B1,AP3B1,CLTA,CLTC
Opioid Signaling Pathway	1.11	0.0283	0.378	AP1B1,CAMK1,CLTA,CLTC,PDK1,PRKAR2A,RPS6KA5
Pancreatic Adenocarcinoma Signaling	1.09	0.0367	#NUM!	GPLD1,PLD3,PLD4,SIN3A
Glioma Signaling	1.08	0.0364	#NUM!	CAMK1,IDH2,MTOR,SIN3A
Pentose Phosphate Pathway (Non-oxidative Branch)	1.06	0.167	#NUM!	TKT
Tryptophan Degradation to 2-amino-3-carboxymuconate Semialdehyde	1.06	0.167	#NUM!	HAAO
Ceramide Degradation	1.06	0.167	#NUM!	ASAH1
Zymosterol Biosynthesis	1.06	0.167	#NUM!	LBR
Endocannabinoid Developing Neuron Pathway	1.03	0.0348	#NUM!	AKT1S1,MTOR,PRKAR2A,RPTOR
Caveolar-mediated Endocytosis Signaling	1.02	0.0411	#NUM!	COPB1,COPG2,FLOT2
Synaptogenesis Signaling Pathway	1.02	0.0256	2.646	AP1B1,MTOR,NAP1L1,NAPA,PRKAR2A,SNAP25,VAMP2,VTI1B
Estrogen-Dependent Breast Cancer Signaling	1.01	0.0405	#NUM!	Akr1b7,HSD17B10,HSD17B4
Tight Junction Signaling	0.971	0.0298	#NUM!	NAPA,PRKAR2A,SNAP25,VAMP2,VTI1B
Sphingosine and Sphingosine-1-phosphate Metabolism	0.947	0.125	#NUM!	ASAH1
Sphingomyelin Metabolism	0.947	0.125	#NUM!	SMPD1
Heme Biosynthesis II	0.9	0.111	#NUM!	FECH
Prostanoid Biosynthesis	0.854	0.1	#NUM!	HPGDS
Pentose Phosphate Pathway	0.854	0.1	#NUM!	TKT
Ketolysis	0.854	0.1	#NUM!	HADHA
CTLA4 Signaling in Cytotoxic T Lymphocytes	0.83	0.0337	#NUM!	AP1B1,CLTA,CLTC
Acute Myeloid Leukemia Signaling	0.83	0.0337	#NUM!	IDH2,MTOR,RUNX1
Stearate Biosynthesis I (Animals)	0.824	0.0435	#NUM!	PPT1,PRXL2B
Insulin Receptor Signaling	0.812	0.0288	1	MTOR,PRKAR2A,RPTOR,VAMP2
Cleavage and Polyadenylation of Pre-mRNA	0.783	0.0833	#NUM!	WDR33
ATM Signaling	0.754	0.0309	#NUM!	CBX5,MDC1,NBN
NAD biosynthesis II (from tryptophan)	0.752	0.0769	#NUM!	HAAO
Acyl-CoA Hydrolysis	0.752	0.0769	#NUM!	PPT1
Oleate Biosynthesis II (Animals)	0.752	0.0769	#NUM!	ALDH6A1
Cholesterol Biosynthesis I	0.752	0.0769	#NUM!	LBR
NAD Phosphorylation and Dephosphorylation	0.752	0.0769	#NUM!	ACP2
Bile Acid Biosynthesis, Neutral Pathway	0.752	0.0769	#NUM!	SCP2
Cholesterol Biosynthesis II (via 24,25-dihydrolanosterol)	0.752	0.0769	#NUM!	LBR
Cholesterol Biosynthesis III (via Desmosterol)	0.752	0.0769	#NUM!	LBR
Breast Cancer Regulation by Stathmin1	0.745	0.025	#NUM!	CAMK1,PRKAR2A,STMN1,TSG101,TUBG1
UVA-Induced MAPK Signaling	0.745	0.0306	#NUM!	MTOR,RPS6KA5,SMPD1
UVB-Induced MAPK Signaling	0.74	0.0385	#NUM!	MTOR,RPS6KA5
DNA Double-Strand Break Repair by Non-Homologous End Joining	0.721	0.0714	#NUM!	NBN
Glycogen Degradation III	0.721	0.0714	#NUM!	GAA
Mevalonate Pathway I	0.721	0.0714	#NUM!	HADHA
Phenylalanine Degradation IV (Mammalian, via Side Chain)	0.721	0.0714	#NUM!	ALDH2
Sumoylation Pathway	0.701	0.0291	#NUM!	RCC1,RPA1,SUMO1
NER Pathway	0.701	0.0291	#NUM!	HMGN1,RPA1,XAB2
Telomere Extension by Telomerase	0.695	0.0667	#NUM!	NBN
CNTF Signaling	0.68	0.0351	#NUM!	MTOR,RPS6KA5
Granzyme B Signaling	0.67	0.0625	#NUM!	LMNB1
Antioxidant Action of Vitamin C	0.654	0.0275	#NUM!	GPLD1,PLD3,PLD4
RAN Signaling	0.648	0.0588	#NUM!	RCC1
D-myo-inositol (1,4,5)-trisphosphate Degradation	0.648	0.0588	#NUM!	SEC16A
Histamine Degradation	0.648	0.0588	#NUM!	ALDH2
SPINK1 Pancreatic Cancer Pathway	0.648	0.0333	#NUM!	CTSA,CTSB
1D-myo-inositol Hexakisphosphate Biosynthesis II (Mammalian)	0.625	0.0556	#NUM!	SEC16A
D-myo-inositol (1,3,4)-trisphosphate Biosynthesis	0.625	0.0556	#NUM!	SEC16A
Superpathway of Geranylgeranyldiphosphate Biosynthesis I (via Mevalonate)	0.625	0.0556	#NUM!	HADHA
Oxidative Ethanol Degradation III	0.606	0.0526	#NUM!	ALDH2
Neuroprotective Role of THOP1 in Alzheimer's Disease	0.602	0.0259	#NUM!	LONP1,PRKAR2A,TPP1
Systemic Lupus Erythematosus Signaling	0.59	0.0218	#NUM!	MTOR,PRPF40A,SF3B4,SNRPD2,SNRPF
The Visual Cycle	0.585	0.05	#NUM!	RDH14
Fatty Acid α-oxidation	0.585	0.05	#NUM!	ALDH2
Inflammasome pathway	0.585	0.05	#NUM!	CTSB
Remodeling of Epithelial Adherens Junctions	0.57	0.0294	#NUM!	RAB7A,TUBG1
Putrescine Degradation III	0.567	0.0476	#NUM!	ALDH2
Superpathway of D-myo-inositol (1,4,5)-trisphosphate Metabolism	0.535	0.0435	#NUM!	SEC16A
Ethanol Degradation IV	0.535	0.0435	#NUM!	ALDH2
TCA Cycle II (Eukaryotic)	0.519	0.0417	#NUM!	OGDH
Toll-like Receptor Signaling	0.503	0.0263	#NUM!	TLR3,TOLLIP
NAD Salvage Pathway II	0.491	0.0385	#NUM!	ACP2
RAR Activation	0.488	0.0207	#NUM!	PBRM1,PRKAR2A,RDH14,SMARCC1
ERK/MAPK Signaling	0.488	0.0207	#NUM!	LAMTOR3,PRKAR2A,PXN,RPS6KA5
Agrin Interactions at Neuromuscular Junction	0.481	0.0253	#NUM!	GABPA,PXN
FLT3 Signaling in Hematopoietic Progenitor Cells	0.475	0.025	#NUM!	MTOR,RPS6KA5
IL-8 Signaling	0.457	0.02	2	GPLD1,MTOR,PLD3,PLD4
Sonic Hedgehog Signaling	0.452	0.0345	#NUM!	PRKAR2A
Aryl Hydrocarbon Receptor Signaling	0.445	0.021	#NUM!	ALDH2,ALDH6A1,CTSD
Dopamine Degradation	0.44	0.0333	#NUM!	ALDH2
Acetone Degradation I (to Methylglyoxal)	0.44	0.0333	#NUM!	PRXL2B
Ceramide Signaling	0.423	0.0227	#NUM!	CTSD,SMPD1
Glutathione-mediated Detoxification	0.418	0.0312	#NUM!	HPGDS
Ethanol Degradation II	0.418	0.0312	#NUM!	ALDH2
Retinoate Biosynthesis I	0.408	0.0303	#NUM!	RDH14
Prostate Cancer Signaling	0.405	0.022	#NUM!	MTOR,SIN3A
IL-1 Signaling	0.405	0.022	#NUM!	PRKAR2A,TOLLIP
Th17 Activation Pathway	0.405	0.022	#NUM!	MTOR,RUNX1
Actin Cytoskeleton Signaling	0.388	0.0183	#NUM!	BRK1,NCKAP1L,PXN,WASF2
Noradrenaline and Adrenaline Degradation	0.388	0.0286	#NUM!	ALDH2
Nucleotide Excision Repair Pathway	0.388	0.0286	#NUM!	RPA1
Melanocyte Development and Pigmentation Signaling	0.387	0.0213	#NUM!	PRKAR2A,RPS6KA5
Gαq Signaling	0.381	0.0191	#NUM!	GPLD1,PLD3,PLD4
Interferon Signaling	0.379	0.0278	#NUM!	IFI35
Bladder Cancer Signaling	0.372	0.0206	#NUM!	RPS6KA5,SIN3A
Superpathway of Methionine Degradation	0.37	0.027	#NUM!	PCCB
Notch Signaling	0.37	0.027	#NUM!	RBPJ
Nitric Oxide Signaling in the Cardiovascular System	0.361	0.0202	#NUM!	PDE2A,PRKAR2A
Apoptosis Signaling	0.361	0.0202	#NUM!	AIFM1,LMNA
cAMP-mediated signaling	0.354	0.0175	#NUM!	CAMK1,LAMTOR3,PDE2A,PRKAR2A
tRNA Charging	0.353	0.0256	#NUM!	KARS1
Neuropathic Pain Signaling In Dorsal Horn Neurons	0.351	0.0198	#NUM!	CAMK1,PRKAR2A
Role of PKR in Interferon Induction and Antiviral Response	0.337	0.0244	#NUM!	TLR3
IGF-1 Signaling	0.336	0.0192	#NUM!	PRKAR2A,PXN
Role of IL-17F in Allergic Inflammatory Airway Diseases	0.33	0.0238	#NUM!	RPS6KA5
Retinol Biosynthesis	0.33	0.0238	#NUM!	RDH14
Pyrimidine Ribonucleotides De Novo Biosynthesis	0.322	0.0233	#NUM!	CAD
tRNA Splicing	0.322	0.0233	#NUM!	PDE2A
BAG2 Signaling Pathway	0.322	0.0233	#NUM!	CTSB
Role of RIG1-like Receptors in Antiviral Innate Immunity	0.315	0.0227	#NUM!	MAVS
Apelin Pancreas Signaling Pathway	0.315	0.0227	#NUM!	PRKAR2A
IL-23 Signaling Pathway	0.315	0.0227	#NUM!	RUNX1
Role of Oct4 in Mammalian Embryonic Stem Cell Pluripotency	0.302	0.0217	#NUM!	TASOR
NGF Signaling	0.293	0.0175	#NUM!	RPS6KA5,SMPD1
Sphingosine-1-phosphate Signaling	0.281	0.0171	#NUM!	ASAH1,SMPD1
Role of Tissue Factor in Cancer	0.281	0.0171	#NUM!	MTOR,RPS6KA5
p38 MAPK Signaling	0.278	0.0169	#NUM!	HMGN1,RPS6KA5
Amyloid Processing	0.277	0.02	#NUM!	PRKAR2A
Endothelin-1 Signaling	0.273	0.016	#NUM!	GPLD1,PLD3,PLD4
UVC-Induced MAPK Signaling	0.271	0.0196	#NUM!	SMPD1
LXR/RXR Activation	0.267	0.0165	#NUM!	HADH,TLR3
ILK Signaling	0.267	0.0158	#NUM!	MTOR,PXN,RPS6KA5
Phototransduction Pathway	0.26	0.0189	#NUM!	PRKAR2A
Transcriptional Regulatory Network in Embryonic Stem Cells	0.255	0.0185	#NUM!	ZFHX3
Systemic Lupus Erythematosus In T Cell Signaling Pathway	0.255	0.015	2.236	AKT1S1,DNMT1,MTOR,PDK1,RPTOR
EGF Signaling	0.249	0.0182	#NUM!	MTOR
14-3-3-mediated Signaling	0.246	0.0157	#NUM!	AKT1S1,TUBG1
Gap Junction Signaling	0.245	0.0152	#NUM!	GJA1,PRKAR2A,TUBG1
Reelin Signaling in Neurons	0.24	0.0155	#NUM!	MTOR,PDK1
Cancer Drug Resistance By Drug Efflux	0.235	0.0172	#NUM!	PDK1
Cellular Effects of Sildenafil (Viagra)	0.234	0.0153	#NUM!	PDE2A,PRKAR2A
Nur77 Signaling in T Lymphocytes	0.231	0.0169	#NUM!	SIN3A
Adipogenesis pathway	0.225	0.0149	#NUM!	SAP18,SIN3A
Activation of IRF by Cytosolic Pattern Recognition Receptors	0.213	0.0159	#NUM!	MAVS
PXR/RXR Activation	0.205	0.0154	#NUM!	PRKAR2A
Netrin Signaling	0.205	0.0154	#NUM!	PRKAR2A
Regulation of Cellular Mechanics by Calpain Protease	0.205	0.0154	#NUM!	PXN
Eicosanoid Signaling	0.201	0.0152	#NUM!	HPGDS
Serotonin Degradation	0.197	0.0149	#NUM!	ALDH2
Cell Cycle: G1/S Checkpoint Regulation	0.197	0.0149	#NUM!	SIN3A
Glucocorticoid Receptor Signaling	0	0.0119	#NUM!	PBRM1,SMARCC1,SUMO1,TSG101
Neuregulin Signaling	0	0.0104	#NUM!	MTOR
Leukocyte Extravasation Signaling	0	0.0102	#NUM!	PXN,WIPF1
Synaptic Long Term Potentiation	0	0.00775	#NUM!	PRKAR2A
Axonal Guidance Signaling	0	0.0103	#NUM!	KLC1,PRKAR2A,PXN,TUBG1,WIPF1
PPARα/RXRα Activation	0	0.00526	#NUM!	PRKAR2A
LPS/IL-1 Mediated Inhibition of RXR Function	0	0.0134	#NUM!	ACOX3,ALDH2,ALDH6A1
p53 Signaling	0	0.0102	#NUM!	SERPINE2
Acute Phase Response Signaling	0	0.00559	#NUM!	MTOR
Hepatic Cholestasis	0	0.00543	#NUM!	PRKAR2A
VDR/RXR Activation	0	0.0128	#NUM!	YY1
TR/RXR Activation	0	0.0119	#NUM!	MTOR
Regulation of Actin-based Motility by Rho	0	0.0106	#NUM!	WIPF1
α-Adrenergic Signaling	0	0.0105	#NUM!	PRKAR2A
IL-12 Signaling and Production in Macrophages	0	0.00758	#NUM!	RAB7A
Role of Pattern Recognition Receptors in Recognition of Bacteria and Viruses	0	0.013	#NUM!	MAVS,TLR3
TREM1 Signaling	0	0.0133	#NUM!	TLR3
CXCR4 Signaling	0	0.00599	#NUM!	PXN
Dendritic Cell Maturation	0	0.00546	#NUM!	TLR3
Melatonin Signaling	0	0.0139	#NUM!	PRKAR2A
Relaxin Signaling	0	0.0133	#NUM!	PDE2A,PRKAR2A
Renin-Angiotensin Signaling	0	0.00847	#NUM!	PRKAR2A
Thrombin Signaling	0	0.00481	#NUM!	CAMK1
Cardiac Hypertrophy Signaling	0	0.00833	#NUM!	MTOR,PRKAR2A
CDK5 Signaling	0	0.00926	#NUM!	PRKAR2A
Molecular Mechanisms of Cancer	0	0.0128	#NUM!	LAMTOR3,NBN,PRKAR2A,RBPJ,SIN3A
Corticotropin Releasing Hormone Signaling	0	0.0069	#NUM!	PRKAR2A
HGF Signaling	0	0.00901	#NUM!	PXN
GNRH Signaling	0	0.0116	#NUM!	PRKAR2A,PXN
Cholecystokinin/Gastrin-mediated Signaling	0	0.0084	#NUM!	PXN
Androgen Signaling	0	0.00735	#NUM!	PRKAR2A
Germ Cell-Sertoli Cell Junction Signaling	0	0.0117	#NUM!	PXN,TUBG1
Growth Hormone Signaling	0	0.0141	#NUM!	RPS6KA5
CREB Signaling in Neurons	0	0.00483	#NUM!	PRKAR2A
Small Cell Lung Cancer Signaling	0	0.0141	#NUM!	SIN3A
Type II Diabetes Mellitus Signaling	0	0.0141	#NUM!	MTOR,SMPD1
Chronic Myeloid Leukemia Signaling	0	0.00971	#NUM!	SIN3A
Non-Small Cell Lung Cancer Signaling	0	0.0137	#NUM!	SIN3A
Gα12/13 Signaling	0	0.00769	#NUM!	PXN
p70S6K Signaling	0	0.00775	#NUM!	MTOR
ERK5 Signaling	0	0.0139	#NUM!	RPS6KA5
Colorectal Cancer Metastasis Signaling	0	0.0119	#NUM!	MSH6,PRKAR2A,TLR3
G Beta Gamma Signaling	0	0.0082	#NUM!	PRKAR2A
Communication between Innate and Adaptive Immune Cells	0	0.0104	#NUM!	TLR3
Crosstalk between Dendritic Cells and Natural Killer Cells	0	0.0112	#NUM!	TLR3
Cdc42 Signaling	0	0.012	#NUM!	EXOC7,WIPF1
FAK Signaling	0	0.0105	#NUM!	PXN
EIF2 Signaling	0	0.00893	#NUM!	RPL37A,RPS5
PAK Signaling	0	0.0103	#NUM!	PXN
Rac Signaling	0	0.00893	#NUM!	BRK1
Phospholipase C Signaling	0	0.0117	#NUM!	GPLD1,PLD3,PLD4
Altered T Cell and B Cell Signaling in Rheumatoid Arthritis	0	0.0111	#NUM!	TLR3
Atherosclerosis Signaling	0	0.00794	#NUM!	GLG1
Protein Kinase A Signaling	0	0.0101	#NUM!	H1-2,PDE2A,PRKAR2A,PXN
Role of Macrophages, Fibroblasts and Endothelial Cells in Rheumatoid Arthritis	0	0.00321	#NUM!	TLR3
Regulation of eIF4 and p70S6K Signaling	0	0.0127	#NUM!	MTOR,RPS5
Leptin Signaling in Obesity	0	0.0135	#NUM!	PRKAR2A
Role of NFAT in Cardiac Hypertrophy	0	0.00935	#NUM!	CAMK1,PRKAR2A
Glioblastoma Multiforme Signaling	0	0.00606	#NUM!	MTOR
PI3K Signaling in B Lymphocytes	0	0.00725	#NUM!	CD180
P2Y Purigenic Receptor Signaling Pathway	0	0.00787	#NUM!	PRKAR2A
Cyclins and Cell Cycle Regulation	0	0.0123	#NUM!	SIN3A
Actin Nucleation by ARP-WASP Complex	0	0.0139	#NUM!	WIPF1
Dopamine-DARPP32 Feedback in cAMP Signaling	0	0.00613	#NUM!	PRKAR2A
Paxillin Signaling	0	0.00926	#NUM!	PXN
Signaling by Rho Family GTPases	0	0.0082	#NUM!	STMN1,WIPF1
RhoGDI Signaling	0	0.00556	#NUM!	WASF2
Sertoli Cell-Sertoli Cell Junction Signaling	0	0.0108	#NUM!	PRKAR2A,TUBG1
Telomerase Signaling	0	0.00935	#NUM!	TPP1
eNOS Signaling	0	0.00629	#NUM!	PRKAR2A
Ephrin B Signaling	0	0.0139	#NUM!	PXN
ErbB Signaling	0	0.0106	#NUM!	MTOR
D-myo-inositol-5-phosphate Metabolism	0	0.00645	#NUM!	PALD1
D-myo-inositol (1,4,5,6)-Tetrakisphosphate Biosynthesis	0	0.00714	#NUM!	PALD1
Superpathway of Inositol Phosphate Compounds	0	0.0102	#NUM!	PALD1,SEC16A
D-myo-inositol (3,4,5,6)-tetrakisphosphate Biosynthesis	0	0.00714	#NUM!	PALD1
3-phosphoinositide Degradation	0	0.00649	#NUM!	PALD1
3-phosphoinositide Biosynthesis	0	0.0061	#NUM!	PALD1
Epithelial Adherens Junction Signaling	0	0.00658	#NUM!	TUBG1
Gαi Signaling	0	0.008	#NUM!	PRKAR2A
Gαs Signaling	0	0.00935	#NUM!	PRKAR2A
PEDF Signaling	0	0.0122	#NUM!	WASF2
Agranulocyte Adhesion and Diapedesis	0	0.00521	#NUM!	GLG1
Granulocyte Adhesion and Diapedesis	0	0.00559	#NUM!	GLG1
Regulation of the Epithelial-Mesenchymal Transition Pathway	0	0.00521	#NUM!	RBPJ
Sperm Motility	0	0.00897	#NUM!	PDE2A,PRKAR2A
Estrogen Receptor Signaling	0	0.0073	#NUM!	MED15
PI3K/AKT Signaling	0	0.00575	#NUM!	MTOR
Cardiac β-adrenergic Signaling	0	0.0142	#NUM!	PDE2A,PRKAR2A
Protein Ubiquitination Pathway	0	0.00366	#NUM!	USO1
FGF Signaling	0	0.0119	#NUM!	RPS6KA5
JAK/Stat Signaling	0	0.0125	#NUM!	MTOR
GABA Receptor Signaling	0	0.0105	#NUM!	AP1B1
Xenobiotic Metabolism Signaling	0	0.0139	#NUM!	ALDH2,ALDH6A1,CAMK1,SUMO1
IL-4 Signaling	0	0.0118	#NUM!	MTOR
B Cell Receptor Signaling	0	0.00541	#NUM!	MTOR
Wnt/β-catenin Signaling	0	0.00578	#NUM!	GJA1
Chemokine Signaling	0	0.0125	#NUM!	CAMK1
Integrin Signaling	0	0.00939	#NUM!	PXN,WIPF1
Death Receptor Signaling	0	0.011	#NUM!	LMNA
Dopamine Receptor Signaling	0	0.013	#NUM!	PRKAR2A
NF-κB Signaling	0	0.00559	#NUM!	TLR3
VEGF Signaling	0	0.0101	#NUM!	PXN
Hypoxia Signaling in the Cardiovascular System	0	0.0135	#NUM!	SUMO1
G-Protein Coupled Receptor Signaling	0	0.011	#NUM!	LAMTOR3,PDE2A,PRKAR2A
BMP signaling pathway	0	0.0118	#NUM!	PRKAR2A
GPCR-Mediated Integration of Enteroendocrine Signaling Exemplified by an L Cell	0	0.0137	#NUM!	PRKAR2A
GPCR-Mediated Nutrient Sensing in Enteroendocrine Cells	0	0.00893	#NUM!	PRKAR2A
Gustation Pathway	0	0.013	#NUM!	PDE2A,PRKAR2A
Phagosome Formation	0	0.008	#NUM!	TLR3
Macropinocytosis Signaling	0	0.0132	#NUM!	ANKFY1
Osteoarthritis Pathway	0	0.00948	#NUM!	MTOR,RBPJ
Neuroinflammation Signaling Pathway	0	0.00667	#NUM!	MFGE8,TLR3
Adrenomedullin signaling pathway	0	0.00508	#NUM!	PRKAR2A
SPINK1 General Cancer Pathway	0	0.0145	#NUM!	Mt1
Endocannabinoid Neuronal Synapse Pathway	0	0.00781	#NUM!	PRKAR2A
Apelin Adipocyte Signaling Pathway	0	0.0122	#NUM!	PRKAR2A
Apelin Endothelial Signaling Pathway	0	0.0087	#NUM!	MTOR
Cardiac Hypertrophy Signaling (Enhanced)	0	0.0103	1.342	MTOR,PDE2A,PDK1,PRKAR2A,RPS6KA5
T Cell Exhaustion Signaling Pathway	0	0.0114	#NUM!	MTOR,PDK1
Systemic Lupus Erythematosus In B Cell Signaling Pathway	0	0.0109	#NUM!	MAVS,MTOR,TLR3
Senescence Pathway	0	0.0145	0	MTOR,NBN,PDK1,RPS6KA5
White Adipose Tissue Browning Pathway	0	0.00775	#NUM!	PRKAR2A
HOTAIR Regulatory Pathway	0	0.0126	#NUM!	LAMTOR5,YY1
Hepatic Fibrosis Signaling Pathway	0	0.00815	#NUM!	MTOR,PDK1,PRKAR2A
Calcium Signaling	0	0.00971	#NUM!	CAMK1,PRKAR2A
GM-CSF Signaling	0	0.0143	#NUM!	RUNX1
Ephrin Receptor Signaling	0	0.0111	#NUM!	PXN,WIPF1

## Sheet: UpstreamRegulators
Figure 5 - Source Data 3
© 2000-2020 QIAGEN. All rights reserved.
Upstream Regulator	Expr Log Ratio	Molecule Type	Predicted Activation State	Activation z-score	p-value of overlap	Target Molecules in Dataset
CLPP		peptidase	Inhibited	-5.396	3.54e-29	ACADM,ACADS,ACADVL,ACO2,ALDH2,ALDOA,ATP5F1A,ATP5F1B,CS,CYC1,DECR1,DLST,ECH1,ETFA,ETFB,ETFDH,HADH,HADHA,HADHB,HSPA9,HSPD1,IDH2,LONP1,MDH2,OGDH,PHB,PHB2,PRDX3,SDHB,SLC25A4,TKT,TUFM,UQCRC1
MAPT		other			1.62e-23	AARS1,ACAT1,ACO2,ACTR1A,ALDOA,ANXA6,AP1B1,ATP5F1A,ATP5F1B,ATP5PD,ATP6V0D1,ATP6V1A,ATP6V1E1,CCT8,CLASP2,CLTA,CLTC,CORO1A,COX5A,CS,CTSD,DCTN1,DPYSL2,DYNC1H1,EEF1G,EEF2,EPRS1,FBL,Fus,GDI2,GMPS,GSTP1,HK1,Hnrnpa3,HSPD1,HSPE1,KLC1,LRP1,MTOR,NAPA,NAPG,NDUFS3,NDUFS8,NDUFV2,OGDH,PDE2A,PGAM1,PKM,PPP3R1,PRDX3,SEC31A,SNAP25,STMN1,TLN1,TOP2B,TPM3,TPT1,TUBA1B,TUBB,TUBB4B,TUFM,UQCRC2,VAMP2,YWHAE,YWHAZ
TP53		transcription regulator	Activated	2.061	3.01e-22	ACAA2,ACADM,ACADS,ACADVL,ACAT1,ACO2,ACP2,ACSF2,ACTL6A,AHCY,ALDH9A1,ALDOA,ANXA6,AP1B1,AP3B1,APEX1,API5,ARHGAP5,ARPC1B,ATP5F1A,CASP8,CAT,CLTA,CLTC,COPB1,CORO1A,COX5A,CPSF1,CS,CTSB,CTSD,CTSF,CTSH,DBT,DCTN2,DDX5,DEK,DLST,DNM2,DNMT1,ECH1,EEF1A1,EIF4A1,EIF5,ETFA,FAM120A,FAM3C,FBL,FEN1,FKBP3,FUBP1,G6PD,GABPA,GJA1,GLB1,GNL3,GOLGA4,GSTP1,H1f5,HADH,HADHA,HADHB,HDAC2,HDLBP,HK2,HMGB2,HNRNPA2B1,HSPD1,IDH2,IFI…
MYC		transcription regulator		-1.624	1.26e-17	ABCD3,ABCE1,ACAT1,AHCY,ALDOA,ANXA6,APEX1,ARF3,ARHGAP25,BIN1,BRD2,CAD,CASP8,CNP,COX6B1,CTSB,CTSD,CTSV,DDX21,DDX39B,DDX5,DEK,DNMT1,EEF2,EFTUD2,EIF2S1,EIF4A1,ELAVL1,EXOSC8,FBL,FECH,G6PD,GAA,GCLC,GDI2,GJA1,GLG1,GLUD1,GLYR1,GM2A,GOLGA2,GTF2F2,HDAC2,HK2,Hnrnpa1,HNRNPA2B1,HNRNPAB,HNRNPH1,HNRNPU,HSPA9,HSPD1,HSPE1,IDH2,IFI35,IKZF1,ITGAM,LAMP1,LAMP2,LGMN,Macf1,METAP2,MOGS,MSH2,Mt1,MYBBP1A,NAP1L1,NARS1,NBN,…
CST5		other	Activated	5.337	3.63e-15	ANXA6,AP3B1,AP3D1,CEP170,CORO1A,CTSB,DDX21,DECR1,DHX9,EBNA1BP2,EDC4,EEF1D,EEF1G,GNL3,GOLGA2,HNRNPA2B1,HNRNPC,HNRNPH1,HNRNPU,JMJD1C,MAP1S,MVP,NCBP1,NCL,NOP10,NOP2,NUMA1,NUP107,NUP98,PRPF8,PUF60,PYGB,RSL1D1,RUNX1,SPOUT1,SRSF1,SRSF4,SSRP1,SURF6,TARDBP,TBL3,UTP14A,VARS,VTI1B
HNF4A		transcription regulator	Activated	3.191	3.99e-14	ABCE1,ACAA2,ACAT1,ACIN1,ACO2,ACOX3,ACP2,ACTR1A,ACTR3,ACY1,Akr1b7,ALDH2,AP3B1,APEH,ARFGAP1,ASAH1,BAZ1B,BCLAF1,C11orf54,CAT,CBX3,CBX5,CCT8,CDC5L,CHERP,CLTA,COMMD9,COPB1,COPB2,COPZ1,CRYZ,CRYZL1,CS,CTSA,CTSB,CTSZ,DBT,DDX39B,DIS3,DLST,EFTUD2,EIF5,ELMO1,ETFDH,FEN1,FKBP3,G6PD,GABPA,GATD3A/GATD3B,GNL3,GNS,GOLGA2,GOLGA4,GPLD1,GSPT1,GUSB,HAAO,HADHA,HADHB,HEXA,HMGB2,HNRNPA0,HNRNPC,HSD17B4,HSPE1,HTRA2,KARS1,…
MMP3		peptidase		-1.225	5.08e-14	CAPRIN1,CPSF6,CSTF3,DDX46,EFTUD2,Hnrnpa1,PRPF31,RBM14,Rbm25,RBM39,SAFB,SF3A1,SF3A3,SF3B1,SF3B4,SFPQ,Srrm1,SRSF1,SRSF3,SUPT6H,TARDBP,TFIP11,THOC6,TOP1,TRA2B,WDR33
TFEB	0.169	transcription regulator	Activated	3.967	8.68e-13	ARSB,ATP6V1A,ATP6V1B2,ATP6V1C1,CLCN7,CTSA,CTSB,CTSD,CTSF,GALNS,GBA,GNS,HEXA,LAMP1,PSAP,TPP1
PTP4A1		phosphatase		-1.688	9.35e-13	AARS1,ACTR2,ACTR3,AHCY,ALDOA,ARHGDIA,CLTC,DDX5,EEF1A1,EEF2,ELAVL1,GDI2,GMPS,GSTP1,HNRNPH1,NOP56,PCNA,PKM,PPP1R12A,RAN,RUVBL1,RUVBL2,SRSF3,STMN1,TAGLN2,TKT
CD3		complex		0.029	2.98e-11	AARS1,ACADS,ACTR3,AP1B1,BRK1,CASP8,CLIP1,COPB2,CORO1A,COX5A,CS,CYC1,DOCK2,EXOSC8,FBL,FKBP3,G6PD,GDI2,GTPBP4,HDAC2,HMGN1,HNRNPA2B1,HSPE1,IFI35,IL16,LAMP1,LCP1,LONP1,LRP1,MACROH2A1,MBD1,MDH2,MTA2,NAGA,NCL,NIT1,NPM1,OGDH,P4HB,PAFAH1B3,PCBP2,PCNA,PGAM1,PHB,PHB2,POLR2A,POLR2B,PPIL2,PSAP,RARS1,RBPJ,RPS14,SLC25A5,SRSF1,SRSF7,SSB,STMN1,TARDBP,TERF2,TGM2,TMPO,TRA2A,YY1
RICTOR		other	Inhibited	-4.439	4.63e-11	ATP5F1A,ATP5F1B,ATP5PD,ATP6V0D1,ATP6V1A,ATP6V1B2,ATP6V1C1,ATP6V1E1,ATP6V1G1,COX5A,COX6B1,CYC1,NDUFA7,NDUFS1,NDUFS3,Ndufs5,NDUFS8,NDUFV1,NDUFV2,NDUFV3,PRKCB,PSMA1,PSMB3,PSMD4,PXN,RPL12,RPL4,Rplp1 (includes others),RPLP2,RPS10,RPS2,RPS21,RPS5,RPSA,SDHB,UQCRC1,UQCRC2
MYCN		transcription regulator		1.666	5.82e-11	ABCD3,ABCE1,ALDOA,APEX1,ARPC1B,CAD,EEF1A1,EEF1D,EEF1G,EEF2,EIF3C,EIF4A1,HDAC2,HK2,HSPD1,MYH9,NBN,NCL,NPM1,NUCB1,PDK1,PHB,PHGDH,RPL12,RPL27,RPL37A,RPL4,RPLP2,RPS12,RPS2,RPS5,TGM2,TUBA1B,TUBB,TUFM,WDR5,YY1,ZEB2
mir-122		microRNA		-1.999	7.44e-11	ACTR1A,ALDOA,BCAT2,CS,CTCF,G6PD,GNPDA2,KHDRBS1,KIF5B,LETM1,LMNB2,NPEPPS,PKM,PXN,RAD21,RCC2,SEPTIN2,SF3B4,TGM2,TPD52L2,WARS1
LONP1	0.413	peptidase		-1.2	1.15e-10	ACADS,ACAT1,ATP5F1A,COX5A,ETFB,GARS1,GLUD1,HNRNPA2B1,HSPA9,HSPD1,HSPE1,MDH2,OXCT1,P4HB,PGAM1,SARS1,TPM3,TRAP1,TUFM
PLA2R1		transmembrane receptor	Activated	3.42	2.43e-10	ALDH2,ATP5F1B,ATP5PD,CTSA,CTSD,DPYSL2,LAP3,NDUFS3,SDHB,SQOR,TGM2,TPP1
INSR		kinase	Activated	5.132	3.04e-10	ACAA2,ACADM,ACADS,ACADVL,ACO2,ALDH2,ALDH6A1,ARHGDIA,ATP5F1A,ATP5F1B,ATP5PD,CDC5L,CORO1A,CS,CTSB,CTSV,CYC1,DECR1,DEK,ECHS1,ETFA,ETFB,ETFDH,FEN1,GRN,HADHA,HADHB,HSD17B10,HSD17B4,HSPD1,LCP1,MBD1,MCM2,MCM4,MDH2,MSH6,NDUFV2,OGDH,PSPC1,RAB7A,RUVBL2,SCP2,SURF6,UQCRC1,UQCRC2
PSEN1		peptidase	Inhibited	-2.607	6.55e-10	ACO2,ALDOA,ATP5F1A,ATP5F1B,ATP5PD,ATP6V1A,ATP6V1E1,CLTA,CLTC,CS,CTSC,CTSD,CTSS,CTSZ,DPYSL2,EEF1G,FBL,Fus,GDI2,GJA1,GSTP1,HK1,Hnrnpa3,HSPD1,HSPE1,KIF5B,LRP1,MTOR,PGAM1,PKM,RBPJ,SNAP25,STMN1,TOP2B,TPM3,TPT1,TUBA1B,TUBB,TUBB4B,TUFM,VAMP2,WARS1,YWHAE,YWHAZ
E2F1		transcription regulator		0.406	1.98e-09	ACTR1A,ACTR3,BUB3,CASP8,CBX5,CD2AP,COX5A,CTSB,DDX1,DDX39B,DNMT1,EIF3I,ERH,FEN1,FKBP3,GM2A,HADHA,HMGB2,HMGN1,HNRNPK,HSPD1,HSPE1,MCM2,MCM4,MDC1,MSH2,NCL,OGT,PCNA,PDK1,PHB,PPM1G,PRPS2,RAB1A,RAN,RCOR1,RRP1B,RSL1D1,RUVBL1,SAFB,SMARCA5,SRSF1,STMN1,TOP2B,TRAP1,TRIM28,VRK1,XRCC1,YWHAE,ZNF22
Cdc42	0.15	enzyme	Activated	3.051	2.51e-09	ATP6V1A,CTSA,CTSB,CTSD,CTSH,CTSS,CTSV,CTSZ,LAMP1,LAMP2,MYH9,NPC2,STMN1
TLE3	-0.236	other			2.75e-08	ACAD9,ATP5F1A,ATP5F1B,ATP5PD,CYC1,ETFA,ETFB,ETFDH,NDUFA7,NDUFS1,NDUFS3,Ndufs5,NDUFV1,NDUFV2,NDUFV3,UQCRC1,UQCRC2
MAP4K4		kinase	Inhibited	-4.472	4e-08	ACAA2,ACADS,ACADVL,ACO2,BCAT2,CYC1,DLST,HADH,HADHA,HADHB,HMGCL,MPI,NDUFS1,NDUFS8,NDUFV1,OGDH,PGAM1,PRKAR2A,SCP2,UQCRC1
MMP12		peptidase			1.66e-07	ACTR2,ACTR3,ARPC1B,FSCN1,KIF5B,MYH9,NPEPPS,PKM,PSAP,PSMA1,TLN1,TPM3,YWHAG,YWHAH
RPS15	-0.087	other			5.46e-07	EIF2S1,EIF3I,EXOSC1,EXOSC3,EXOSC6,EXOSC8,FEN1,MCM2,MCM4,PCNA,RPA1,RPS5
APP		other	Activated	2.327	6.93e-07	ABCD3,ACO2,AIFM1,ALDOA,ANXA6,ATP5F1A,ATP5F1B,ATP5PD,ATP6V0D1,ATP6V1A,ATP6V1E1,BIN1,BRD2,CAT,CLTA,CLTC,COX5A,CS,CTSB,CTSD,CTSV,CYFIP1,DPYSL2,ECH1,EEF1G,FBL,Fus,GDI2,GSTP1,HARS1,HK1,Hnrnpa3,HSPD1,HSPE1,IFI35,ITGAM,LRP1,Mt1,MTOR,NAPG,NDUFS8,PDK1,PGAM1,PKM,PRKAR2A,PRKCB,RAN,RBPJ,SMARCA2,SMARCA4,SNAP25,SSRP1,STMN1,TLR3,TOP2B,TPM3,TPP1,TPT1,TUBA1B,TUBB,TUBB4B,TUFM,VAMP2,VRK3,WNK1,YWHAB,YWHAE,YWHAZ,ZFHX3
SMYD1		transcription regulator			8.54e-07	ACO2,ATP5F1A,CYC1,HK2,Ndufs5,NDUFV1,OXCT1,PKM,PYGB,TKT,UQCRC1,UQCRC2
TCR		complex		1.112	1e-06	ABCD3,ALDOA,ATP5F1B,ATP5PD,BIN1,CS,CTSB,EBNA1BP2,ECH1,FBL,GLUD1,HADH,HSD17B10,HSPA9,HSPD1,IDH2,IL16,LAMP1,LBR,LMNB1,MDH2,P4HB,PDE3B,PGAM1,PHB,PHB2,PXN,RPL4,RPS2,RPSA,RUNX1,SCARB2,SNRPD3,TLR3,TUFM,UQCRC1
ESR1		ligand-dependent nuclear receptor		-1.054	1.33e-06	ACTR2,AKT1S1,AP3B1,APEX1,ARFGAP1,ATP6V0D1,ATP6V1A,BCLAF1,BIN1,BUB3,CAMK1,CCAR1,CDC5L,CEP135,CEP250,COPA,COPG1,COPZ1,CSAD,CTSB,CTSC,CTSD,CTSS,CYFIP1,DDX17,DDX21,DECR1,DNM2,EEA1,EP300,FLOT2,G6PD,GIT2,GJA1,GLB1,GM2A,HPGDS,HSD17B4,HSPD1,HTRA2,KHDRBS1,KIF5B,LEMD3,M6PR,NCF2,NUCB1,NUP210,NUP214,OPA1,PAK2,PCNA,PES1,PHB,PHB2,PPP1R12A,PRPF40A,PSIP1,RAB31,RAB6A,RAD21,RBM22,RENBP,RPS6KA4,SAMHD1,SCARB2,SEC31A…
RRP1B	-0.344	transcription regulator			1.58e-06	EIF3H,EP300,FEN1,ITGB2,MCM2,MCM4,PCNA,RPA1,RPL27,RPL37A,Rplp1 (includes others),RPS10,RPS14,RPS5,RRP1B,SERPINE2,TUBG1
PTEN		phosphatase		0.686	2.21e-06	ACAA2,ACO2,APOBR,ARHGAP5,ARHGDIA,ATP5F1A,CAD,CLTA,CLTC,COX5A,CS,CSTF3,CTSB,CTSV,CTSZ,DENR,G3BP1,GSPT1,HADH,HADHA,HADHB,HEXB,HMGN1,IDH2,LAMP1,LAMP2,MACROH2A1,MTOR,NBN,NDUFS3,NOP2,OGT,PARP1,PCBP2,PFKL,PHGDH,POLD2,PRKCB,PRXL2B,PXN,RANGAP1,RBBP6,RCC1,RUNX1,SDHB,SEC23A,SMARCA4,SNRPF,SNX2,SQOR,SRSF1,SUCLG2,TOM1
MKNK1	0.133	kinase	Activated	2.5	2.28e-06	AP3D1,DCTN1,EEF1D,HADHA,HSD17B4,KLC1,PTBP1,RAB14,RNH1,SFR1,SNAP25,TP53BP1,TPP1,USO1,VAMP2,YWHAG
KRAS		enzyme	Activated	2.891	7.87e-06	ACTR3,ACY1,ALDOA,CAD,CAMK1,CBX5,CS,DNMT1,DPYSL2,EEF1A1,EIF5,FLOT2,G6PD,GBA,GCLC,GJA1,GRN,HADHB,HEXA,HK2,HSPE1,HYOU1,ITGAM,ITGB2,LAMP1,LAMP2,LMNB1,NCF2,NCL,NPC1,NSF,NSUN2,PALD1,PFKL,PKM,RAB7A,RBM7,RNH1,RPSA,SAMHD1,SERPINE2,TCERG1,TCOF1,TRMT2A,UQCRC2,VAPA,VPS35,XRN2
IL3		cytokine		0.981	1.86e-05	ALDH2,Brd4,CAT,ECH1,EEF1A1,FKBP3,HK1,HK2,HNRNPA2B1,HSPA9,IK,ITGAM,MAN2B1,Mt1,NARS1,NCL,PFKL,PHGDH,PPM1G,PSMB3,RAN,RARS1,RBPJ,RPL4,RPS12,RPS14,SH3BP1,SNRPD2,WNK1,YWHAG,ZBTB7A
IL4		cytokine		1.659	2.16e-05	ACP2,ALDH2,ANXA6,ARSB,BCAT2,BIN1,CAD,CAT,CBX3,CCDC86,CELF2,CHD4,CLIP1,CLTC,CTSC,DCTN1,DDX42,DDX46,DECR1,DYNC1H1,EBNA1BP2,EEA1,EIF2S1,EIF4A1,EPRS1,FBL,FSCN1,GCN1,GJA1,HK2,HTRA2,IL16,ITGB2,KCTD12,LAMP2,LRP1,LRPPRC,MSH2,MYH9,NAP1L1,NCBP1,NCL,NUMA1,NUP214,PDK1,PDS5A,PEX14,PFKL,PHB,PPM1G,PPP6C,RCC1,SEC31A,SMC3,SNRNP200,Snrpa (includes others),SON,Srrm1,Srrm2,SYMPK,TGM2,TLN1,TPD52L2,UQCRC1,USO1,VARS,VP…
WT1		transcription regulator		-0.836	2.38e-05	AHCY,CAPRIN1,CD2AP,CDC73,CIRBP,CTSV,ETFA,HDLBP,HNRNPL,ITGAM,LMAN1,LRP1,NUCB1,NUP98,PCK2,RBPJ,SEC13,SMAD3,SMC1A,SRSF6,TARDBP,TCOF1,TRAP1,WARS1
miR-1-3p (and other miRNAs w/seed GGAAUGU)		mature microRNA		-1.272	2.75e-05	AP3B1,AP3D1,ARCN1,ARF3,ARID1A,ATP6V1B2,CTSC,DDX5,DHX15,G6PD,GJA1,GNPDA2,HPS4,LRP1,MEF2A,PICALM,POM121/POM121C,PTBP1,TAGLN2,TPM3,TWF1
NR4A1		ligand-dependent nuclear receptor	Inhibited	-3.369	2.9e-05	ACO2,ALDOA,ATP5F1A,ATP5F1B,COX6B1,DLST,EP300,G6PD,HK2,IDH2,IL16,MDH2,Mt1,NDUFA7,NDUFS1,NDUFS8,NDUFV3,OGDH,PCK2,PCNA,PDK1,PFKL,PRPS1,PRPS2,SMAD3,SUCLG2
PHF12		transcription regulator	Activated	2.121	3.45e-05	EIF3A,EXOSC6,GTPBP4,NOP2,PES1,PRPF31,SURF6,TBL3
RAB1B	0.32	other	Activated	2.126	3.45e-05	COPG1,GOLGA2,GOLGA3,GORASP2,NAPA,RRAGC,SEC31A,USO1
PPARA		ligand-dependent nuclear receptor	Activated	2.851	4.43e-05	ABCD3,ACAA2,ACADM,ACADS,ACADVL,ACAT1,AHCY,Akr1b7,ALDH2,ALDH3A2,ALDH9A1,APEX1,ARHGDIA,ATP5F1B,CAT,CS,CSAD,DECR1,ECH1,EP300,ETHE1,G6PD,GLUD1,GSTP1,H1-2,HADH,HADHA,HADHB,HMGN1,HSD17B10,HSD17B4,NCF2,PCNA,RTN4,SCP2,TPP1,UQCRC1
HBA1/HBA2	-0.409	transporter	Activated	2.333	4.8e-05	CYC1,Mt1,NDUFA7,NDUFS3,NDUFS8,NDUFV1,NDUFV2,UQCRC1,UQCRC2
EGFR		kinase		-1.112	5.16e-05	ACY1,CAD,CBX5,CCAR1,CST3,GJA1,GRN,HK2,HNRNPA2B1,HNRNPH1,HNRNPK,HSPE1,MTA2,NCL,NSF,NSUN2,PCNA,PDK1,PKM,PSMB3,RUNX1,SDHB,SERPINE2,SRSF1,TCERG1,TCOF1,TGM2,TOP1,TRMT2A,TUBB4B,TUBG1,UQCRC2,XRN2,ZEB2
XBP1		transcription regulator	Activated	4.51	5.21e-05	ARCN1,CAT,COPB1,COPB2,COPG1,COPZ1,GOLGA3,GOLGA4,GOLPH3,GORASP2,HYOU1,LMAN1,MOGS,P4HB,RPN2,SEC23A,SEC23B,SEC31A,SMC3,SRP68,TOP1,USO1,VAMP2
MTOR	1.866	kinase		0	7.48e-05	ACADM,AIFM1,CASP8,CLTC,CNP,CS,CTCF,DCTN1,EIF3A,EPRS1,ETFA,GLG1,GLUD1,HADHA,HADHB,HK1,HK2,MDH2,MTOR,NSUN2,PCNA,PKM,PRKAR2A,PTBP1,PYGB,RPL12,SMPD1,SND1,STX12,UQCRC2
NUP107	-0.322	other		-1.964	7.88e-05	NUP133,NUP214,NUP98,TPR
FOLR1		transporter			8.66e-05	ABCE1,ATP6V1B2,BCAT2,CAT,CELF2,DNASE2,GBA,IK,NAP1L1,SMARCE1,SNRPF,ST3GAL6,TAGLN2
Esrra		transcription regulator		0.637	8.68e-05	ACADM,ACAT1,ALDOA,ATP5F1B,COX5A,CYC1,ECH1,GABPA,NDUFS3,OXCT1,PCK2,PDK1,PFKL,SDHB
TFAM	0.449	transcription regulator		0.816	9.29e-05	ACADM,ACADS,ECH1,ECHS1,HK1,PGAM1
UCP1		transporter	Activated	2.902	9.63e-05	AARS1,BCAT2,CTSV,DBT,EEF1A1,G6PD,GARS1,GOLM1,GREM2,NDUFS3,PCK2,PHGDH,PHYHD1,SDHB,SND1,TLR3,UQCRC1,UQCRC2
NFE2L2		transcription regulator		1.661	0.000148	ALDOA,CAT,CREG1,CS,CTSD,DCTN3,DDX39B,EIF2S1,EIF3C,G6PD,GCLC,GSPT1,GSTP1,HSPA9,HYOU1,LMNA,M6PR,MOGS,Mt1,NARS1,NCF2,OGT,PHGDH,PRKCB,PSMA1,PSMB3,PSMD4,RAN,RARS1,RUVBL1,SEC23A,Snrpa (includes others),TKT,USO1
PPARGC1A		transcription regulator	Activated	3.77	0.000152	ACADM,ACADVL,ACAT1,ATP5F1A,ATP5F1B,ATP5PD,BCAT2,CAT,COX5A,CS,CTSC,GABPA,HK2,HMGCL,MCM4,MDH2,NDUFS1,NDUFS8,NDUFV1,NDUFV2,OXCT1,PACSIN2,PCK2,PGAM1,PRDX3,SDHB,SERPINE2,UQCRC2,VAMP2
TRPC4AP		transporter		1	0.000153	FBL,HSPD1,NOP56,NPM1
PNPLA2		enzyme	Activated	2.096	0.000161	ACAA2,ACADM,ACADS,ACADVL,ACO2,CS,EP300,IDH2,SUCLG2
SRSF1	-0.269	other			0.000174	HNRNPH1,HNRNPL,LMNA,PTBP1,SRSF1,SRSF6,SRSF7
PRL		cytokine	Activated	2.648	0.000174	ACTR3,ARF3,ATP5PD,CAMK1,CST3,CTSA,CTSB,CTSD,CTSH,CTSS,CTSV,DDX39B,HSPD1,IFI35,MFGE8,P4HB,PCNA,RPSA,SAMHD1,SCP2,SND1,SP110,TPM3,TUBA1B,YWHAG
TGFB1	0.28	growth factor		1.75	0.000187	ABCE1,ACAA2,ALDH2,ALDH3A2,ALDOA,ARPC2,BIN1,CAPRIN1,CASP8,CAT,CELF2,CHD4,COX5A,CST3,CTCF,CTSB,CTSC,CTSD,CTSH,CTSS,CYC1,DDX21,DDX5,DDX6,DNMT1,DOCK2,EEF1A1,ELAVL1,ELMO1,EPRS1,FAM3C,FLI1,FSCN1,FUBP1,GARS1,GATD3A/GATD3B,GCLC,GJA1,GNS,GUSB,HADH,HDAC2,HEXA,HEXB,HK1,HK2,HNRNPAB,HNRNPC,HNRNPH1,HSD17B10,INPP5D,ITGAM,ITGB2,LAMP2,LBR,LEMD3,MAD1L1,MAVS,MBD1,MCM2,MSH6,MYH9,NCF2,NIT1,NRBP1,NUP62,PCCB,PCNA,PFKL,…
RTN4	0.371	other		-1.066	0.000188	ACTR1A,Ap2b1,ARHGDIA,DPYSL2,DYNC1H1,LAP3,RTN4,YWHAB,YWHAG
MAX	-0.202	transcription regulator		0.762	0.000205	APEX1,CAD,CBX5,GLYR1,HDAC2,HK2,LAMP2,NCL,NPM1,PDK1,RCC1,YY1
PCGEM1		other	Activated	2.616	0.000214	ALDOA,CS,G6PD,GLUD1,HK2,IDH2,OGDH,PKM
NUP133	-0.304	other			0.000243	NUP107,NUP98,TPR
FN1		enzyme		1.121	0.000284	ACTR2,AHCY,CORO1A,CTBP1,CTSD,G3BP1,GDI2,HK1,ITGAM,LAMP1,MTOR,PCNA,PTBP1,PXN,SEC23B,SMARCA4,TGM2,U2AF2,YWHAZ,ZBTB7A
Hbb-b1	-0.178	transporter	Activated	2.309	0.000311	CYC1,IL16,ITGAM,Mt1,NCF2,NDUFA7,NDUFS3,NDUFS8,NDUFV1,NDUFV2,UQCRC1,UQCRC2
ADORA2A		G-protein coupled receptor		1.291	0.00034	ARF3,ATP6V1B2,EEF2,FBL,Fus,GPLD1,HNRNPK,KIF5B,KLC1,NAPA,P4HB,PGAM1,PPP3R1,RAB6A,SSRP1
SFPQ	-0.324	transcription regulator	Inhibited	-2.438	0.000388	ACIN1,CHERP,HNRNPU,KARS1,SF3B3,U2AF2,U2SURP
KLF3	-0.772	transcription regulator		-0.962	0.00039	ANXA6,CIRBP,CTSC,ELMO1,EPRS1,GALNT1,GIT2,GSTP1,HEXB,HNRNPH1,MAP1S,NDUFV3,NELFB,NSUN2,PPM1G,RAB7A,RAVER1,RPS6KA5,RUVBL1,SCP2,SMAD3,SMCHD1,SNX2,TMPO,TPM3,VPS16,ZEB2
mir-451		microRNA		-0.271	0.000407	CELF2,PPP6C,RAB14,YWHAZ,ZNF148
IL15		cytokine	Activated	2.63	0.000421	ACADS,ALDOA,Brd4,BRK1,COPB2,CORO1A,EXOSC8,G6PD,GARS1,GDI2,HK1,HK2,HNRNPA2B1,HSPE1,IFI35,LAMP1,MACROH2A1,MTA2,NAGA,PAFAH1B3,PCBP2,PCNA,PDK1,PFKL,PKM,PPP6C,PSAP,RBPJ,SLC25A5,SMAD3,SRSF7,TKT,YY1
KDM8		enzyme		1.51	0.000426	ALDOA,CS,G6PD,HK2,IDH2,MCM4,PCK2,PDK1,PKM,PRPS1
miR-30c-5p (and other miRNAs w/seed GUAAACA)		mature microRNA		-0.277	0.000465	ATRX,FRG1,GALNT1,HNRNPM,LMNB2,NAPG,NCL,NUCB1,PPP3CA,PPP3R1,PRPF40A,SEC23A,STX7
LCK		kinase		-1.961	0.000479	FBL,ITGB2,NOP10,RPL4,RPS27L,RUNX1,SFPQ,TCOF1,UTP14A,XRN2
CDK4/6		group		-0.632	0.000479	BCLAF1,EIF5,FAM120A,G3BP1,NOP2,TUBA1B,TUBB,TUFM,YLPM1,ZNF148
HTT		transcription regulator		1	0.000507	ACADM,ALDOA,ATP5F1A,ATP5F1B,CBLN1,CBX5,CPSF2,CTSD,CYC1,DBNL,DLST,EEF1A1,EEF2,EP300,GCLC,HMGB2,HSPA9,HSPD1,HSPE1,HTRA2,MDH2,MOBP,Mt1,MTOR,NDUFA7,NDUFS3,NSF,PCNA,PDK1,POLR2A,PPP3CA,PRKCB,PTBP1,RPS6KA5,SART1,SDHB,SFPQ,SNAP25,STAU1,STMN1,STX12,TGM2,TRAP1,TUBB,VAPA,VTI1B,YWHAG
miR-16-5p (and other miRNAs w/seed AGCAGCA)		mature microRNA	Inhibited	-3.371	0.000559	ACP2,ACTR1A,ARHGDIA,CAPRIN1,GOLGA5,GRN,HARS1,LAMTOR3,LAMTOR5,MSH2,NAPG,OGT,PDCD6IP,RARS1,RTN4,SERPINE2,TPM3,VTI1B,WIPF1
NUBPL	0.373	other			0.000589	NDUFS1,NDUFS3,NDUFV1
RB1	0.09	transcription regulator	Activated	3.572	0.000633	ACO2,ATP5F1A,CASP8,CBX5,CMAS,COX6B1,DEK,DLST,DNMT1,FEN1,GMPS,HMGB2,MCM2,MCM4,MTOR,NDUFV1,NIT1,OGT,OPA1,PARP1,PCNA,RSL1D1,SAFB,SDHB,SMARCA5,TMPO,TUBG1,UQCRC1,VRK1,YWHAE,ZEB2,ZNF638
QKI		other		1.89	0.000656	CLTA,CLTC,HNRNPH1,LAMP1,LAMP2,MACROH2A1,SNX2
mir-144		microRNA		-0.156	0.000715	CELF2,PPP6C,RAB14,YWHAZ,ZNF148
FLT1		kinase		1.897	0.00102	ACTR2,AHCY,CTBP1,G3BP1,GDI2,HK1,LAMP1,PTBP1,SMARCA4,YWHAZ
VEGFA		growth factor		1.919	0.00111	ACADM,ALDH2,BCAT2,COX6B1,CST3,CTSB,CTSS,CTSV,DBT,DECR1,ETFA,GJA1,HK1,INPP5D,KARS1,LMNA,MDH2,MVP,PARP1,PCNA,RUNX1,SDHB,SLC25A5,TUFM
Sos		group			0.00122	ADNP,AGPS,CAT,CLIP1,EEA1,GBA,GIT2,GM2A,HPGDS,HSD17B10,KIF5B,Macf1,MYH9,PRPF4B,RUNX1,STMN1,TPP1,YWHAZ
NRG1		growth factor		-0.45	0.00122	ACAT1,BIN1,EEF1A1,ELOA,ETFB,FSCN1,G3BP1,GLG1,HEXB,HK2,HNRNPK,ITGAM,ITGB2,NDUFS1,NUP214,PCCB,PHGDH,PXN,RUNX1,SART3,STMN1,TGM2
TRRAP	-0.301	transcription regulator			0.00133	MAD1L1,MCM4,NCL,PCNA
SRSF2	-0.276	transcription regulator			0.00141	EP300,HNRNPH1,HNRNPL,PTBP1,SRSF1,SRSF6,SRSF7
GRN	1.768	growth factor			0.00147	CTSD,CTSZ,GBA,GRN,TARDBP
MCM2	-0.971	enzyme			0.00158	LMNB2,MCM4
MCM4	-0.675	enzyme			0.00158	LMNB2,MCM4
GPR34		G-protein coupled receptor			0.00158	ITGAM,ITGB2
MCM3	-0.528	enzyme			0.00158	LMNB2,MCM4
ORC1		other			0.00158	LMNB2,MCM4
RECQL5		enzyme			0.00158	PARP1,XRCC1
TCOF1	-0.307	transporter			0.00194	BCLAF1,CAPRIN1,DDX42,Nolc1,PRPF40A,RBM10,RGPD4 (includes others),SAFB2,TERF2
MYCBP	-0.128	transcription regulator			0.00194	CAD,EIF2A,NCL
LDHB	0.194	enzyme			0.00194	ATP5F1A,ATP5F1B,COX5A
ALKBH5	-0.36	enzyme			0.00197	ASAH1,Brd4,CTSD,DNMT1,EEF1D,GJA1,H1f1,NCOR1,NONO,RPA1
CYP1A1		enzyme			0.00207	CBX3,COX6B1,ETHE1,LMNA,LMNB2,Mt1,NDUFV1,SDHB,SEPTIN2,SMARCA4,TMPO
ONECUT1		transcription regulator			0.00211	CCT8,COPB2,EIF4A1,ELOA,GABPA,HMGB2,HNRNPA2B1,HSD17B4,LUC7L3,PFKL,PHB2,PSMA1,RNF20,RPS6KA5,SAMHD1,SART3,SMARCC1,SNRPD2,SNW1,SUPT16H,TMF1,TSG101
mir-21		microRNA		-0.967	0.00221	ARCN1,CCT8,CD180,COPG1,FAM3C,FUBP1,HNRNPA2B1,INPP5D,KIF5B,MSH2,NMT1,PGAM1,SEPTIN2,SMARCA4,SRSF3,STMN1,STRAP,SUMO1,VRK1,YWHAB,YWHAZ,YY1
PLIN1		other			0.00238	ACADM,ACADVL,HADHA,HADHB
ESRRA		ligand-dependent nuclear receptor	Activated	2.014	0.00269	ACADM,ACADVL,ASAH1,ATP5F1B,CSAD,DEK,ETFDH,HADHA,HK1,HK2,HSD17B4,PCK2,PKM,SMARCA4,SMARCE1,TRA2B
KLF15		transcription regulator	Activated	2.61	0.00271	ACADM,ACADS,ACADVL,ACAT1,DECR1,HADHA,HADHB
H2AX	-0.38	transcription regulator		0.739	0.00272	ATP5F1A,EPDR1,MDC1,SDHB,TP53BP1,UQCRC2
CD40LG		cytokine		0.249	0.00275	ACY1,ANXA6,ARSB,BCAT2,CBX3,CELF2,CLIP1,CTSC,DCTN1,DDX42,DDX46,DECR1,EIF2A,EIF2S1,FBL,FSCN1,HK2,ITGAM,MSH2,NAP1L1,PEX14,PPIL2,RAD21,RCC1,SYMPK,TGM2,TPD52L2,TUBB
TCL1A		transcription regulator			0.00278	CTSB,CTSC,CTSD,CTSH,CTSS,GUSB,ITGAM,ITGB2,MAN2C1,SCARB2
TRAP1	0.343	enzyme	Inhibited	-2.55	0.00278	ATP5F1A,COX5A,GARS1,HSD17B10,HSPD1,HSPE1,MAVS,PKM,SARS1,SRSF1
MTBP		other			0.00301	CAD,NCL,NPM1
GADD45GIP1		other			0.00301	GCLC,HSPD1,LONP1
RAPGEF1		other			0.00307	EFTUD2,PXN,SNRNP200,SNRNP70
CUL4B	-0.217	other		-1.342	0.00314	EIF3I,HSPA9,PRDX3,PSMA1,RUNX1,TPM3
FOS		transcription regulator		-0.039	0.00342	ADNP,AGPS,AP3D1,CAT,CELF2,CLIP1,CPSF1,CTSB,CTSH,CTSV,DNMT1,EEA1,GBA,GIT2,GJA1,GM2A,GSTP1,HPGDS,HSD17B10,KIF5B,LAMP2,Macf1,MYH9,NCF2,PRPF4B,PSMB3,RNH1,RUNX1,SAP18,SEC23B,SERPINE2,SMARCD2,STMN1,TPP1,TUBB,YWHAZ
CDKN1A		kinase		1.024	0.00343	ATRX,BUB3,CTSB,GLB1,GRN,HMGB2,HNRNPA2B1,ITGAM,LBR,LUC7L3,MCM2,MCM4,NPM1,PCNA,PHGDH,PSAP,STMN1,YTHDC1
EPO		cytokine		0.196	0.00366	APOBR,ATP6V1B2,CREG1,CTSZ,EEF1A1,FECH,GBA,GSPT1,HMGN1,LCP1,MACROH2A1,NPM1,PCNA,PRKCB,RCC2,SMARCD2,SON,SSRP1,TOP1,TPT1,UPF1,WDR1
EIF2AK3		kinase			0.00379	AARS1,CTSC,EPRS1,HSPA9,LARS1,LONP1,NARS1,PCK2,SARS1,SNW1,WARS1
CD24		other		-1.508	0.00379	BCLAF1,FXR1,JMJD1C,LRPPRC,NIPBL,PDS5A,RBBP6,RSBN1,SFPQ,TPR,USO1
CDKN2A		transcription regulator	Activated	3.174	0.00381	DDX5,DEK,EEF1A1,FBL,FEN1,GLB1,GNL3,GSPT1,HMGB2,IFI35,LAMP1,MCM4,NPM1,PCNA,POLD2,SAE1,TMPO,TPP1,TRIM28,TSG101,VPS41,VRK1
HELLS		enzyme			0.0039	HSPD1,MCM4,PCNA,PDS5A
E2F4		transcription regulator			0.00395	ATRX,BRD2,BUB3,CBX5,EXOSC8,FEN1,KHDRBS1,MCM4,MSH2,NAP1L4,NCL,NPM1,PCNA,SFPQ,SMARCA5,STMN1,TMPO,TOP2B
NSUN6		enzyme		0.816	0.00411	FSCN1,HEXB,ITGB2,PHGDH,STMN1,TGM2
mir-210		microRNA		-0.777	0.00414	CLASP2,FAM3C,GIT2,IL16,MACROH2A1,NIPBL,NUP210,P4HB,PSAP,SMCHD1
YY1	-0.391	transcription regulator			0.00435	ABCE1,API5,Brd4,CBX3,FEN1,Hnrnpa1,HNRNPC,KIF5B,LMAN1,LMNB1,LUC7L2,MATR3,MCM4,PCNA,RAD21,SFPQ,SLC25A4,SRSF1,TGM2,TRA2A,YWHAE
AFF4	-0.284	transcription regulator			0.00439	HNRNPH1,PTBP1,SRSF6
mir-634		microRNA			0.00439	LAMP2,OPA1,RAB1A
AP3B1	0.832	transporter			0.00439	AP3D1,LAMP1,LAMP2
miR-122-5p (miRNAs w/seed GGAGUGU)		mature microRNA	Inhibited	-2.252	0.00451	ALDOA,CS,EEF1A1,FUBP1,P4HB,PKM,RAB6B,TPD52L2
PKM	0.19	kinase		0.667	0.00451	ALDOA,HK2,PCK2,PDK1,PKM,PRPS1,SDHB,UQCRC2
LAMTOR2	1.68	other			0.00461	LAMTOR1,LAMTOR3
APPL1	0.624	other			0.00461	SNAP25,VAMP2
BDNF		growth factor		1.082	0.00489	ALDH7A1,AP3D1,APEX1,DCTN1,EEF1D,EEF2,FSCN1,HADHA,HSD17B4,KLC1,PALD1,PCNA,PTBP1,RAB14,RNH1,RPL37A,SFR1,SNAP25,TP53BP1,TPP1,USO1,VAMP2,YWHAG
CIP2A		other		-0.164	0.00495	HK2,NCL,PDE2A,PDK1,PKM,RAB31,SERPINE2,SLC25A4
mir-1		microRNA		0.412	0.00501	CAPRIN1,DHX15,GATAD2A,GJA1,HNRNPU,HSPD1,NUP50,PICALM,SMARCA4,TAGLN2,TWF1
RCE1		peptidase			0.0053	ATP5F1B,GDI2,GJA1,LMNA,LMNB2,ZFR
CDK9	-0.318	kinase			0.00532	CAD,G6PD,HNRNPH1,NCL,PTBP1,RUNX1,SRSF6
PAX3		transcription regulator			0.00551	ALDH3A2,CST3,CTSA,EIF2S1,FUBP1,G6PD,GLB1,HARS1,M6PR,NPC2,PAK2,PCNA,PHGDH,RAB31,SRSF3,YWHAE
HOXA10		transcription regulator		-0.535	0.00589	CHERP,CTSV,EIF3A,FKBP3,GJA1,HDLBP,HNRNPL,IDH2,NCF2,NUP214,P4HB,PHGDH,RPL37A,YWHAG,ZNF22
STK11		kinase	Activated	2.236	0.00596	AHCY,ALDH9A1,ALDOA,COX5A,COX6B1,CS,CTSD,CYC1,DNMT1,EIF3A,MDH2,NDUFS8,NDUFV1,PCK2,PDE2A,PHGDH,PKM,POLD2,SDHB,TKT,UQCRC1
FUS		transcription regulator			0.00609	HSPA9,HSPD1,LONP1
PRKCI		kinase		-1.133	0.00611	COPB2,GMFB,HK1,HK2,SF3B1
miR-23a-3p (and other miRNAs w/seed UCACAUU)		mature microRNA		0.293	0.00721	GATD3A/GATD3B,LMNB1,MDH2,SMAD3
BID	-0.017	other	Activated	2	0.00721	CTSB,CTSD,CTSH,CTSS
NME1	0.191	kinase			0.00753	ACIN1,CTSD,EXOSC8,FBL,HNRNPA2B1,SF3A1
miR-483-3p (miRNAs w/seed CACUCCU)		mature microRNA		0.816	0.00753	GJA1,HNRNPA0,LBR,MDC1,PGAM1,RAN
PPARGC1B		transcription regulator	Activated	2.209	0.00764	ACADM,ACADVL,ATP5F1B,COX5A,CS,HK2,MCM4,NDUFV2
MAFF		transcription regulator			0.00812	GCLC,GSTP1,MOGS
MCU		ion channel			0.00897	ATP5F1A,UQCRC2
FLI1	-0.391	transcription regulator	Inhibited	-2.429	0.0103	DDX21,DNMT1,FLI1,INPP5D,Nolc1,NPM1,SNU13
IREB2		translation regulator			0.0105	ACO2,FECH,SDHB
RHO		G-protein coupled receptor		-0.64	0.0113	ACADM,CTSS,EIF2A,H1-2,HK2,HMGB2,Mt1
UCHL1	-0.068	peptidase		1.134	0.0113	ANXA6,DPYSL2,GIT2,GOLM1,HNRNPLL,RBM26,SCP2
Lh		complex		-0.522	0.0118	ACP2,ACTR2,GJA1,HK2,MBD2,NPC2,PHB,PPP3R1,PRKAR2A,PSIP1,RAB14,RAB1A,RAB31,RANGAP1,RUNX1,SMARCA4,SNAP25,TLN1
ING1	-0.425	transcription regulator		1.432	0.0118	ADNP,DEK,DIDO1,RPS14,TPT1
DYSF		other			0.0131	ACTR3,ARPC2,CTSH,CTSS,CTSV,LCP1,PRPF4B,PSAP
TSG101	0.438	transcription regulator			0.0133	PDCD6IP,STMN1,TSG101
ATF4		transcription regulator		1.831	0.0134	AARS1,APEX1,GARS1,HYOU1,LARS1,NARS1,PCK2,PHGDH,RBPJ,SARS1,TKT,WARS1,XRCC1
SAFB2	-0.266	other		-1	0.014	HEXA,PPP1R12A,SAFB2,UQCRC2
Integrinα		group			0.0146	ITGAM,ITGB2
ZC3H10		other			0.0146	ATP5F1A,SDHB
PHF6	-0.228	transcription regulator			0.0146	POLR2A,UBTF
GTF2H4		transcription regulator			0.0146	CAD,NCL
HK2	0.255	kinase			0.0146	SDHB,UQCRC2
BLOC1S6		other			0.0146	AP3D1,STX12
AGA		enzyme			0.0146	MCM4,TERF2
TFDP2		transcription regulator			0.0146	SMC1A,TOP2B
ORC2		other			0.0146	LMNB2,MCM4
SMARCC2	-0.344	transcription regulator			0.0146	NPC2,SMARCE1
MYCL		transcription regulator			0.0146	CAD,HSPD1
KDM5A	-0.269	transcription regulator	Inhibited	-2.714	0.0147	ACO2,ATP5F1A,COX6B1,DLST,MCM2,MTOR,NDUFV1,NIT1,OPA1,SDHB,UQCRC1
Insulin		group		1.442	0.0148	ACADM,ACAT1,ALDOA,CCT8,ETFA,G6PD,GCLC,GSTP1,HNRNPK,HSPA9,HSPE1,LONP1,MDH2,MTOR,NDUFS1,NDUFV1,NDUFV3,OGT,P4HB,PCCB,PCNA,PDK1,PKM,SDHB,SLC25A5,SRSF3,UBTF,UQCRC1,UQCRC2
PRNP		other		-0.524	0.0151	CTSD,EIF2S1,GJA1,HSPA9,LAMP2,LRP1,PDCD6IP,SNAP25
LMNB1	-0.561	other			0.0152	ATP5F1B,GDI2,GJA1,LMNA,LMNB2,ZFR
IGF1R		transmembrane receptor	Activated	3.53	0.0152	ACADM,ACADS,ALDOA,ATP5F1A,ATP5F1B,ATP5PD,CTSD,HADHA,IL16,ITGAM,NDUFV2,PKM,RAB1A,RPL37A,RPS21,RRAGC,SCP2,UQCRC1,UQCRC2
CD28		transmembrane receptor		0.137	0.0158	ACTR3,AP1B1,BIN1,CASP8,CLIP1,CS,CYC1,FBL,GTPBP4,HDAC2,HK2,HMGN1,LCP1,MACROH2A1,MBD1,NCL,PGAM1,PHB,PHB2,POLR2A,RPS14,SLC25A5,SSB
HEXIM1	-0.316	transcription regulator			0.0161	HNRNPH1,POLR2A,PTBP1,SRSF6
SATB1		transcription regulator		0.087	0.0161	CDK19,CTSD,IKZF1,IL16,ILF3,MEF2A,NCOR1,PRKCB,RUNX1,SMAD3,SUN2,TSG101,WARS1
CBS/CBSL		enzyme			0.0164	CSAD,EEF1A1,EEF1D
NFKBIA		transcription regulator	Activated	2.333	0.0175	ABCD3,CASP8,CTSB,CTSF,CTSZ,FSCN1,GATD3A/GATD3B,GM2A,GRN,HK2,Hnrnpa1,MFGE8,MSH2,Mt1,PCNA,PICALM,PLD3,RABEP2,RPS2,RPSA,SCFD1,SERPINE2,SH3GLB2,TMPO,TOLLIP,YWHAZ,ZNF638
DDIT3		transcription regulator		-1.414	0.0182	HSPD1,HSPE1,ITGAM,PCK2,PCNA,SARS1,SRSF1,SRSF6,TGM2,WARS1
26s Proteasome		complex	Inhibited	-2.644	0.0184	CLCN7,CTSA,CTSB,CTSD,CTSF,HMGB2,IFI35,LAMP1,PSAP,PSMB3,TGM2,VPS11
RBL2		other		1.234	0.0191	DNMT1,HADH,HCFC1,MTOR,NOP2,PCNA,PFAS,PPM1G,STMN1
NUPR1		transcription regulator	Activated	3.651	0.0192	API5,CHD4,DDX46,DIDO1,HK2,HNRNPA2B1,HNRNPM,IRF2BP2,LBR,LMNB1,MSH6,MYO18A,NAAA,NEK9,NSF,NUP50,PARP1,PDK1,PPWD1,RBM14,RPA1,SAFB,SAMHD1,SRSF1,TARDBP,TMPO,TOLLIP,TP53BP1,WNK1,ZNF512
mir-27		microRNA		1.044	0.0198	CAD,IKZF1,PDS5B,PHB,PSAP,RUNX1
SHC1		other		1.387	0.0198	FLI1,GSTP1,HMGB2,ITGAM,MEF2A,PCNA
SERTAD2		transcription regulator			0.0199	CAT,CYC1,ECH1
PSEN2		peptidase	Inhibited	-2.2	0.0203	ANXA6,ATP6V0D1,COX5A,CTSC,CTSS,CTSZ,GJA1,KIF5B,NDUFS8
H1-6		other		0	0.0209	MAN2B1,OGT,PCCB,PHB2,SF3A1,SMARCE1,ZC3H4,ZNF143
H1f1	-1.135	other		0	0.0209	MAN2B1,OGT,PCCB,PHB2,SF3A1,SMARCE1,ZC3H4,ZNF143
miR-124-3p (and other miRNAs w/seed AAGGCAC)		mature microRNA	Inhibited	-2.452	0.021	ACAA2,ALDH9A1,ARPC1B,DNM2,ERH,FCHO2,G3BP1,HADH,HADHB,LMNB1,MYH9,NEK9,PTBP1,SLC15A4,SUCLG2,TLN1
F Actin		complex			0.0213	CTSS,CTSV
EIF3M	0.063	other			0.0213	EIF3C,EIF3H
MBD4		enzyme			0.0213	MSH2,MSH6
SAG		other			0.0213	NSF,VAMP2
GNRH2		other			0.0213	RPLP2,RPSA
RNASEH2A	-0.248	enzyme			0.0225	CTSF,DDX21,DDX5,IFI35,TLR3
FOXO3		transcription regulator		1.796	0.0229	APEX1,CAD,CASP8,CAT,CTSB,CTSV,GCLC,ITGAM,ITGB2,LARS1,LEMD3,MCM2,MCM4,Mt1,PCNA,PDCD6IP,PDE3B,PRDX3,RTN4,RUVBL1,SH3GLB1
KITLG		growth factor		-0.64	0.0234	ATP6V1B2,CREG1,EEF1A1,GJA1,IK,IL16,NPM1,PKM,PRKCB,RCC2,SF3A1,SMARCD2,TPT1,UPF1,WDR1,ZNF207
PLIN5		other		-1	0.0237	ACAA2,ACADM,ACADVL,GCLC
ARNT		transcription regulator	Activated	2.2	0.0237	ALDH7A1,ALDOA,COX6B1,CTSD,G6PD,HK2,Macf1,NDUFS3,PCK2,RANGAP1
OMA1		peptidase			0.0238	ACADVL,OPA1,UQCRC2
DPH5		enzyme			0.0238	EEF2,EP300,SMAD3
miR-100-5p (and other miRNAs w/seed ACCCGUA)		mature microRNA			0.0238	MTOR,RPTOR,SMARCA5
IKZF1	-0.243	transcription regulator	Inhibited	-2.32	0.0241	ANKFY1,ARF3,FLI1,G6PD,GRN,HK2,HNRNPLL,LAP3,LGMN,LRP1,PFKL,PGAM1,RUNX1,SMAD3,SNX2,ST3GAL6,STX12
ZFHX3	-0.383	transcription regulator			0.0267	GSTP1,Rplp1 (includes others),RPLP2,RPS12,RPS14,SSB,TOP1,TUBA1B
miR-145-5p (and other miRNAs w/seed UCCAGUU)		mature microRNA		-1.796	0.0271	ACBD3,FLI1,FSCN1,LAMP2,PPP3CA,TPM3
MITF		transcription regulator		1.581	0.0278	ACO2,ASAH1,ATP6V1B2,ATP6V1C1,ATRX,CLCN7,GM2A,HPGDS,HPS4,MCM2,MCM4,MDC1,PPM1H,SNW1,ST3GAL6,STX7
ABCC8		transporter			0.028	ACADM,ACADVL,CAT
MYCBP2		enzyme			0.028	BAZ1B,PRKCB,SUMO1
MRE11	-0.328	enzyme			0.029	LMNB2,NBN
SCGB3A2		other			0.029	CTSD,CTSS
BCAR4		other			0.029	HK2,MTOR
MCM7	-1.13	enzyme			0.029	LMNB2,MCM4
SLC9A1		ion channel			0.029	HK2,PPP3R1
H4-16		other			0.029	GSTP1,RUNX1
GNMT		enzyme			0.029	NPC1,NPC2
Pde4d		enzyme			0.029	CTSV,ITGB2
FBXW7		enzyme	Inhibited	-2.449	0.0292	ATP5F1A,CS,DLST,ECHS1,HSPE1,PCCB
EDN1		cytokine		1.285	0.0292	ANXA6,CST3,GJA1,GRN,ITGAM,NPM1,PRKCB,PXN,RPSA,TGM2,TPM3,TPT1,UBTF,YWHAE
HSP90B1	0.109	other	Activated	2.236	0.0292	ARF3,ITGB2,RPL12,RPLP2,RPS14,VAMP2
HDAC5	-0.152	transcription regulator		1.192	0.0293	ACADM,ATP5F1B,CASP8,HK2,HMGCL,PFKL,RBBP6
GCK		kinase	Inhibited	-2	0.0299	ACADM,ATP5F1A,ECHS1,HADH
LLGL2		other		0	0.0299	FSCN1,HEXB,ITGB2,STMN1
miR-155-5p (miRNAs w/seed UAAUGCU)		mature microRNA		-1.241	0.0309	ANKFY1,ATP6V1C1,DPP7,INPP5D,MATR3,MSH2,MSH6,NARS1,PICALM,RAB6A,RCOR1,TWF1
Collagen(s)		complex			0.0322	ITGAM,LAMP1,LAMP2,NCOA5,PXN
SP1	-0.24	transcription regulator		0.87	0.0327	Akr1b7,ALDH3A2,ATP5F1B,CAD,CAT,CIRBP,CRYBB1,CTSD,CYC1,GJA1,HADHA,HADHB,HDAC2,HK2,ITGAM,MSH6,Mt1,NCF2,PARP1,PDK1,PKM,PRKCB,PSIP1,SERPINE2,SLC25A4,SLC25A5,SMAD3,SMARCC1,SMPD1,SNAP25,YY1,ZEB2
FMR1	0.194	translation regulator		-1.105	0.0329	ALDOA,Ap2b1,ATP6V1E1,EEF2,FXR1,MTOR,NAAA,RPSA,SNAP25,ST3GAL6,TAGLN2
ICMT		enzyme			0.0368	ATP5F1B,GJA1,LMNA,LMNB2
Gm15807/Hmgn5	-0.235	other			0.0368	DHX15,HNRNPA2B1,HNRNPK,SUMO1
PPP3CA	0.243	phosphatase			0.0374	CTSV,DECR1,GRN,GSTP1,LAMP2,PPP3R1,PSAP
PTP4A3		phosphatase			0.0377	HDAC2,PXN,STMN1
MED30		transcription regulator			0.0377	CS,NDUFV1,SDHB
RASSF10		other			0.0377	CASP8,PCNA
TERF2	-0.324	transcription regulator			0.0377	GLB1,TOP1
ADRA1D		G-protein coupled receptor			0.038	CTSV,PCNA,PPP3CA,TMPO,UBTF
TP63		transcription regulator		0.539	0.0396	ACTL6A,AKT1S1,CAD,CTSD,DNM2,DNMT1,FLOT2,FUBP1,G6PD,HK2,KHSRP,MDC1,MFGE8,P4HB,PCNA,POLD2,PRPF4,PRPF8,RBBP6,RCC1,REXO4,RPA1,RUNX1,SMAD3,STMN1,TPP1,ZEB2
ERMN		other			0.0397	CNP
Rap		group			0.0397	MVP
RCC1	-0.383	other			0.0397	RAN
THAP1		transcription regulator			0.0397	CCAR1
ABCA12		transporter			0.0397	GBA
CDC42BPB		kinase			0.0397	CTSB
PRDM4		transcription regulator			0.0397	ITGB2
REEP5	0.213	transporter			0.0397	TOP2B
TTL		enzyme			0.0397	CLIP1
DNAJC24	1.246	other			0.0397	EEF2
AFG3L2	0.092	peptidase			0.0397	OPA1
STOML2	0.265	other			0.0397	OPA1
Lamin b		group			0.0397	LMNA
CTU1		other			0.0397	DEK
MIGA2		other			0.0397	MACROH2A1
LRRC4		other			0.0397	STMN1
DPH2		enzyme			0.0397	EEF2
DRAM1		other			0.0397	VRK1
DGKD		kinase			0.0397	USP8
UPF3B		transporter			0.0397	UPF1
LSM10		other			0.0397	H1-2
NOL3		other			0.0397	CAD
SYP		transporter			0.0397	VAMP2
VTI1B	1.256	transporter			0.0397	STX8
PLOD1	0.292	enzyme			0.0397	GJA1
ADARB1		enzyme			0.0397	PRPS1
miR-450a-5p (and other miRNAs w/seed UUUGCGA)		mature microRNA			0.0397	HNRNPK
miR-659-3p (miRNAs w/seed UUGGUUC)		mature microRNA			0.0397	GRN
AMPH		other			0.0397	BIN1
REXO4	-0.493	transcription regulator			0.0397	CRYZ
PSMA1	-0.162	peptidase			0.0397	GSTP1
ACOT8		enzyme			0.0397	CAT
ATP5F1A	0.236	transporter			0.0397	MACROH2A1
PDE1A		enzyme			0.0397	DNMT1
DNAJC5		other			0.0397	SNAP25
ORC4		other			0.0397	LMNB2
PHF5A	-0.217	transcription regulator			0.0397	GJA1
RPN2	0.292	enzyme			0.0397	GSTP1
ORC3		other			0.0397	LMNB2
M6PR	0.4	transporter			0.0397	NPC1
ATP6V1B1		transporter			0.0397	ATP6V1B2
KAT6B		enzyme			0.0397	SMARCA2
VCX/VCX3A		other			0.0397	CAMK1
H2BC21		other			0.0397	RAN
OPRL1		G-protein coupled receptor			0.0397	PPP3CA
EBF1		transcription regulator	Activated	2	0.0413	FLOT2,HK2,INPP5D,MTOR,PCK2,PDE3B,PRKAR2A,PYGB,RPTOR,TLR3
GAST		other		1.134	0.042	ARCN1,HCFC1,HMGB2,MDH2,NARS1,PHB,PRDX3
Immunoglobulin		complex		-1.51	0.0424	ACO2,ATP5F1A,ATP5F1B,COX6B1,CTSZ,DLST,DPYSL2,EIF2A,G6PD,HK2,IDH2,KCTD12,MDH2,MTOR,NCF2,NDUFA7,NDUFS1,NDUFS8,NDUFV3,OGDH,OGT,PCK2,PDE3B,PDK1,PFKL,PRPS1,PRPS2,RAB31,SCP2,SUCLG2
CYB5R4		enzyme			0.0431	EIF2S1,GCLC,Mt1
mir-101		microRNA			0.0431	MTOR,RUNX1,STMN1
Klra7 (includes others)		transmembrane receptor			0.0431	ABCD3,Mt1,SERPINE2
LMNA	-0.459	other		1.91	0.0435	CBX5,EDC4,GCLC,GJA1,HNRNPUL1,LMNA,LMNB1,NPC1,PDCD6IP,PPM1H,RPS21,SMARCA2,SMARCC2,TMPO,TOP1,WDR33
NRG2		growth factor			0.044	BIN1,EEF1A1,ELOA,HK2,NUP214,SART3
FHIT	0.095	enzyme		-0.908	0.0447	RAB1A,RAB31,RAB7A,RAN
CHUK		kinase	Activated	2.639	0.0457	CTSB,CTSF,CTSZ,DNMT1,GM2A,GRN,HK2,IFI35,Mt1,PCNA,PLD3,RABEP2,SERPINE2,TLR3
HRAS	0.062	enzyme		-0.111	0.0465	ANXA6,ATP5F1B,COPB2,CTSB,CTSC,CTSS,CTSV,CTSZ,DNMT1,EIF3C,GJA1,GRN,GUSB,HNRNPA2B1,HNRNPUL1,ITGAM,KHDRBS1,LMNB1,MFGE8,NPM1,OXCT1,P4HB,PAFAH1B3,PCNA,PRKCB,PXN,RPS10,RTN4,SERPINE2,SMAD3,SMARCA2,SMC3,STAU1,TGM2,TOM1
MBD2	-0.381	transcription regulator			0.0469	BCAT2,G6PD,GSTP1,HK2,MEF2A,PAK2
TIP60		complex			0.0472	MCM4,PCNA
PDGF (family)		group			0.0472	HSPD1,P4HB
Ccl6		cytokine			0.0472	CTSS,CTSV
KCNJ11		ion channel			0.0472	ACADM,ACADVL
HSPA5	0.115	enzyme		0.512	0.0477	ACADM,ACADVL,EIF2A,HADHA,P4HB
Aldose Reductase		group			0.0488	G6PD,ITGAM,PCNA
CYP2E1		enzyme			0.0488	CAT,GCLC,NCF2
MAT1A		enzyme			0.0488	Mt1,PCNA,PHB
SMARCE1	-0.258	transcription regulator			0.0488	CTSD,NPC2,SMARCE1
SIN3B	-0.049	transcription regulator			0.0488	CAD,NCL,SIN3A
Mir200		group			0.0488	LRP1,SEC23A,ZEB2
IKBKG	0.32	kinase	Activated	3.138	0.0488	CTSB,CTSF,CTSZ,GM2A,GRN,HK2,Mt1,PLD3,RABEP2,SERPINE2
USP22		peptidase			0.0489	ITGAM,ITGB2,MVP,NCF2
ERN1		kinase	Activated	2.828	0.0528	CAD,GOLGA3,HDLBP,LPCAT2,NARS1,P4HB,SRP68,USO1,WARS1,XRCC1
PPARG		ligand-dependent nuclear receptor	Activated	2.773	0.0553	ACAA2,ACADM,ACADS,ALDH9A1,BIN1,CAT,CS,HADHA,HADHB,HK2,HYOU1,MTOR,NPEPPS,NSF,PCK2,PCNA,PDE3B,RPSA,SAP18,SCP2,SNX1,TKT,TUBB,VAMP2,WIPF1,YWHAE,YWHAG
BAX	0.282	transporter	Activated	2	0.0587	CTSB,CTSD,CTSH,CTSS,TGM2
ACOX1		enzyme		-1.897	0.0639	ABCD3,ACADM,ACADVL,CAT,CTSV,GSTP1,LONP1,MFGE8,RPL12,TAGLN2
ATG7	0.433	enzyme	Activated	2.433	0.0699	ACAT1,CTSB,HK1,HK2,LAMP1,PFKL
Ins1		other	Activated	2.387	0.0757	ACADM,G6PD,GDI2,GPLD1,GSTP1,HK2,HNRNPK,HSD17B4,LRP1,Mt1,PCNA,PRKCB,RPS14,SDHB,SNAP25,UQCRC1,UQCRC2,VAMP2
PTTG1		transcription regulator	Activated	2.433	0.0775	APEX1,ATRX,FEN1,SMC1A,SUMO1,XRN2
ERG		transcription regulator	Activated	2.53	0.123	ARHGAP17,ARHGEF6,CLIP1,CYFIP1,DOCK2,ELMO1,GMFB,PCNP,PXN,RAB7A,RPA1,WIPF1
NRF1	-0.139	transcription regulator	Activated	2.236	0.139	COX5A,COX6B1,GCLC,MOGS,Mt1
PI3K (family)		group		1.97	0.158	CAT,CTSD,GCLC,HK1,PKM,PXN,TGM2
TCF7L2		transcription regulator	Activated	2.36	0.167	ALDH3A2,ATP6V1G1,BIN1,CDK19,CNP,FAM91A1,KIF5B,LAMP1,MOBP,NPC1,NPC2,PICALM,RAB31,SNX18,SRSF1,TBC1D5,TWF1
IKBKB		kinase	Activated	3.579	0.168	CASP8,CTSB,CTSF,CTSZ,FSCN1,GM2A,GRN,HK2,LMNB1,Mt1,PLD3,RABEP2,SERPINE2,TLN1,TLR3
PPARD		ligand-dependent nuclear receptor	Activated	2.612	0.171	ACAA2,ACADVL,ACY1,ALDH2,ALDH3A2,ALDH9A1,CSAD,ECH1,MFGE8,PCNA,SCARB2,YWHAE
KDM1A	-0.284	enzyme	Inhibited	-2.629	0.186	CAD,CHD4,DNMT1,KHDRBS3,LCP1,MCM2,MCM4,NCL,PPP1R12A,RUVBL1,SNAP25
PAX5		transcription regulator	Inhibited	-2	0.19	G6PD,HK2,PFKL,PGAM1
EFNA2		kinase	Inhibited	-2	0.19	CDC5L,PXN,RUNX1,SUMO1
SREBF1		transcription regulator	Activated	2.611	0.209	AARS1,ACADS,ALDOA,CSAD,ETHE1,G6PD,GLB1,HK2,NCF2,NPC1,PCK2,PDK1,SMPD1
BNIP3L		other		1.98	0.215	CST3,HK2,IL16,PKM
NRIP1		transcription regulator	Inhibited	-2	0.224	ACAA2,ACO2,HADHB,SDHB
STUB1		enzyme	Activated	2	0.224	CTSS,FBL,PCNA,RUNX1
OGA		enzyme		-1.789	0.237	ACADM,ACO2,AIFM1,AKT1S1,DLST,EIF2A,FSCN1,G6PD,GAA,GTF2F2,HPGDS,LPXN,NDUFS1,OGDH,PDCD6IP,PDK1,PLD4,SERPINE2,SUCLG2,TP53BP1
NR4A3		ligand-dependent nuclear receptor		1.987	0.25	ATP5F1A,SDHB,SMAD3,UQCRC2
STAT4		transcription regulator	Activated	2.751	0.284	COPG1,FSCN1,GJA1,GLG1,HEXB,LAMTOR3,LRP1,Mt1,PDK1,SF3B1,SH3GLB1
FOXM1		transcription regulator	Inhibited	-2.012	0.303	CAT,GLB1,NBN,PCNA,STMN1,XRCC1,ZEB2
CBFB	-0.405	transcription regulator	Inhibited	-2	0.385	GPLD1,LGMN,PDE3B,RUNX1
HMOX1		enzyme	Activated	2.236	0.392	CS,G6PD,GCLC,ITGAM,PCNA,SLC25A5
SPIB		transcription regulator	Inhibited	-2	0.43	DDX46,MBD2,RNF20,ZC3H13
NR1I3		ligand-dependent nuclear receptor	Activated	2.2	0.437	GSTP1,HK1,HSD17B4,Mt1,PDE3B
CD38		enzyme	Activated	2.621	0.459	ALDOA,ANXA6,NDUFV3,PDK1,PFKL,PKM,PPP3CA
EGLN		group	Inhibited	-2.63	0.465	GREM2,HK2,HMGCL,MPI,PDK1,PFKL,PGAM1
AREG		growth factor		-1.982	0.465	RUNX1,SAE1,SSRP1,STX12
FOXO1		transcription regulator	Activated	2.358	0.48	ATP5F1B,CASP8,CAT,CS,CTSV,HSPD1,HYOU1,IKZF1,ITGAM,ITGB2,LAMP2,LEMD3,MAVS,NDUFA7,NPC1,PCK2,RAB7A,TKT
NOS2		enzyme	Activated	2.804	0.485	API5,CTSC,G6PD,GJA1,HMGB2,PCNA,TERF2,TKT
PITX2		transcription regulator	Activated	2.236	0.551	IDH2,NDUFS3,NDUFS8,RDH14,ZEB2
NRAS		enzyme	Inhibited	-2.236	1	ACADM,BUB3,GJA1,IFI35,KCTD12,NCF2,SERPINE2
HMGA1	-0.558	transcription regulator	Inhibited	-2	1	CTSC,CTSH,RAN,TRIM28
ERK1/2		group		1.915	1	ASAH1,CAT,CTSB,CTSV,GJA1,HK2,PCNA,PKM
mir-223		microRNA		1.934	1	CD180,HPGDS,PARP1,STMN1
HNF1A		transcription regulator		1.982	1	CTSZ,GARS1,GDI2,HPGDS,MSH6,NAPA,NOP16,OGDH,PCNP,PDK1,PFKL,UQCRC2,WDR46
NR1H3		ligand-dependent nuclear receptor	Activated	2	1	CAT,CTSC,FAM3C,GSTP1,HK1,MFGE8,Mt1,RPS14
FOXP3		transcription regulator	Activated	2	1	FEN1,PDE3B,RBM14,RUNX1
CSF2		cytokine	Activated	2.006	1	CD180,CTSC,GABPA,HK2,HSPD1,IK,IL16,ILF3,INPP5D,ITGAM,LAMP2,LCP1,PHGDH,PLA2G15,STMN1,TGM2,TPT1
Ige		complex	Activated	2.164	1	CDK19,ELMO1,HSPA9,HSPD1,KLC1,MTOR,NAPA,RAB7A,RUNX1,SNRPD3,SNX1,TPM3
NGF		growth factor	Activated	2.201	1	AKT1S1,DHX9,EEF1A1,LRP1,SNAP25
NFkB (complex)		complex	Activated	2.214	1	ABCD3,ALDH7A1,CASP8,CTCF,DBT,GCLC,HSPA9,ITGAM,LAMP2,MSH2,NCF2,NOP14,NUP62,PXN,RBPJ,RUNX1,SCFD1,SMAD3,TGM2,TOLLIP
IL13		cytokine	Activated	2.413	1	ACADVL,CASP8,CTSB,CTSC,CTSH,CTSS,CTSV,DNASE2,G6PD,HK1,ST3GAL6,TGM2
SMARCB1	-0.32	transcription regulator	Activated	2.449	1	ACAT1,ACTR2,GJA1,MCM2,MCM4,RAB14
